# Supplementary material
Source: Research Square preprint supplement (doi:10.21203/rs.3.rs-9846230/v1)
Supplement: Supplementary file 1 [file 93f4765f6575dc32221b9382.pdf]

**Supplementary Table 1. Differentially expressed genes in Riccia fluitans thallus after high-dose micro-/nanoplastic treatment indicated homology to at least one of two reference organisms**

| Gene.ID     | Marchantia Gene.ID | Percentage identity | Percentage coverage | INSDC_ID | Arabidopsis transID | Arabidopsis geneID | Arabidopsis Identity | Arabidopsis description                                                                                         | Arabidopsis geneName | Arabidopsis coverage | Ricciocarpos Identity | ID         | Ricciocarpos Perc | log2FoldChange | padj        |
|-------------|--------------------|---------------------|---------------------|----------|---------------------|--------------------|----------------------|-----------------------------------------------------------------------------------------------------------------|----------------------|----------------------|-----------------------|------------|-------------------|----------------|-------------|
| MSTRG.8920  | Mp3g15460          | 80,23               | 1                   | PTQ48857 |                     |                    |                      | fatty acid desaturase A [Source:NCBI gene                                                                       |                      |                      |                       |            |                   | -7,982821354   | 1,2281E-07  |
| MSTRG.15222 | Mp6g04480          | 77,459              | 0,976               | PTQ41486 | AT4G27030.          | AT4G27030          | 52,632               | (formerly Entrezgene);Acc:828811] elongation factor family protein [Source:NCBI gene (formerly                  | FADA                 | 0,7058824            |                       |            |                   | -6,368873098   | 0,000144276 |
| MSTRG.4206  | Mp2g02820          | 89,405              | 1                   | PTQ34927 | AT5G13650.          | AT5G13650          | 74,121               | Entrezgene);Acc:831209] OSBP(oxysterol binding protein)-related protein 4B [Source:NCBI gene (formerly          | SVR3                 | 0,9259259            | 92,14                 | Rn_07945.1 | 0,89336801        | -5,628455537   | 3,20837E-07 |
| MSTRG.12002 | Mp4g05320          | 69,577              | 0,8891688           | PTQ33624 | AT4G25850.          | AT4G25850          | 43,947               | Entrezgene);Acc:828691] GHMP kinase family protein [Source:NCBI                                                 | ORP4B                | 0,9921671            | 79,224                | Rn_02396.2 | 0,91624365        | -5,423625167   | 0,001363612 |
| MSTRG.20480 | Mp8g14400          | 76,023              | 0,9961014           | PTQ31721 | AT1G31910.          | AT1G31910          | 48,649               | gene (formerly Entrezgene);Acc:840081] initiation factor 4F subunit (DUF1350) [Source:NCBI gene (formerly       | AT1G31910            | 0,9940594            |                       |            |                   | -5,067081049   | 0,010002413 |
| MSTRG.17561 | Mp5g02740          | 65,823              | 0,911007            | PTQ30478 | AT3G43540.          | AT3G43540          | 50                   | Entrezgene);Acc:823446] zinc knuckle (CCHC-type) family protein [Source:NCBI gene (formerly                     | AT3G43540            | 0,8927614            | 84,759                | Rn_17392.1 | 0,82560706        | -5,009142854   | 0,010175274 |
| MSTRG.14207 | Mp5g04210          | 57,506              | 0,8639175           | PTQ29453 | AT3G42860.          | AT3G42860          | 35,277               | Entrezgene);Acc:823332] uncharacterized protein [Source:NCBI gene                                               | AT3G42860            | 0,7526882            | 61,864                | Rn_17585.1 | 0,9486653         | -4,878663858   | 0,029767573 |
| MSTRG.18536 | Mp7g09010          | 76,111              | 1                   | PTQ35839 | AT4G04190.          | AT4G04190          | 50,811               | (formerly Entrezgene);Acc:825734] MIZU-KUSSEI-like protein (Protein of unknown function, DUF617) [Source:NCBI   | AT4G04190            |                      | 1                     |            |                   | -4,750289529   | 0,020124082 |
| MSTRG.5780  | Mp2g13620          | 92,562              | 1                   | PTQ43105 | AT5G06990.          | AT5G06990          | 48,444               | gene (formerly Entrezgene);Acc:830590] GDP-L-galactose phosphorylase 1 [Source:NCBI gene (formerly              | AT5G06990            | 0,8390805            |                       |            |                   | -4,71449438    | 0,016636768 |
| MSTRG.9050  | Mp3g13840          | 63,656              | 0,9505376           | PTQ49063 |                     |                    |                      |                                                                                                                 |                      |                      |                       |            |                   | -4,652067986   | 0,010002413 |
| MSTRG.739   | Mp1g07760          | 64,031              | 0,8906606           | PTQ41014 | AT4G26850.          | AT4G26850          | 51,852               | Entrezgene);Acc:828792] YELLOW STRIPE like 6 [Source:NCBI gene                                                  | VTC2                 | 0,8823529            |                       |            |                   | -4,592418911   | 1,07453E-10 |
| MSTRG.12615 | Mp4g01710          | 63,351              | 0,994528            | PTQ32480 | AT3G27020.          | AT3G27020          | 58,915               | (formerly Entrezgene);Acc:822319] FGGY family of carbohydrate kinase [Source:NCBI gene (formerly                | YSL6                 | 0,9467456            | 70,23                 | Rn_02623.1 | 1                 | -4,552858086   | 0,047930687 |
| MSTRG.18289 | Mp7g12740          | 87,858              | 0,9816972           | PTQ49435 | AT4G30310.          | AT4G30310          | 67,863               | Entrezgene);Acc:829154] Calcium-binding endonuclease/exonuclease/phosphatase family [Source:NCBI gene (formerly | AT4G30310            | 0,9896373            | 90,806                | Rn_11799.1 | 0,99355878        | -4,550457448   | 0,035845975 |
| MSTRG.16606 | Mp6g00490          | 71,795              | 1                   | PTQ31981 | AT5G54130.          | AT5G54130          | 46,711               | Entrezgene);Acc:835500] magnesium/proton exchanger [Source:NCBI                                                 | AT5G54130            | 0,9449541            |                       |            |                   | -4,534258286   | 0,030491684 |
| MSTRG.447   | Mp5g09180          | 64,265              | 1                   | PTQ32782 |                     |                    |                      |                                                                                                                 |                      |                      |                       |            |                   | -4,508619848   | 0,025849162 |
| MSTRG.21096 | Mp5g19790          | 76,335              | 0,9123377           | PTQ29827 | AT2G47600.          | AT2G47600          | 41,569               | gene (formerly Entrezgene);Acc:819373] allantoinase [Source:NCBI gene (formerly                                 | MHX                  | 0,8701299            | 74,69                 | Rn_03380.4 | 0,92127303        | -4,459983283   | 0,035791229 |
| MSTRG.17968 | Mp7g09530          | 75,435              | 1                   | PTQ28731 | AT4G04955.          | AT4G04955          | 54,675               | Entrezgene);Acc:825836] protein [Source:NCBI gene (formerly                                                     | ALN                  | 0,9565217            |                       |            |                   | -4,426294948   | 0,00289712  |
| MSTRG.10842 | Mp4g00620          | 59,348              | 1                   | PTQ36126 |                     |                    |                      |                                                                                                                 |                      |                      |                       |            |                   | -4,394073398   | 0,017076662 |
| MSTRG.3410  | Mp1g23640          | 82,08               | 1                   | PTQ36190 | AT1G32900.          | AT1G32900          | 70,037               | hydroxycinnamoyl transferase [Source:NCBI                                                                       | GBSS1                | 0,8737705            |                       |            |                   | -4,380388556   | 6,79995E-13 |
| MSTRG.31    | Mp1g03460          | 63,927              | 0,9318182           | PTQ48644 | AT5G48930.          | AT5G48930          | 35,44                |                                                                                                                 | HCT                  | 0,9307159            |                       |            |                   | -4,347222531   | 0,037389617 |
| MSTRG.11792 | Mp4g01210          | 85,016              | 0,9586645           | PTQ36063 |                     |                    |                      |                                                                                                                 |                      |                      |                       |            |                   | -4,315958191   | 0,038742891 |









|             |           |        |           |            |                      |        |                                            |           |           |        |            |            |             |             |
|-------------|-----------|--------|-----------|------------|----------------------|--------|--------------------------------------------|-----------|-----------|--------|------------|------------|-------------|-------------|
| MSTRG.21411 | Mp8g10240 | 72,955 | 0,9647189 | PTQ47447   | AT1G68560. AT1G68560 | 48,434 | (formerly Entrezgene);Acc:843185]          | XYL1      | 0,9584699 | 76,685 | Rn_00174.1 | 0,99889381 | 1,319967996 | 0,014436718 |
| MSTRG.12086 | Mp4g23220 | 65,426 |           | 1 PTQ44429 |                      |        |                                            |           |           |        |            |            | 1,338913703 | 0,028985248 |
| MSTRG.9083  | Mp3g25090 | 58,696 | 0,9854015 | PTQ32308   |                      |        |                                            |           |           |        |            |            | 1,346799189 | 0,029611527 |
| MSTRG.16391 | Mp6g03460 | 78,041 |           | 1 PTQ41357 | AT3G01930. AT3G01930 | 49,418 | [Source:NCBI gene (formerly                | AT3G01930 | 0,9931507 |        |            |            | 1,348907098 | 0,005294964 |
| MSTRG.19917 | Mp8g00930 | 60,494 |           | 1          |                      |        |                                            |           |           |        |            |            | 1,351144648 | 0,001944792 |
| MSTRG.4329  | Mp2g20040 | 76,768 | 0,9949749 | PTQ37767   | AT4G24040. AT4G24040 | 49,818 | Entrezgene);Acc:828504]                    | TRE1      | 0,8722045 |        |            |            | 1,353084246 | 0,009084163 |
| MSTRG.18940 | Mp7g16360 | 77,687 | 0,9873418 | PTQ30526   | AT2G17700. AT2G17700 | 41,065 | protein [Source:NCBI gene (formerly        | STY8      | 0,9267399 |        |            |            | 1,353729773 | 0,031100742 |
| MSTRG.18088 | Mp7g03680 | 75,984 |           | 1 PTQ35037 | AT3G22850. AT3G22850 | 46,4   | LRDR motifs [Source:NCBI gene (formerly    | AT3G22850 | 0,9879032 |        |            |            | 1,354893003 | 0,002174363 |
| MSTRG.19226 | Mp7g17580 | 68,553 | 0,9216867 | PTQ38497   | AT5G13200. AT5G13200 | 38,832 | gene (formerly Entrezgene);Acc:831159]     | AT5G13200 | 0,9338235 | 81,57  | Rn_08584.1 | 0,88990826 | 1,358239089 | 0,001281604 |
| MSTRG.5756  | Mp2g18300 | 83,399 |           | 1 PTQ27996 | AT3G05940. AT3G05940 | 66,077 | (DUF300) [Source:NCBI gene (formerly       | AT3G05940 | 0,8033175 |        |            |            | 1,367336886 | 0,018055302 |
| MSTRG.4050  | Mp5g22830 | 69,737 | 0,9637681 | PTQ46801   | AT5G67480. AT5G67480 | 50,595 | gene (formerly Entrezgene);Acc:836884]     | BT4       | 0,8978495 |        |            |            | 1,371640942 | 0,03940059  |
| MSTRG.5019  | Mp2g08260 | 57,657 | 0,9907285 | PTQ26749   |                      |        |                                            |           |           |        |            |            | 1,380441605 | 0,010020945 |
| MSTRG.19804 | Mp4g11430 | 79,358 | 0,9746647 | PTQ46452   | AT1G17840. AT1G17840 | 53,834 | [Source:NCBI gene (formerly                | ABCG11    | 0,9004267 | 87,057 | Rn_10772.1 | 0,97447447 | 1,3822222   | 0,036674255 |
| MSTRG.12586 | Mp4g23890 | 48,876 |           | 1 PTQ44515 |                      |        |                                            |           |           |        |            |            | 1,386186639 | 0,011611927 |
| MSTRG.18718 | Mp7g13980 | 67,56  |           | 1 PTQ46971 | AT2G41480. AT2G41480 | 42,208 | [Source:NCBI gene (formerly                | AT2G41480 | 0,929878  |        |            |            | 1,386851547 | 0,00111615  |
| MSTRG.2828  | Mp1g05055 | 46,014 | 0,895189  |            |                      |        |                                            |           |           |        |            |            | 1,387059978 | 0,023751164 |
| MSTRG.10997 | Mp4g05400 | 76,608 | 0,8715596 | PTQ33613   |                      |        |                                            |           |           | 79,79  | Rn_01433.1 | 0,80511571 | 1,414353905 | 0,022387402 |
| MSTRG.21657 | Mp8g17810 | 60,284 | 0,9929577 | PTQ42390   | AT4G00680. AT4G00680 | 46,565 | gene (formerly Entrezgene);Acc:828037]     | ADF8      | 0,9357143 |        |            |            | 1,415979594 | 0,002889016 |
| MSTRG.12614 | Mp4g01710 | 72,727 | 0,994528  | PTQ32480   | AT3G27020. AT3G27020 | 59,701 | (formerly Entrezgene);Acc:822319]          | YSL6      | 0,9822485 | 81,055 | Rn_02623.1 | 1          | 1,442619433 | 0,019591725 |
| MSTRG.6843  | Mp2g20610 | 79,71  | 0,9857143 |            | AT5G43350. AT5G43350 | 67,495 | gene (formerly Entrezgene);Acc:834353]     | PHT1;1    | 0,9770992 |        |            |            | 1,457474331 | 6,78943E-05 |
| MSTRG.9331  | Mp3g09460 | 79,11  |           | 1 PTQ33871 | AT5G61380. AT5G61380 | 36,027 | protein [Source:NCBI gene (formerly        | TOC1      | 0,9174757 | 87,65  | Rn_05309.2 | 1          | 1,457551601 | 0,00485673  |
| MSTRG.981   | Mp1g05930 | 53,247 | 0,8850575 |            |                      |        |                                            |           |           |        |            |            | 1,462960343 | 0,025849162 |
| MSTRG.10759 | Mp4g06100 | 77,143 | 0,994832  | PTQ31232   |                      |        |                                            |           |           |        |            |            | 1,481330959 | 0,00954789  |
| MSTRG.7492  | Mp3g17370 | 88,571 |           | 1 PTQ40552 | AT5G63500. AT5G63500 | 55,385 | 3339] [Source:NCBI gene (formerly          | AT5G63500 | 0,942029  |        |            |            | 1,483714605 | 0,002002688 |
| MSTRG.6851  | Mp7g13050 | 84,049 | 0,8956044 | PTQ49484   | AT1G10630. AT1G10630 | 84,049 | gene (formerly Entrezgene);Acc:837606]     | ARFA1F    | 0,9005525 |        |            |            | 1,493748441 | 0,032966188 |
| MSTRG.18659 | Mp7g15460 | 81,235 | 0,8960177 | PTQ47178   | AT1G69800. AT1G69800 | 54,613 | [Source:NCBI gene (formerly                | AT1G69800 | 0,8903803 | 84,887 | Rn_12834.1 | 0,87831858 | 1,497141659 | 0,004352813 |
| MSTRG.5115  | Mp2g08950 | 77,81  | 0,9204244 | PTQ45397   | AT4G01370. AT4G01370 | 68,786 | Entrezgene);Acc:828151]                    | MPK4      | 0,9148936 | 61,557 | Rn_08414.1 | 0,87446809 | 1,499902261 | 0,030525114 |
| MSTRG.1390  | Mp1g07250 | 57,597 |           | 1 PTQ39887 | AT1G76590. AT1G76590 | 42,963 | [Source:NCBI gene (formerly                | AT1G76590 | 0,9306122 |        |            |            | 1,500733286 | 0,020731295 |
| MSTRG.9148  | Mp3g07130 | 75,646 |           | 1 PTQ48164 | AT2G23810. AT2G23810 | 53,704 | Entrezgene);Acc:816913]                    | TET8      | 0,981685  |        |            |            | 1,523965714 | 5,82727E-05 |
| MSTRG.11605 | Mp4g14430 | 85,915 | 0,8352941 | PTQ35571   | AT3G58670. AT3G58670 | 48,673 | (DUF1637) [Source:NCBI gene (formerly      | AT3G58670 | 0,892562  |        |            |            | 1,530320421 | 0,037004312 |
| MSTRG.16437 | Mp6g01640 | 94,326 |           | 1 PTQ38240 | AT2G47900. AT2G47900 | 61,321 | (formerly Entrezgene);Acc:819402]          | TLP3      | 1         |        |            |            | 1,537142367 | 2,52342E-06 |
| MSTRG.1224  | Mp5g16610 | 47,799 |           | 1 PTQ30991 |                      |        |                                            |           |           |        |            |            | 1,562545293 | 0,042397392 |
| MSTRG.14547 | Mp6g19440 | 55,056 |           | 1 PTQ39468 |                      |        |                                            |           |           |        |            |            | 1,579198734 | 0,023072672 |
| MSTRG.5586  | Mp2g17450 | 71,557 | 0,990991  | PTQ32833   | AT5G22340. AT5G22340 | 41,697 | [Source:NCBI gene (formerly                | AT5G22340 | 0,8328173 |        |            |            | 1,588283296 | 0,037706154 |
| MSTRG.13651 | Mp4g23410 | 88,916 | 0,9805195 | PTQ44449   | AT1G17500. AT1G17500 | 62,138 | dehalogenase-like hydrolase family protein | AT1G17500 | 0,9819079 |        |            |            | 1,598253691 | 0,006512701 |
| MSTRG.16777 | Mp6g05730 | 76,972 |           | 1 PTQ32595 |                      |        |                                            |           |           |        |            |            | 1,60214779  | 0,035845975 |
| MSTRG.13017 | Mp3g17090 | 40,764 | 0,9978448 | PTQ40596   |                      |        |                                            |           |           |        |            |            | 1,608727026 | 0,030941049 |
| MSTRG.13400 | Mp4g18210 | 70,225 | 0,8592233 | PTQ40238   | AT4G35770. AT4G35770 | 47,712 | superfamily protein [Source:NCBI gene      | SEN1      | 0,8351648 |        |            |            | 1,621915878 | 2,56219E-06 |
| MSTRG.4624  | Mp2g14680 | 88,288 |           | 1 PTQ40055 | AT1G48130. AT1G48130 | 51,852 | gene (formerly Entrezgene);Acc:841231]     | PER1      | 0,9722222 |        |            |            | 1,625905961 | 0,031100742 |
| MSTRG.4581  | Mp2g06720 | 41,333 | 0,9375    | PTQ44271   |                      |        |                                            |           |           |        |            |            | 1,63628224  | 0,03948977  |
| MSTRG.10539 | Mp3g07520 | 81,471 | 0,991573  | PTQ48223   | AT5G63190. AT5G63190 | 57,528 | [Source:NCBI gene (formerly                | AT5G63190 | 1         |        |            |            | 1,653263401 | 0,000116347 |
| MSTRG.17485 | Mp7g10100 | 88,452 |           | 1 PTQ49124 | AT3G51370. AT3G51370 | 60,59  | [Source:NCBI gene (formerly                | AT3G51370 | 0,9788918 |        |            |            | 1,653537899 | 0,002613385 |
| MSTRG.12220 | Mp5g14810 | 85,489 | 0,994077  | PTQ27062   | AT5G51070. AT5G51070 | 61,839 | Entrezgene);Acc:835180]                    | ERD1      | 0,9068783 | 87,879 | Rn_03624.2 | 1          | 1,66058004  | 5,98466E-05 |
| MSTRG.3147  | Mp1g23820 | 90,837 |           | 1 PTQ36898 | AT5G43430. AT5G43430 | 74,502 | [Source:NCBI gene (formerly                | ETF BETA  | 1         |        |            |            | 1,665527228 | 0,003235397 |



|             |           |        |           |            |                      |        |                                            |           |            |            |             |             |
|-------------|-----------|--------|-----------|------------|----------------------|--------|--------------------------------------------|-----------|------------|------------|-------------|-------------|
| MSTRG.887   | Mp1g00810 | 60,697 | 0,9850746 | PTQ32032   |                      |        |                                            | 62,069    | Rn_14485.1 | 0,98507463 | 2,165674582 | 0,001379602 |
| MSTRG.900   | Mp1g08920 | 76,749 |           | 1 PTQ41160 |                      |        |                                            |           |            |            | 2,165796896 | 0,003860965 |
| MSTRG.14181 | Mp6g17980 | 87,5   |           | 1 PTQ40647 |                      |        |                                            |           |            |            | 2,172399046 | 0,017479407 |
| MSTRG.6775  | Mp2g08820 | 66,856 | 0,9616438 |            |                      |        |                                            | 69,318    | Rn_08427.1 | 0,81400966 | 2,176678091 | 0,000494042 |
| MSTRG.7255  | Mp3g10710 | 71,255 |           | 1 PTQ40957 | AT3G15730. AT3G15730 | 56,227 | (formerly Entrezgene);Acc:820816]          |           |            |            | 2,18789849  | 0,013613991 |
| MSTRG.11249 | Mp4g09200 | 57,822 | 0,9938462 | PTQ31364   |                      |        |                                            | 65,278    | Rn_02436.5 | 0,98305085 | 2,19726298  | 0,000459737 |
| MSTRG.12135 | Mp4g13880 | 67,13  | 0,9448124 | PTQ35633   |                      |        |                                            |           |            |            | 2,206735315 | 0,026977592 |
| MSTRG.6414  | Mp2g19600 | 65,109 |           | 1 PTQ37834 | AT3G03800. AT3G03800 | 53,618 | (formerly Entrezgene);Acc:821141]          |           |            |            | 2,223453502 | 3,091E-07   |
| MSTRG.14918 | Mp6g10340 | 58,904 | 0,844358  | PTQ45016   |                      |        |                                            |           |            |            | 2,263946615 | 0,007865991 |
| MSTRG.9249  | Mp3g16350 | 84,375 |           | 1 PTQ48738 |                      |        |                                            |           |            |            | 2,271876092 | 0,032620476 |
| MSTRG.11525 | Mp5g19880 | 87,966 |           | 1 PTQ27328 | AT1G13440. AT1G13440 | 77,381 | C2 [Source:NCBI gene (formerly             | GAPC2     | 0,9940828  |            | 2,272022405 | 0,00040001  |
| MSTRG.11250 | Mp4g09210 | 84,774 | 0,9346154 | PTQ31365   | AT1G65930. AT1G65930 | 79,854 | dehydrogenase [Source:NCBI gene (formerly  | cICDH     | 1          |            | 2,284545097 | 6,1211E-13  |
| MSTRG.11121 | Mp4g05450 | 59,763 |           | 1 PTQ33607 |                      |        |                                            |           |            |            | 2,29458414  | 5,14613E-10 |
| MSTRG.12242 | Mp4g22130 | 47,148 | 0,9003436 | PTQ33271   |                      |        |                                            | 63,177    | Rn_02103.1 | 0,99638989 | 2,336773429 | 0,010902461 |
| MSTRG.5243  | Mp5g17000 | 82,456 | 0,9047619 | PTQ30924   |                      |        |                                            |           |            |            | 2,342363512 | 0,000941223 |
| MSTRG.10660 | Mp4g00100 | 50,435 | 0,9495798 | PTQ28481   |                      |        |                                            |           |            |            | 2,359885413 | 0,001484767 |
| MSTRG.19400 | Mp7g15000 | 61,168 | 0,8834356 | PTQ47100   | AT5G64120. AT5G64120 | 45,205 | gene (formerly Entrezgene);Acc:836533]     | AT5G64120 | 0,8871951  |            | 2,361398842 | 0,005176719 |
| MSTRG.3225  | Mp1g02840 | 64,948 | 0,9874214 | PTQ31297   | AT1G01040. AT1G01040 | 36,005 | Entrezgene);Acc:839574]                    | DCL1      | 0,8035621  |            | 2,365029443 | 1,36243E-05 |
| MSTRG.741   | Mp1g10870 | 57,741 | 0,974026  | PTQ45620   |                      |        |                                            |           |            |            | 2,376288998 | 5,14486E-05 |
| MSTRG.17053 | Mp7g01400 | 77,489 |           | 1 PTQ32376 |                      |        |                                            |           |            |            | 2,377643425 | 0,012902703 |
| MSTRG.21238 | Mp8g15410 | 67,812 |           | 1 PTQ34572 | AT3G47550. AT3G47550 | 47,231 | protein [Source:NCBI gene (formerly        | AT3G47550 | 0,9618056  |            | 2,379198593 | 5,17337E-10 |
| MSTRG.1661  | Mp1g02750 | 81,685 | 0,9349315 | PTQ31285   | AT5G44730. AT5G44730 | 65,041 | superfamily protein [Source:NCBI gene      | AT5G44730 | 0,9607843  |            | 2,400219032 | 0,000460804 |
| MSTRG.162   | Mp5g21020 | 68,635 | 0,9678571 | PTQ37307   |                      |        |                                            |           |            |            | 2,40121023  | 0,008967549 |
| MSTRG.15608 | Mp6g18140 | 90,625 | 0,9955357 | PTQ40664   | AT1G07920. AT1G07920 | 89,509 | protein [Source:NCBI gene (formerly        | AT1G07920 | 0,9933185  |            | 2,410767363 | 0,000266745 |
| MSTRG.19073 | Mp7g10040 | 54,194 | 0,9625    | PTQ49115   |                      |        |                                            |           |            |            | 2,426857103 | 6,12521E-06 |
| MSTRG.7815  | Mp3g07750 | 68,79  | 0,98125   | PTQ48253   | AT3G11470. AT3G11470 | 43,706 | superfamily [Source:NCBI gene (formerly    | AT3G11470 | 0,89       |            | 2,433625559 | 0,001280281 |
| MSTRG.5095  | Mp2g11890 | 84,914 | 0,8754864 |            |                      |        |                                            |           |            |            | 2,458916619 | 0,000265564 |
| MSTRG.12598 | Mp4g16470 | 65,314 | 0,9550781 |            | AT1G56310. AT1G56310 | 36,106 | like superfamily protein [Source:NCBI gene | AT1G56310 | 0,8862479  |            | 2,477215748 | 0,023907884 |
| MSTRG.10107 | Mp6g07600 | 46,912 | 0,8233618 | PTQ38139   | AT5G54510. AT5G54510 | 39,701 | [Source:NCBI gene (formerly                | DFL1      | 0,9591503  |            | 2,478673094 | 0,0044739   |
| MSTRG.14329 | Mp1g21400 | 70,526 | 0,9313725 | PTQ50537   |                      |        |                                            |           |            |            | 2,497263278 | 0,00289712  |
| MSTRG.12487 | Mp4g03900 | 87,562 |           | 1 PTQ39644 | AT2G06990. AT2G06990 | 68,528 | protein [Source:NCBI gene (formerly        | HEN2      | 0,9668342  |            | 2,506746249 | 0,009813842 |
| MSTRG.17661 | Mp5g15630 | 70,539 |           | 1 PTQ35431 | AT1G24620. AT1G24620 | 52,482 | [Source:NCBI gene (formerly                | AT1G24620 | 0,7365591  |            | 2,508411867 | 8,75655E-08 |
| MSTRG.9581  | Mp5g04040 | 59,14  | 0,8181818 |            |                      |        |                                            |           |            |            | 2,512531733 | 6,7525E-06  |
| MSTRG.455   | Mp1g14390 | 82,774 |           | 1 PTQ27935 | AT1G51350. AT1G51350 | 43,012 | [Source:NCBI gene (formerly                | AT1G51350 | 0,9594595  |            | 2,520063113 | 1,31249E-05 |
| MSTRG.4729  | Mp2g07920 | 84,483 | 0,95625   | PTQ45271   | AT1G74380. AT1G74380 | 65,271 | gene (formerly Entrezgene);Acc:843779]     | XXT5      | 0,8796499  |            | 2,523978803 | 0,020163869 |
| MSTRG.10537 | Mp4g16650 | 100    |           | 1 PTQ38031 | AT1G61700. AT1G61700 | 88,732 | [Source:NCBI gene (formerly                | AT1G61700 | 1          |            | 2,526839804 | 0,035791229 |
| MSTRG.18118 | Mp4g16550 | 46,104 | 0,9363057 | PTQ26280   | AT1G60950. AT1G60950 | 41,176 | [Source:NCBI gene (formerly                | FED A     | 0,9932432  |            | 2,530243299 | 0,012192247 |
| MSTRG.1696  | Mp1g02040 | 64,378 | 0,9935135 | PTQ42500   |                      |        |                                            |           |            |            | 2,545433434 | 1,11565E-05 |
| MSTRG.20728 | Mp8g14810 | 43,056 | 0,9918699 | PTQ28952   |                      |        |                                            | 64,87     | Rn_09116.1 | 0,99201597 | 2,555733696 | 0,02073362  |
| MSTRG.19881 | Mp8g00660 | 64,062 |           | 1 PTQ34676 |                      |        |                                            |           |            |            | 2,561181868 | 0,023236019 |
| MSTRG.10862 | Mp4g04090 | 67,982 | 0,9432203 | PTQ39606   |                      |        |                                            |           |            |            | 2,585495957 | 0,009928126 |
| MSTRG.3803  | Mp1g14820 | 69,373 | 0,8996656 | PTQ28837   | AT1G28100. AT1G28100 | 45,423 | (formerly Entrezgene);Acc:839703]          | AT1G28100 | 0,9751773  |            | 2,589201715 | 0,003860965 |
| MSTRG.15717 | Mp6g08350 | 68,986 | 0,9991259 | PTQ37010   |                      |        |                                            |           |            |            | 2,628115287 | 0,017191916 |
| MSTRG.4849  | Mp2g05610 | 63,672 | 0,9918699 | PTQ44135   |                      |        |                                            | 70,8      | Rn_06728.2 | 1          | 2,633120255 | 6,78943E-05 |

|             |           |        |           |            |                      |        |                                               |           |           |        |            |            |             |             |
|-------------|-----------|--------|-----------|------------|----------------------|--------|-----------------------------------------------|-----------|-----------|--------|------------|------------|-------------|-------------|
| MSTRG.19134 | Mp5g20940 | 64,94  | 0,9768089 | PTQ37292   | AT4G01210. AT4G01210 | 39,125 | [Source:NCBI gene (formerly                   | AT4G01210 | 0,8098933 |        |            |            | 2,651726945 | 0,006806328 |
| MSTRG.3205  | Mp1g04220 | 71,319 | 0,996139  | PTQ48553   | AT4G11350. AT4G11350 | 44,639 | (DUF604) [Source:NCBI gene (formerly          | AT4G11350 | 0,8934911 | 76,864 | Rn_15294.3 | 0,9980198  | 2,685909951 | 0,00014988  |
| MSTRG.6007  | Mp7g00660 | 68,493 | 0,9733333 | PTQ39237   | AT3G03341. AT3G03341 | 61,111 | (formerly Entrezgene);Acc:6240770]            | AT3G03341 | 1         |        |            |            | 2,69113824  | 8,3203E-09  |
| MSTRG.8603  | Mp3g15720 | 60,9   |           | 1 PTQ48825 |                      |        |                                               |           |           | 71,295 | Rn_18588.1 | 0,99882629 | 2,704626116 | 7,57474E-05 |
| MSTRG.10777 | Mp5g15440 | 54,51  | 0,9270073 | PTQ35451   |                      |        |                                               |           |           |        |            |            | 2,745477758 | 7,15378E-09 |
| MSTRG.21243 | Mp8g15360 | 44,86  |           | 1          |                      |        |                                               |           |           |        |            |            | 2,749984152 | 0,023037705 |
| MSTRG.7101  | Mp6g19490 | 65,809 | 0,9978166 | PTQ39463   | AT5G41610. AT5G41610 | 44,51  | (formerly Entrezgene);Acc:834163]             | CHX18     | 0,808642  | 71,924 | Rn_13524.1 | 0,9957492  | 2,751417238 | 0,003421181 |
| MSTRG.13457 | Mp4g17380 | 80,122 | 0,9879276 | PTQ40118   |                      |        |                                               |           |           | 89,144 | Rn_02951.1 | 0,99790795 | 2,823808552 | 1,00204E-06 |
| MSTRG.18240 | Mp7g02370 | 51,115 |           | 1 PTQ33503 |                      |        |                                               |           |           |        |            |            | 2,857622015 | 8,5274E-06  |
| MSTRG.17890 | Mp7g08260 | 45,763 | 0,9620253 | PTQ29204   |                      |        |                                               |           |           |        |            |            | 2,880356069 | 4,68785E-05 |
| MSTRG.9413  | Mp5g22720 | 73,805 | 0,9980658 | PTQ46813   |                      |        |                                               |           |           |        |            |            | 2,908935806 | 3,15646E-07 |
| MSTRG.9851  | Mp3g06960 | 45,798 | 0,9915966 |            |                      |        |                                               |           |           |        |            |            | 2,932672743 | 0,001199199 |
| MSTRG.14187 | Mp6g18000 | 56,604 | 0,9237668 | PTQ40650   |                      |        |                                               |           |           |        |            |            | 2,933016622 | 0,012192247 |
| MSTRG.21192 | Mp8g16290 | 82,863 | 0,9034608 | PTQ28810   | AT5G03860. AT5G03860 | 70,101 | (formerly Entrezgene);Acc:831690]             | MLS       | 0,8807829 | 92,323 | Rn_09720.1 | 0,90493601 | 2,938678622 | 0,000200525 |
| MSTRG.3297  | Mp1g11710 | 78,493 | 0,9530026 | PTQ45514   |                      |        |                                               |           |           |        |            |            | 2,948389006 | 8,01968E-05 |
| MSTRG.16284 | Mp5g09910 | 57,831 | 0,9502488 | PTQ38971   |                      |        |                                               |           |           |        |            |            | 2,948419468 | 0,000317571 |
| MSTRG.7821  | Mp3g17510 | 55,694 | 0,9269231 | PTQ40536   |                      |        |                                               |           |           |        |            |            | 2,965070446 | 0,043464388 |
| MSTRG.17988 | Mp7g00270 | 68,12  | 0,9286422 | PTQ39284   | AT1G64060. AT1G64060 | 52,453 | [Source:NCBI gene (formerly                   | RBOF F    | 0,8622881 |        |            |            | 2,974349189 | 0,006446685 |
| MSTRG.16895 | Mp6g02720 | 88,546 | 0,9883041 | PTQ41267   | AT1G78570. AT1G78570 | 81,129 | (formerly Entrezgene);Acc:844193]             | RHM1      | 1         |        |            |            | 2,97869232  | 3,11456E-07 |
| MSTRG.1236  | Mp1g04490 | 80,632 |           | 1 PTQ48518 | AT5G38200. AT5G38200 | 57,623 | superfamily protein [Source:NCBI gene         | AT5G38200 | 0,9449541 |        |            |            | 2,979213146 | 0,008980833 |
| MSTRG.798   | Mp1g01520 | 73,649 | 0,9942197 | PTQ42568   |                      |        |                                               |           |           |        |            |            | 2,985156904 | 2,65584E-09 |
| MSTRG.18313 | Mp7g19240 | 75,079 | 0,9241983 |            | AT5G64260. AT5G64260 | 46,69  | (formerly Entrezgene);Acc:836547]             | EXL2      | 0,9081967 |        |            |            | 3,037317854 | 3,3346E-08  |
| MSTRG.17454 | Mp7g06380 | 90,909 |           | 1 PTQ37394 | AT5G59840. AT5G59840 | 66,99  | [Source:NCBI gene (formerly                   | AT5G59840 | 0,9490741 |        |            |            | 3,057248032 | 0,009829648 |
| MSTRG.19008 | Mp7g10800 | 68,935 | 0,9411765 | PTQ49201   |                      |        |                                               |           |           |        |            |            | 3,068455193 | 3,24335E-09 |
| MSTRG.7858  | Mp2g00230 | 68,61  | 0,9911111 | PTQ42836   |                      |        |                                               |           |           |        |            |            | 3,079178604 | 7,15378E-09 |
| MSTRG.14894 | Mp6g15340 | 86,279 | 0,9839817 | PTQ37575   | AT4G28550. AT4G28550 | 48,086 | protein [Source:NCBI gene (formerly           | AT4G28550 | 0,9646226 |        |            |            | 3,085607241 | 6,67925E-05 |
| MSTRG.3610  | Mp1g23000 | 62,525 | 0,9388323 | PTQ36277   | AT1G28440. AT1G28440 | 38,215 | Entrezgene);Acc:839742]                       | HSL1      | 0,9718876 | 76,062 | Rn_16604.1 | 0,89119171 | 3,165418595 | 0,003130516 |
| MSTRG.255   | Mp1g22210 | 73,481 |           | 1 PTQ50673 |                      |        |                                               |           |           |        |            |            | 3,172249324 | 1,40289E-06 |
| MSTRG.7160  | Mp2g24070 | 80,319 |           | 1 PTQ35717 |                      |        |                                               |           |           |        |            |            | 3,194565041 | 0,000885003 |
| MSTRG.6400  | Mp2g17330 | 79,394 |           | 1 PTQ32819 | AT3G17020. AT3G17020 | 45,806 | superfamily protein [Source:NCBI gene         | AT3G17020 | 0,9447853 | 78,528 | Rn_07371.1 | 1          | 3,21000985  | 0,00108476  |
| MSTRG.19017 | Mp5g11430 | 61,741 | 0,8688525 |            |                      |        |                                               |           |           |        |            |            | 3,236160492 | 0,014040543 |
| MSTRG.16108 | Mp6g10520 | 71,883 |           | 1 PTQ45035 |                      |        |                                               |           |           | 80,198 | Rn_00410.2 | 1          | 3,327775294 | 2,27084E-06 |
| MSTRG.7007  | Mp2g11400 | 78,901 | 0,9911032 | PTQ43801   | AT3G21720. AT3G21720 | 66,667 | Entrezgene);Acc:821726]                       | ICL       | 0,9583333 | 74,265 | Rn_01651.1 | 0,81381381 | 3,34097171  | 0,002587856 |
| MSTRG.17665 | Mp5g09910 | 51,687 | 0,9038143 | PTQ38971   |                      |        |                                               |           |           |        |            |            | 3,356753584 | 0,04605638  |
| MSTRG.6869  | Mp2g15660 | 71,044 | 0,9715847 | PTQ34224   | AT2G32810. AT2G32810 | 56,655 | (formerly Entrezgene);Acc:817842]             | BGAL9     | 0,9560316 | 76,464 | Rn_07778.2 | 0,97145993 | 3,439998828 | 7,51221E-07 |
| MSTRG.7963  | Mp3g22860 | 68,132 | 0,8380952 | PTQ43547   |                      |        |                                               |           |           | 72,857 | Rn_18453.1 | 0,99526066 | 3,444851128 | 8,75655E-08 |
| MSTRG.19935 | Mp8g07630 | 52,973 |           | 1 PTQ45782 |                      |        |                                               |           |           |        |            |            | 3,451242294 | 0,029022187 |
| MSTRG.7687  | Mp3g05550 | 80,147 | 0,9890909 | PTQ47982   | AT1G71790. AT1G71790 | 64,228 | capping protein Capz superfamily              | CPB       | 0,9570313 |        |            |            | 3,4524494   | 0,007719762 |
| MSTRG.21292 | Mp8g05490 | 89,202 | 0,9530201 | PTQ34323   | AT2G36530. AT2G36530 | 83,059 | Entrezgene);Acc:818226]                       | LOS2      | 0,954955  |        |            |            | 3,493841092 | 0,014013808 |
| MSTRG.6023  | Mp2g16060 | 86,587 | 0,9039616 | PTQ30639   | AT4G02280. AT4G02280 | 69,421 | (formerly Entrezgene);Acc:828081]             | SUS3      | 0,8974042 |        |            |            | 3,507455631 | 6,1211E-13  |
| MSTRG.11799 | Mp4g05880 | 75,897 |           | 1 PTQ33559 | AT5G13210. AT5G13210 | 46,667 | UCP015417, vWA [Source:NCBI gene              | AT5G13210 | 1         | 82,446 | Rn_01945.1 | 1          | 3,515404353 | 0,000132986 |
| MSTRG.3881  | Mp5g16770 | 52,745 | 0,8864469 | PTQ30970   |                      |        |                                               |           |           | 66,253 | Rn_17761.1 | 0,82556131 | 3,573308716 | 1,62619E-07 |
| MSTRG.16143 | Mp6g02620 | 61,622 | 0,987976  | PTQ41257   | AT4G27410. AT4G27410 | 59,009 | transcriptional regulator superfamily protein | RD26      | 0,7037037 |        |            |            | 3,583137326 | 0,002253426 |
| MSTRG.15008 | Mp6g08170 | 71,717 | 0,9314421 | PTQ37035   |                      |        |                                               |           |           | 73,98  | Rn_13961.1 | 0,975      | 3,613033498 | 0,002206449 |

|               |           |        |           |          |                      |        |                                            |              |           |        |            |            |             |             |
|---------------|-----------|--------|-----------|----------|----------------------|--------|--------------------------------------------|--------------|-----------|--------|------------|------------|-------------|-------------|
| MSTRG.4640    | Mp2g08350 | 91,231 | 1         | PTQ45322 | AT5G02500. AT5G02500 | 87,25  | [Source:NCBI gene (formerly                | HSC70-1      | 1         | 91,512 | Rn_07667.1 | 1          | 3,620599908 | 0,001699244 |
| MSTRG.1936    | Mp5g15730 | 72,603 | 0,992016  | PTQ35420 | AT3G61320. AT3G61320 | 52,137 | (formerly Entrezgene);Acc:825304]          | AT3G61320    | 0,8560976 |        |            |            | 3,668011824 | 1,11742E-06 |
| MSTRG.13066   | Mp4g20090 | 68,393 | 0,9543568 | PTQ31021 | AT2G25800. AT2G25800 | 38,95  | gene (formerly Entrezgene);Acc:817122]     | AT2G25800    | 0,9078014 |        |            |            | 3,705580821 | 0,000229499 |
| MSTRG.15740   | Mp6g06750 | 91,292 | 1         | PTQ28117 | AT5G37600. AT5G37600 | 81,586 | (formerly Entrezgene);Acc:833738]          | GSR 1        | 0,991573  |        |            |            | 3,724385861 | 0,028811751 |
| MSTRG.19333   | Mp7g16060 | 70,726 | 0,9555723 |          | AT1G02520. AT1G02520 | 54,857 | (formerly Entrezgene);Acc:839353]          | ABCB11       | 0,9671362 | 75,931 | Rn_12596.1 | 0,99850858 | 3,840821233 | 2,18332E-07 |
| MSTRG.1452    | Mp1g21170 | 81,102 | 1         | PTQ50501 | AT1G49340. AT1G49340 | 57,143 | protein [Source:NCBI gene (formerly        | ATPI4K ALPH, | 0,8648915 | 89,727 | Rn_14679.1 | 0,88222923 | 3,887368623 | 0,034192113 |
| MSTRG.11472   | Mp6g14980 | 50,418 | 0,8984674 | PTQ37528 | AT4G29130. AT4G29130 | 42,609 | Entrezgene);Acc:829034]                    | HXK1         | 0,9092742 |        |            |            | 3,941224344 | 0,001647101 |
| MSTRG.7855    | Mp3g09940 | 61,979 | 0,9876977 | PTQ33813 | AT2G21070. AT2G21070 | 39,201 | (formerly Entrezgene);Acc:816642]          | FIO1         | 0,9565217 |        |            |            | 3,94701624  | 0,000649218 |
| MSTRG.15205   | Mp6g12800 | 73,937 | 0,9653333 | PTQ37141 |                      |        |                                            |              |           | 80,581 | Rn_13226.1 | 1          | 4,000378062 | 0,00207339  |
| MSTRG.7555    | Mp3g17050 | 57,066 | 0,9333895 | PTQ40600 | AT5G63930. AT5G63930 | 39,048 | protein [Source:NCBI gene (formerly        | AT5G63930    | 0,9591652 | 64,312 | Rn_17985.1 | 0,88301282 | 4,064487059 | 5,34203E-06 |
| MSTRG.20469   | Mp8g01390 | 59,355 | 0,9810127 | PTQ36376 |                      |        |                                            |              |           | 48,387 | Rn_10167.1 | 0,81151832 | 4,101121549 | 0,044307645 |
| MSTRG.9052    | Mp3g13820 | 53,859 | 0,9882155 |          | AT1G12110. AT1G12110 | 39,123 | (formerly Entrezgene);Acc:837763]          | NRT1.1       | 0,9542373 |        |            |            | 4,107274968 | 9,12953E-10 |
| MSTRG.9652    | Mp3g05380 | 65,169 | 1         | PTQ47959 |                      |        |                                            |              |           |        |            |            | 4,111679936 | 0,047494208 |
| MSTRG.15871   | Mp6g09020 | 73,016 | 0,842246  | PTQ36922 |                      |        |                                            |              |           | 78,095 | Rn_00202.2 | 0,84366577 | 4,158661594 | 2,36118E-09 |
| MSTRG.6004    | Mp2g07170 | 80,769 | 0,9380734 | PTQ45180 |                      |        |                                            |              |           |        |            |            | 4,163780346 | 0,000181981 |
| MSTRG.19136   | Mp7g17960 | 57,326 | 0,8724374 | PTQ32179 |                      |        |                                            |              |           |        |            |            | 4,238680791 | 0,00665373  |
| MSTRG.13206   | Mp4g10060 | 80,218 | 0,9931694 | PTQ29977 | AT2G37040. AT2G37040 | 64,799 | (formerly Entrezgene);Acc:818280]          | PAL1         | 0,9586207 |        |            |            | 4,366006717 | 0,00553706  |
| evm.TU.chr8.2 | Mp3g15330 | 56,863 | 0,9161677 | PTQ48876 | AT5G05340. AT5G05340 | 48,675 | gene (formerly Entrezgene);Acc:830416]     | PRX52        | 0,9228395 |        |            |            | 4,401647342 | 0,018927759 |
| MSTRG.17090   | Mp7g02500 | 62,043 | 0,9945652 | PTQ33490 |                      |        |                                            |              |           | 71,106 | Rn_12448.1 | 0,99891304 | 4,404898515 | 6,78943E-05 |
| MSTRG.9233    | Mp3g15610 | 76,708 | 0,9757576 | PTQ48838 | AT3G07720. AT3G07720 | 53,481 | protein [Source:NCBI gene (formerly        | AT3G07720    | 0,9544073 |        |            |            | 4,439773651 | 2,24001E-15 |
| MSTRG.8359    | Mp3g03520 | 64,198 | 0,8202532 | PTQ44097 | AT4G02500. AT4G02500 | 47,246 | (formerly Entrezgene);Acc:827940]          | XT2          | 0,7440347 | 70,219 | Rn_18332.1 | 0,81585678 | 4,48314365  | 0,011375433 |
| MSTRG.17666   | Mp5g09910 | 54,651 | 0,9850746 | PTQ38971 |                      |        |                                            |              |           | 61,921 | Rn_03868.1 | 0,99173554 | 4,500537784 | 0,000116347 |
| MSTRG.20013   | Mp8g05080 | 78,736 | 0,972067  |          | AT2G30490. AT2G30490 | 64,752 | (formerly Entrezgene);Acc:817599]          | C4H          | 0,9960396 | 85,495 | Rn_09318.1 | 1          | 4,527710877 | 2,72831E-07 |
| MSTRG.1350    | Mp3g01290 | 41,667 | 0,8229885 | PTQ47717 | AT2G38240. AT2G38240 | 35,843 | oxygenase superfamily protein [Source:NCBI | AT2G38240    | 0,8951841 | 82,946 | Rn_14997.1 | 0,99220779 | 4,57564701  | 1,81674E-08 |
| MSTRG.10832   | Mp4g08700 | 58,824 | 0,9963702 | PTQ28677 |                      |        |                                            |              |           | 55,668 | Rn_02272.1 | 0,81869688 | 4,614034969 | 0,000143168 |
| MSTRG.997     | Mp5g02020 | 70,933 | 0,9543011 | PTQ28496 | AT5G25770. AT5G25770 | 46,779 | [Source:NCBI gene (formerly                | AT5G25770    | 0,9694444 | 77,322 | Rn_17785.1 | 0,99725275 | 4,691162246 | 3,84608E-05 |
| MSTRG.657     | Mp1g08490 | 57,718 | 0,9591837 | PTQ41111 |                      |        |                                            |              |           |        |            |            | 4,728309881 | 5,98463E-09 |
| MSTRG.9838    | Mp3g13290 | 71,218 | 1         | PTQ38677 |                      |        |                                            |              |           |        |            |            | 4,890875585 | 0,001045816 |
| MSTRG.7565    | Mp3g19060 | 85,34  | 0,9685157 |          | AT4G37870. AT4G37870 | 75,399 | [Source:NCBI gene (formerly                | PCK1         | 0,928465  |        |            |            | 5,027621533 | 1,06895E-10 |
| MSTRG.12889   | Mp4g14730 | 77,46  | 1         | PTQ35533 | AT2G20630. AT2G20630 | 50,37  | gene (formerly Entrezgene);Acc:816590]     | PIA1         | 0,9462366 | 85,669 | Rn_02878.1 | 0,99680511 | 5,07923818  | 1,47217E-21 |
| MSTRG.7898    | Mp4g20920 | 46,462 | 0,9147727 | PTQ32246 |                      |        |                                            |              |           |        |            |            | 5,119757063 | 2,25892E-05 |
| MSTRG.10789   | Mp4g01700 | 64,865 | 0,8354839 | PTQ32481 |                      |        |                                            |              |           |        |            |            | 5,152376725 | 0,008068788 |
| MSTRG.8990    | Mp3g15330 | 56,798 | 0,991018  | PTQ48876 | AT5G06720. AT5G06720 | 50,467 | Entrezgene);Acc:830561]                    | PA2          | 0,958209  |        |            |            | 5,196939456 | 0,000649218 |
| MSTRG.8344    | Mp3g18630 | 77,311 | 0,9978947 |          | AT2G38960. AT2G38960 | 65,479 | [Source:NCBI gene (formerly                | ERO2         | 0,7690678 |        |            |            | 5,228850311 | 4,15974E-08 |
| MSTRG.13464   | Mp4g17360 | 84,286 | 0,9882353 | PTQ40116 |                      |        |                                            |              |           | 80,58  | Rn_02217.1 | 0,83646617 | 5,45523102  | 3,96103E-08 |
| MSTRG.17979   | Mp7g02500 | 57,844 | 0,9978261 | PTQ33490 |                      |        |                                            |              |           | 65,278 | Rn_12448.1 | 0,99891304 | 5,822174182 | 0,00739868  |

**Supplementary Table 2. Differentially expressed non-homology RNAs and long noncoding RNAs in *Riccia fluitans* thallus after high-dose micro-/nanoplastic treatment**

| Row.names   | baseMean         | log2FoldChange    | pvalue    | padj      | CTR_1     | CTR_2     | CTR_3     | CTR_4     | CTR_5     | HIGH_1    | HIGH_2    | HIGH_3    | gene_id  | gene_coding |
|-------------|------------------|-------------------|-----------|-----------|-----------|-----------|-----------|-----------|-----------|-----------|-----------|-----------|----------|-------------|
| MSTRG.10024 | 7.7032559943682  | 3.09023540431398  | 0.0003742 | 0.0100344 | 2.8137248 | 2.3544829 | 3.5920397 | 0         | 0         | 7.3429088 | 28.693539 | 16.829352 | MSTRG.10 | Non-coding  |
| MSTRG.10091 | 32.2903101409044 | -1.74407123839111 | 0.0011427 | 0.0235718 | 64.403035 | 54.153107 | 34.723050 | 23.080089 | 42.917387 | 12.238181 | 7.1733847 | 19.634244 | MSTRG.10 | Coding      |
| MSTRG.10218 | 232.764011343939 | 3.26687448794046  | 2.2205708 | 2.9219649 | 54.086044 | 44.735175 | 130.51077 | 23.080089 | 20.028114 | 215.39199 | 681.47155 | 692.80834 | MSTRG.10 | Non-coding  |
| MSTRG.10258 | 26.347841391209  | -1.74080485366473 | 0.0006152 | 0.0146443 | 28.449884 | 40.026209 | 33.525704 | 34.620134 | 42.917387 | 4.8952725 | 17.933461 | 8.4146762 | MSTRG.10 | Non-coding  |
| MSTRG.10330 | 36.7092794490616 | -1.93511310387568 | 0.0001046 | 0.0037913 | 42.518508 | 68.280004 | 58.669982 | 54.815212 | 28.611591 | 19.581090 | 7.1733847 | 14.024460 | MSTRG.10 | Non-coding  |
| MSTRG.10336 | 42.4253342240249 | -1.75184087380891 | 0.0006172 | 0.0146599 | 47.208050 | 71.811728 | 73.038140 | 40.390156 | 54.362024 | 29.371635 | 3.5866923 | 19.634244 | MSTRG.10 | Coding      |
| MSTRG.10371 | 17.1689597265618 | 1.80323076236212  | 0.0021622 | 0.0369446 | 5.0021774 | 5.8862072 | 4.7893862 | 17.310067 | 14.305795 | 26.923999 | 32.280231 | 30.853812 | MSTRG.10 | Coding      |
| MSTRG.1039  | 67.1655963090095 | 2.5009578191188   | 0.0002720 | 0.0079463 | 7.1906301 | 3.5317243 | 22.749584 | 54.815212 | 37.195069 | 90.562542 | 161.40115 | 159.87884 | MSTRG.10 | Non-coding  |
| MSTRG.10702 | 24.4194312770652 | 1.72648324461437  | 0.0001302 | 0.0045183 | 12.818079 | 17.658621 | 11.973465 | 11.540044 | 11.444636 | 36.714544 | 28.693539 | 64.512517 | MSTRG.10 | Coding      |
| MSTRG.10718 | 30.8044548029393 | 4.23690539575349  | 4.6437211 | 7.5944743 | 0.9379082 | 1.1772414 | 5.9867328 | 8.6550336 | 5.7223183 | 36.714544 | 125.53423 | 61.707625 | MSTRG.10 | Coding      |
| MSTRG.10723 | 31.3504820303647 | 2.1929345039965   | 1.7533067 | 1.7762703 | 7.8159023 | 14.126897 | 15.565505 | 17.310067 | 14.305795 | 53.847998 | 71.733847 | 56.097841 | MSTRG.10 | Coding      |
| MSTRG.1085  | 39.3353584550435 | 2.43394564208392  | 0.0001135 | 0.0040750 | 6.8779940 | 8.2406902 | 28.736317 | 11.540044 | 20.028114 | 24.476362 | 71.733847 | 143.04949 | MSTRG.10 | Non-coding  |
| MSTRG.1086  | 90.4109793755646 | 2.27602429843088  | 2.1823393 | 0.0011054 | 18.445529 | 20.013104 | 49.091209 | 28.850112 | 71.528979 | 70.981452 | 225.96162 | 238.41582 | MSTRG.10 | Non-coding  |
| MSTRG.11069 | 103.849778455515 | 1.15427314934611  | 0.0007351 | 0.0168995 | 82.848564 | 93.002075 | 67.051408 | 60.585235 | 51.500865 | 102.80072 | 154.22777 | 218.78158 | MSTRG.11 | Coding      |
| MSTRG.11082 | 6.02457171827278 | 3.82302805062873  | 6.5427707 | 0.0026133 | 1.2505443 | 0         | 1.1973465 | 0         | 2.8611591 | 7.3429088 | 21.520154 | 14.024460 | MSTRG.11 | Non-coding  |
| MSTRG.11137 | 11.2582134190813 | 2.94504088530364  | 0.0003762 | 0.0100625 | 1.5631804 | 1.1772414 | 1.1973465 | 8.6550336 | 5.7223183 | 14.685817 | 43.040308 | 14.024460 | MSTRG.11 | Non-coding  |
| MSTRG.11267 | 139.020023477381 | 1.26589502264156  | 0.0006716 | 0.0156898 | 65.966215 | 64.748280 | 74.235487 | 132.71051 | 120.16868 | 276.58290 | 240.30839 | 137.43971 | MSTRG.11 | Coding      |
| MSTRG.11271 | 65.1693040370033 | 1.13432288748803  | 0.0005790 | 0.0140138 | 53.460772 | 47.089658 | 51.485902 | 31.735123 | 40.056228 | 68.533816 | 111.18746 | 117.80546 | MSTRG.11 | Coding      |
| MSTRG.11285 | 45.8348172624639 | 1.90686296778209  | 0.0015545 | 0.0289852 | 15.319168 | 3.5317243 | 19.157545 | 40.390156 | 37.195069 | 68.533816 | 104.01407 | 78.536978 | MSTRG.11 | Coding      |
| MSTRG.1145  | 49.407804783259  | 1.27622434554888  | 0.0007538 | 0.0171919 | 42.205872 | 25.899312 | 32.328357 | 25.965100 | 34.333910 | 68.533816 | 53.800385 | 112.19568 | MSTRG.11 | Non-coding  |
| MSTRG.11468 | 31.1488484563498 | 1.72746625411363  | 0.0008686 | 0.0192352 | 11.880171 | 11.772414 | 21.552238 | 11.540044 | 28.611591 | 31.819271 | 39.453616 | 92.561438 | MSTRG.11 | Coding      |
| MSTRG.11529 | 347.286918637003 | -1.39953732893838 | 6.4267836 | 0.0004000 | 452.38442 | 351.99519 | 308.91541 | 637.58747 | 515.00865 | 154.20108 | 150.64108 | 207.56201 | MSTRG.11 | Coding      |
| MSTRG.11544 | 6.98568276212579 | 4.31571664898359  | 0.0029679 | 0.0463350 | 0         | 0         | 0         | 0         | 5.7223183 | 9.7905451 | 17.933461 | 22.439136 | MSTRG.11 | Non-coding  |
| MSTRG.11644 | 4.17404205253472 | 3.44920899388098  | 0.0028153 | 0.0443933 | 1.2505443 | 0         | 2.3946931 | 0         | 0         | 9.7905451 | 14.346769 | 5.6097841 | MSTRG.11 | Non-coding  |
| MSTRG.1165  | 174.405918423056 | 1.97542134075496  | 4.4378483 | 5.3420283 | 50.959683 | 68.280004 | 112.55057 | 75.010291 | 111.58520 | 215.39199 | 340.73577 | 420.73381 | MSTRG.11 | Coding      |
| MSTRG.11708 | 44.4000288617365 | -1.60061250214702 | 0.0002512 | 0.0075540 | 65.653579 | 74.166211 | 62.262021 | 37.505145 | 57.223183 | 19.581090 | 10.760077 | 28.048920 | MSTRG.11 | Coding      |
| MSTRG.11812 | 7.1059498741987  | 3.63719043939838  | 0.0028236 | 0.0444643 | 1.5631804 | 0         | 2.3946931 | 0         | 2.8611591 | 0         | 10.760077 | 39.268489 | MSTRG.11 | Non-coding  |
| MSTRG.11813 | 33.6156995297552 | 2.4279602460527   | 0.0001189 | 0.0042299 | 16.257076 | 12.949656 | 23.946931 | 2.8850112 | 5.7223183 | 24.476362 | 78.907232 | 103.78100 | MSTRG.11 | Coding      |
| MSTRG.11875 | 62.8392818253693 | 2.19381534367046  | 5.4498055 | 0.0022534 | 23.135070 | 38.848968 | 37.117743 | 5.7700224 | 28.611591 | 51.400362 | 132.70761 | 185.12287 | MSTRG.11 | Non-coding  |
| MSTRG.11950 | 4.82078746392761 | 4.24459201049335  | 0.0018683 | 0.0333156 | 0         | 0         | 1.1973465 | 0         | 2.8611591 | 4.8952725 | 7.1733847 | 22.439136 | MSTRG.11 | Non-coding  |
| MSTRG.11963 | 110.319483428115 | 1.93105593279849  | 4.5790448 | 0.0002978 | 84.724381 | 60.039314 | 59.867328 | 31.735123 | 28.611591 | 124.82945 | 240.30839 | 252.44028 | MSTRG.11 | Coding      |
| MSTRG.12038 | 27.4512134207264 | 3.59507864776226  | 6.8746784 | 7.0593899 | 3.7516331 | 4.7089658 | 5.9867328 | 5.7700224 | 8.5834775 | 48.952725 | 71.733847 | 70.122301 | MSTRG.12 | Coding      |
| MSTRG.12059 | 51.7552554297258 | -1.79299663407909 | 0.0005227 | 0.0130960 | 74.720026 | 76.520694 | 124.52404 | 43.275168 | 34.333910 | 14.685817 | 17.933461 | 28.048920 | MSTRG.12 | Coding      |
| MSTRG.12097 | 196.998272809262 | 2.13339398702031  | 3.7813324 | 0.0016901 | 56.899769 | 91.824833 | 102.97180 | 80.780313 | 103.00173 | 75.876725 | 444.74985 | 619.88114 | MSTRG.12 | Coding      |
| MSTRG.12199 | 14.3472000940391 | -4.14114458099756 | 0.0002083 | 0.0065342 | 23.135070 | 24.722070 | 13.170812 | 25.965100 | 22.889273 | 4.8952725 | 0         | 0         | MSTRG.12 | Coding      |
| MSTRG.12294 | 26.1760362473606 | 1.77227504642339  | 0.0011754 | 0.0240291 | 9.3790828 | 14.126897 | 4.7893862 | 20.195078 | 22.889273 | 29.371635 | 60.973770 | 47.683165 | MSTRG.12 | Coding      |
| MSTRG.12327 | 21.0319704392732 | 2.82805938647348  | 3.2282122 | 0.0014841 | 4.0642692 | 4.7089658 | 9.5787725 | 14.425056 | 0         | 24.476362 | 71.733847 | 39.268489 | MSTRG.12 | Coding      |
| MSTRG.12345 | 26.0583452876613 | 2.75320710473636  | 4.5188207 | 0.0019447 | 15.631804 | 7.0634487 | 8.3814260 | 2.8850112 | 5.7223183 | 17.133454 | 39.453616 | 112.19568 | MSTRG.12 | Non-coding  |

|             |                  |                   |           |           |           |           |           |           |           |           |           |           |          |            |
|-------------|------------------|-------------------|-----------|-----------|-----------|-----------|-----------|-----------|-----------|-----------|-----------|-----------|----------|------------|
| MSTRG.12423 | 186.867735389968 | 1.58551379607224  | 0.0008979 | 0.0197316 | 49.396502 | 52.975865 | 116.14261 | 184.64071 | 134.47448 | 181.12508 | 433.98977 | 342.19683 | MSTRG.12 | Coding     |
| MSTRG.1256  | 67.175085493971  | -1.085013839767   | 0.0019847 | 0.0349565 | 85.037017 | 101.24276 | 58.669982 | 89.435347 | 82.973616 | 48.952725 | 43.040308 | 28.048920 | MSTRG.12 | Non-coding |
| MSTRG.12620 | 20.1454734241869 | -2.04625048795037 | 0.0016132 | 0.0297675 | 14.381260 | 31.785519 | 39.512436 | 25.965100 | 28.611591 | 7.3429088 | 10.760077 | 2.8048920 | MSTRG.12 | Non-coding |
| MSTRG.12644 | 37.0012575006266 | 2.1893607487542   | 0.0002004 | 0.0064095 | 7.5032662 | 5.8862072 | 16.762852 | 31.735123 | 20.028114 | 63.638543 | 111.18746 | 39.268489 | MSTRG.12 | Coding     |
| MSTRG.12694 | 83.3978751450318 | 1.66240120256823  | 1.5187675 | 0.0001163 | 50.334411 | 45.912416 | 65.854061 | 34.620134 | 31.472751 | 105.24836 | 154.22777 | 179.51309 | MSTRG.12 | Non-coding |
| MSTRG.12900 | 7.41606322295415 | 4.98171970372025  | 6.2353852 | 0.0025223 | 0         | 0         | 1.1973465 | 2.8850112 | 0         | 4.8952725 | 25.106846 | 25.244028 | MSTRG.12 | Non-coding |
| MSTRG.12973 | 58.020279551379  | 1.48472613479677  | 3.8413753 | 0.0016992 | 36.891059 | 32.962760 | 46.696516 | 25.965100 | 28.611591 | 93.010179 | 132.70761 | 67.317409 | MSTRG.12 | Coding     |
| MSTRG.13    | 82.1801971903671 | 1.02561413944151  | 0.0009545 | 0.0206191 | 63.465127 | 57.684831 | 61.064675 | 57.700224 | 57.223183 | 70.981452 | 143.46769 | 145.85438 | MSTRG.13 | Non-coding |
| MSTRG.13071 | 149.860891328447 | -1.71789403800099 | 1.2382012 | 1.3124932 | 253.54787 | 233.09380 | 170.02321 | 152.90559 | 206.00346 | 48.952725 | 50.213693 | 84.146762 | MSTRG.13 | Coding     |
| MSTRG.13135 | 5.8604942128477  | 3.13882486765287  | 0.0008676 | 0.0192352 | 0.6252721 | 1.1772414 | 1.1973465 | 0         | 5.7223183 | 9.7905451 | 14.346769 | 14.024460 | MSTRG.13 | Non-coding |
| MSTRG.13182 | 4.52356451888711 | 3.88894584641907  | 0.0011313 | 0.0233786 | 0.3126360 | 1.1772414 | 0         | 0         | 2.8611591 | 14.685817 | 14.346769 | 2.8048920 | MSTRG.13 | Non-coding |
| MSTRG.13218 | 89.4090363501278 | 2.31885077662771  | 0.0001763 | 0.0057198 | 18.132893 | 58.862072 | 58.669982 | 8.6550336 | 34.333910 | 53.847998 | 233.13500 | 249.63539 | MSTRG.13 | Coding     |
| MSTRG.1323  | 28.9120015216253 | 3.23535555337459  | 3.8740619 | 0.0016992 | 1.8758165 | 1.1772414 | 8.3814260 | 14.425056 | 11.444636 | 19.581090 | 53.800385 | 120.61035 | MSTRG.13 | Non-coding |
| MSTRG.13265 | 520.263222281239 | 4.88037732580672  | 4.0621397 | 3.8460785 | 10.004354 | 8.2406902 | 107.76119 | 25.965100 | 71.528979 | 428.33635 | 2026.4812 | 1483.7879 | MSTRG.13 | Non-coding |
| MSTRG.13291 | 10.0927211632899 | 2.73530615866988  | 0.0029786 | 0.0463350 | 0.3126360 | 1.1772414 | 4.7893862 | 8.6550336 | 2.8611591 | 9.7905451 | 25.106846 | 28.048920 | MSTRG.13 | Coding     |
| MSTRG.13294 | 50.0493424200377 | 2.17269295190976  | 2.9460393 | 0.0013765 | 5.6274496 | 17.658621 | 32.328357 | 28.850112 | 25.750432 | 102.80072 | 100.42738 | 86.951654 | MSTRG.13 | Coding     |
| MSTRG.13316 | 7.66709297585889 | 6.12493278691019  | 2.9868474 | 0.0002072 | 0         | 0         | 0         | 0         | 2.8611591 | 7.3429088 | 28.693539 | 22.439136 | MSTRG.13 | Non-coding |
| MSTRG.13453 | 112.42125796002  | 1.24627913231836  | 0.0005719 | 0.0139023 | 100.66882 | 93.002075 | 76.630180 | 46.160179 | 51.500865 | 178.67744 | 125.53423 | 227.19625 | MSTRG.13 | Coding     |
| MSTRG.13470 | 26.4946564947531 | -2.52180578138922 | 1.3262997 | 0.0007162 | 43.143780 | 50.621382 | 33.525704 | 34.620134 | 28.611591 | 12.238181 | 3.5866923 | 5.6097841 | MSTRG.13 | Coding     |
| MSTRG.13506 | 8.83386394156974 | 3.72097152829174  | 0.0009860 | 0.0210603 | 2.5010887 | 0         | 2.3946931 | 0         | 2.8611591 | 2.4476362 | 7.1733847 | 53.292949 | MSTRG.13 | Non-coding |
| MSTRG.13507 | 191.322293495067 | 1.92261404505136  | 0.0001310 | 0.0045318 | 92.852919 | 111.83793 | 158.04974 | 40.390156 | 62.945502 | 151.75345 | 301.28216 | 611.46647 | MSTRG.13 | Non-coding |
| MSTRG.13511 | 6.68267244830812 | 4.13658938443479  | 0.0021818 | 0.0370043 | 0.9379082 | 0         | 1.1973465 | 0         | 2.8611591 | 0         | 3.5866923 | 44.878273 | MSTRG.13 | Non-coding |
| MSTRG.13570 | 109.476941180148 | 1.10587710747489  | 5.7864964 | 0.0023743 | 85.662289 | 81.229660 | 58.669982 | 69.240268 | 85.834775 | 200.70617 | 154.22777 | 140.24460 | MSTRG.13 | Non-coding |
| MSTRG.13590 | 18.7187515567982 | -2.69526464029838 | 0.0015545 | 0.0289852 | 16.882349 | 30.608277 | 21.552238 | 25.965100 | 40.056228 | 14.685817 | 0         | 0         | MSTRG.13 | Non-coding |
| MSTRG.13618 | 116.657167817302 | 2.45323709697352  | 4.3050546 | 1.0952058 | 34.702606 | 52.975865 | 47.893862 | 34.620134 | 48.639706 | 127.27708 | 197.26808 | 389.87999 | MSTRG.13 | Non-coding |
| MSTRG.13627 | 32.9510969809466 | -2.4049681213794  | 3.8615379 | 0.0016992 | 48.458594 | 62.393797 | 26.341624 | 43.275168 | 54.362024 | 19.581090 | 3.5866923 | 5.6097841 | MSTRG.13 | Non-coding |
| MSTRG.13675 | 4.75458492395084 | -4.50589359618712 | 0.0023846 | 0.0392305 | 9.3790828 | 2.3544829 | 11.973465 | 2.8850112 | 11.444636 | 0         | 0         | 0         | MSTRG.13 | Coding     |
| MSTRG.13974 | 67.3985678389295 | -1.18911431914831 | 0.0022761 | 0.0380672 | 100.35618 | 102.42000 | 65.854061 | 86.550336 | 71.528979 | 44.057453 | 17.933461 | 50.488057 | MSTRG.13 | Coding     |
| MSTRG.14050 | 48.2079189573675 | 1.43320218238771  | 0.0001177 | 0.0042131 | 24.385615 | 34.140002 | 34.723050 | 37.505145 | 17.166955 | 56.295634 | 86.080617 | 95.366330 | MSTRG.14 | Coding     |
| MSTRG.14158 | 15.8174722770251 | 2.96977033951821  | 3.0712589 | 0.0002118 | 7.8159023 | 2.3544829 | 4.7893862 | 2.8850112 | 2.8611591 | 17.133454 | 46.627001 | 42.073381 | MSTRG.14 | Coding     |
| MSTRG.14168 | 58.4905068156298 | 2.66200287123583  | 9.1202735 | 0.0005326 | 11.880171 | 20.013104 | 23.946931 | 14.425056 | 28.611591 | 19.581090 | 136.29431 | 213.17179 | MSTRG.14 | Coding     |
| MSTRG.14209 | 72.7444431086125 | 4.33610462765936  | 7.3997798 | 7.0593899 | 6.5653579 | 10.595173 | 5.9867328 | 11.540044 | 11.444636 | 51.400362 | 150.64108 | 333.78215 | MSTRG.14 | Non-coding |
| MSTRG.14246 | 399.618793100181 | 4.72027637003845  | 8.8749321 | 7.2056896 | 9.0664467 | 5.8862072 | 81.419566 | 23.080089 | 71.528979 | 350.01198 | 1517.1708 | 1138.7861 | MSTRG.14 | Non-coding |
| MSTRG.14247 | 85.3323591902569 | 3.04163376866251  | 5.8573002 | 0.0023947 | 3.7516331 | 7.0634487 | 26.341624 | 40.390156 | 40.056228 | 36.714544 | 326.38900 | 201.95222 | MSTRG.14 | Non-coding |
| MSTRG.1425  | 116.23533656014  | 1.41703800600567  | 0.0006608 | 0.0155355 | 34.077334 | 49.444141 | 93.393032 | 103.86040 | 80.112457 | 129.72472 | 200.85477 | 238.41582 | MSTRG.14 | Non-coding |
| MSTRG.14306 | 59.9667883980806 | 1.97476572086068  | 2.6868004 | 0.0012816 | 15.631804 | 25.899312 | 21.552238 | 54.815212 | 28.611591 | 61.190907 | 154.22777 | 117.80546 | MSTRG.14 | Coding     |
| MSTRG.14396 | 19.48816117189   | 3.14001429617924  | 0.0031681 | 0.0484877 | 5.6274496 | 0         | 15.565505 | 2.8850112 | 0         | 9.7905451 | 32.280231 | 89.756546 | MSTRG.14 | Non-coding |
| MSTRG.14630 | 24.3962476829159 | 3.82406912197516  | 6.3642524 | 5.6920283 | 3.1263609 | 0         | 4.7893862 | 8.6550336 | 5.7223183 | 17.133454 | 96.840694 | 58.902733 | MSTRG.14 | Coding     |
| MSTRG.14834 | 258.568871114078 | 1.63176543507337  | 1.5873600 | 1.0689469 | 138.81042 | 170.70001 | 148.47097 | 118.28545 | 145.91911 | 403.85998 | 502.13693 | 440.36805 | MSTRG.14 | Coding     |
| MSTRG.14898 | 47.4722843110472 | 2.13617227468522  | 1.6284372 | 0.0001226 | 16.882349 | 22.367587 | 32.328357 | 25.965100 | 5.7223183 | 100.35308 | 100.42738 | 75.732085 | MSTRG.14 | Non-coding |

|             |                  |                   |           |           |           |           |           |           |           |           |           |           |                     |
|-------------|------------------|-------------------|-----------|-----------|-----------|-----------|-----------|-----------|-----------|-----------|-----------|-----------|---------------------|
| MSTRG.14910 | 222.440998820715 | 2.51626186360889  | 7.0999906 | 1.6587896 | 61.589310 | 57.684831 | 51.485902 | 126.94049 | 108.72404 | 249.65890 | 534.41716 | 589.02733 | MSTRG.14 Coding     |
| MSTRG.15016 | 23.1467384294139 | 2.46304118880503  | 6.5250528 | 0.0026133 | 5.0021774 | 7.0634487 | 7.1840794 | 8.6550336 | 17.166955 | 19.581090 | 89.667309 | 30.853812 | MSTRG.15 Coding     |
| MSTRG.15029 | 92.4779361416288 | 1.20389140486586  | 0.0002949 | 0.0084196 | 55.649224 | 54.153107 | 96.985072 | 51.930201 | 51.500865 | 115.03890 | 143.46769 | 171.09841 | MSTRG.15 Non-coding |
| MSTRG.1506  | 50.5839677067897 | 3.42512827285316  | 1.2352784 | 1.3124932 | 15.319168 | 17.658621 | 13.170812 | 2.8850112 | 2.8611591 | 31.819271 | 147.05438 | 173.90330 | MSTRG.15 Non-coding |
| MSTRG.15132 | 58.3801861261031 | -1.37408383885189 | 0.0013271 | 0.0262861 | 99.418277 | 68.280004 | 51.485902 | 98.090380 | 60.084342 | 46.505089 | 17.933461 | 25.244028 | MSTRG.15 Coding     |
| MSTRG.15247 | 9.93335709986233 | 3.3589195943649   | 0.0005997 | 0.0143940 | 0.6252721 | 0         | 1.1973465 | 2.8850112 | 8.5834775 | 12.238181 | 28.693539 | 25.244028 | MSTRG.15 Non-coding |
| MSTRG.15263 | 4.21075236604528 | -4.35107813762426 | 0.0025139 | 0.0407853 | 10.316991 | 7.0634487 | 4.7893862 | 8.6550336 | 2.8611591 | 0         | 0         | 0         | MSTRG.15 Non-coding |
| MSTRG.1531  | 26.8888303425787 | 1.2556672757607   | 0.0031993 | 0.0487465 | 22.197162 | 15.304138 | 13.170812 | 11.540044 | 25.750432 | 44.057453 | 46.627001 | 36.463596 | MSTRG.15 Non-coding |
| MSTRG.15384 | 25.9305777982556 | 1.82298213682863  | 0.0023746 | 0.0391708 | 9.6917189 | 5.8862072 | 17.960198 | 5.7700224 | 28.611591 | 24.476362 | 64.560463 | 50.488057 | MSTRG.15 Coding     |
| MSTRG.15402 | 61.9435443711648 | 2.37764924369109  | 1.9708266 | 0.0010209 | 31.576245 | 38.848968 | 27.538971 | 5.7700224 | 14.305795 | 51.400362 | 157.81446 | 168.29352 | MSTRG.15 Coding     |
| MSTRG.15407 | 72.8978682057443 | 2.10805597487454  | 1.0643439 | 3.2931376 | 26.574067 | 27.076553 | 41.907130 | 25.965100 | 42.917387 | 112.59126 | 143.46769 | 162.68374 | MSTRG.15 Non-coding |
| MSTRG.15443 | 6.78155588318631 | -5.01834251415838 | 0.0004803 | 0.0121922 | 4.3769053 | 24.722070 | 10.776119 | 8.6550336 | 5.7223183 | 0         | 0         | 0         | MSTRG.15 Non-coding |
| MSTRG.15489 | 14.3292326828031 | 4.68151352253114  | 1.0404922 | 1.5469552 | 0.9379082 | 1.1772414 | 2.3946931 | 0         | 2.8611591 | 7.3429088 | 46.627001 | 53.292949 | MSTRG.15 Non-coding |
| MSTRG.15494 | 88.3385821267164 | -2.3251967281943  | 3.2757582 | 4.0761826 | 125.36707 | 191.89035 | 137.69485 | 100.97539 | 74.390138 | 24.476362 | 32.280231 | 19.634244 | MSTRG.15 Non-coding |
| MSTRG.15508 | 17.8607989626715 | 2.95748414247524  | 0.0002402 | 0.0072964 | 1.5631804 | 2.3544829 | 13.170812 | 2.8850112 | 5.7223183 | 17.133454 | 21.520154 | 78.536978 | MSTRG.15 Non-coding |
| MSTRG.1571  | 310.462754578185 | -1.00691806149363 | 0.0011030 | 0.0230010 | 449.57070 | 502.68210 | 371.17743 | 276.96107 | 309.00519 | 252.10653 | 139.88100 | 182.31798 | MSTRG.15 Non-coding |
| MSTRG.15997 | 108.958102856118 | 4.14019812197804  | 7.9327214 | 3.2433498 | 14.693896 | 22.367587 | 9.5787725 | 11.540044 | 17.166955 | 41.609816 | 258.24185 | 496.46589 | MSTRG.15 Non-coding |
| MSTRG.16001 | 5.90644453787889 | 3.9615003138447   | 2.3610877 | 0.0011650 | 0.9379082 | 1.1772414 | 0         | 0         | 2.8611591 | 14.685817 | 10.760077 | 16.829352 | MSTRG.16 Coding     |
| MSTRG.16103 | 314.741021242418 | 1.54405821377647  | 1.5322793 | 0.0008158 | 94.728736 | 128.31931 | 191.57545 | 250.99597 | 254.64316 | 565.40398 | 502.13693 | 530.12460 | MSTRG.16 Non-coding |
| MSTRG.16110 | 9.0648076168331  | -3.51983157334874 | 0.0031782 | 0.0485774 | 10.942263 | 9.4179316 | 22.749584 | 8.6550336 | 17.166955 | 0         | 3.5866923 | 0         | MSTRG.16 Coding     |
| MSTRG.16157 | 3.33430563421648 | 4.08040966481124  | 0.0011743 | 0.0240291 | 0.6252721 | 0         | 1.1973465 | 0         | 0         | 4.8952725 | 14.346769 | 5.6097841 | MSTRG.16 Non-coding |
| MSTRG.16206 | 44.2507405759657 | -2.0517759723044  | 1.0403754 | 0.0005800 | 68.467304 | 68.280004 | 34.723050 | 57.700224 | 80.112457 | 17.133454 | 10.760077 | 16.829352 | MSTRG.16 Non-coding |
| MSTRG.16271 | 53.0820595315971 | -2.70557033563999 | 2.2499684 | 0.0011198 | 64.715671 | 90.647592 | 41.907130 | 92.320358 | 97.279412 | 29.371635 | 0         | 8.4146762 | MSTRG.16 Coding     |
| MSTRG.16373 | 57.8397399340817 | -1.66201881798257 | 1.0437429 | 0.0005800 | 83.473837 | 77.697936 | 52.683249 | 77.895302 | 97.279412 | 26.923999 | 21.520154 | 25.244028 | MSTRG.16 Coding     |
| MSTRG.16407 | 122.872863940034 | 1.77847685316272  | 9.5776017 | 2.1498898 | 51.272319 | 57.684831 | 87.406299 | 69.240268 | 57.223183 | 188.46799 | 208.02815 | 263.65985 | MSTRG.16 Non-coding |
| MSTRG.16496 | 14.1191468094925 | -2.71648361978332 | 0.0006511 | 0.0154025 | 22.509798 | 27.076553 | 17.960198 | 17.310067 | 17.166955 | 7.3429088 | 3.5866923 | 0         | MSTRG.16 Coding     |
| MSTRG.16514 | 35.0679381793218 | -2.31060069508571 | 0.0008801 | 0.0194363 | 33.139425 | 65.925521 | 45.499169 | 83.665324 | 22.889273 | 9.7905451 | 0         | 19.634244 | MSTRG.16 Non-coding |
| MSTRG.16583 | 23.4102692493216 | -1.62406896735706 | 0.0020604 | 0.0357912 | 27.511976 | 28.253794 | 35.920397 | 34.620134 | 28.611591 | 19.581090 | 7.1733847 | 5.6097841 | MSTRG.16 Coding     |
| MSTRG.16628 | 18.1796648332076 | -2.06889515087107 | 0.0027253 | 0.0433939 | 13.443352 | 27.076553 | 26.341624 | 34.620134 | 25.750432 | 9.7905451 | 0         | 8.4146762 | MSTRG.16 Non-coding |
| MSTRG.16648 | 827.631045393801 | 4.42136301569224  | 1.3225926 | 1.0094026 | 42.518508 | 36.494485 | 213.12768 | 51.930201 | 134.47448 | 790.58652 | 2973.3679 | 2378.5484 | MSTRG.16 Coding     |
| MSTRG.16749 | 57.5859012832557 | 2.2389664022543   | 2.2006141 | 0.0011098 | 28.449884 | 15.304138 | 20.354891 | 17.310067 | 40.056228 | 31.819271 | 136.29431 | 171.09841 | MSTRG.16 Coding     |
| MSTRG.1679  | 190.502927957739 | 2.1799144420228   | 1.0215260 | 0.0005732 | 43.769053 | 36.494485 | 75.432834 | 124.05548 | 134.47448 | 183.57272 | 401.70954 | 524.51481 | MSTRG.16 Coding     |
| MSTRG.16811 | 24.3870440958924 | -2.28280585020347 | 2.9816092 | 0.0013819 | 30.638337 | 41.203451 | 35.920397 | 31.735123 | 34.333910 | 4.8952725 | 10.760077 | 5.6097841 | MSTRG.16 Non-coding |
| MSTRG.16936 | 55.854772881158  | 2.00383036281551  | 0.0018445 | 0.0330465 | 17.194985 | 3.5317243 | 23.946931 | 49.045190 | 40.056228 | 56.295634 | 161.40115 | 95.366330 | MSTRG.16 Non-coding |
| MSTRG.1703  | 31.606305920136  | 2.25034346969136  | 3.7943556 | 0.0016901 | 7.5032662 | 11.772414 | 16.762852 | 14.425056 | 17.166955 | 22.028726 | 53.800385 | 109.39079 | MSTRG.17 Non-coding |
| MSTRG.17266 | 52.3918433560299 | 1.30952873522092  | 0.0009417 | 0.0204581 | 28.449884 | 42.380692 | 41.907130 | 14.425056 | 40.056228 | 90.562542 | 96.840694 | 64.512517 | MSTRG.17 Coding     |
| MSTRG.17758 | 41.7802755589602 | 1.93285850993852  | 0.0001547 | 0.0052255 | 20.321346 | 21.190346 | 20.354891 | 34.620134 | 5.7223183 | 44.057453 | 64.560463 | 123.41525 | MSTRG.17 Coding     |
| MSTRG.17805 | 11.3295609740026 | -3.11753223380014 | 0.0024693 | 0.0402695 | 20.008709 | 21.190346 | 19.157545 | 5.7700224 | 17.166955 | 7.3429088 | 0         | 0         | MSTRG.17 Coding     |
| MSTRG.17907 | 15.2789365142329 | -2.89984829430114 | 0.0006530 | 0.0154146 | 34.077334 | 30.608277 | 21.552238 | 11.540044 | 14.305795 | 7.3429088 | 0         | 2.8048920 | MSTRG.17 Coding     |
| MSTRG.17916 | 34.0023861957077 | 1.6204391698881   | 8.0547871 | 0.0004827 | 18.132893 | 14.126897 | 19.157545 | 25.965100 | 20.028114 | 56.295634 | 53.800385 | 64.512517 | MSTRG.17 Coding     |

|             |                  |                   |           |           |           |           |           |           |           |           |           |           |          |            |
|-------------|------------------|-------------------|-----------|-----------|-----------|-----------|-----------|-----------|-----------|-----------|-----------|-----------|----------|------------|
| MSTRG.17940 | 185.382853715502 | -1.20033285821274 | 0.0003206 | 0.0090202 | 335.14589 | 182.47242 | 159.24709 | 262.53601 | 234.61505 | 127.27708 | 100.42738 | 81.341870 | MSTRG.17 | Coding     |
| MSTRG.18029 | 16.5709058320479 | 5.66293973975714  | 1.7173083 | 3.2083738 | 0.3126360 | 0         | 3.5920397 | 0         | 0         | 22.028726 | 64.560463 | 42.073381 | MSTRG.18 | Non-coding |
| MSTRG.18100 | 73.223420124585  | 1.2715334088552   | 5.4721551 | 0.0022534 | 50.334411 | 38.848968 | 41.907130 | 37.505145 | 71.528979 | 119.93417 | 121.94754 | 103.78100 | MSTRG.18 | Coding     |
| MSTRG.18108 | 3.84678081897088 | 5.60752229260846  | 2.5974290 | 0.0012599 | 0.3126360 | 0         | 0         | 0         | 0         | 4.8952725 | 14.346769 | 11.219568 | MSTRG.18 | Non-coding |
| MSTRG.18126 | 62.2402170710826 | -3.48862099687903 | 2.1387920 | 1.1129496 | 110.36054 | 114.19242 | 77.827527 | 69.240268 | 100.14057 | 9.7905451 | 10.760077 | 5.6097841 | MSTRG.18 | Coding     |
| MSTRG.18156 | 4.62096906350044 | 4.19856025020686  | 0.0013017 | 0.0258491 | 0         | 0         | 1.1973465 | 0         | 2.8611591 | 7.3429088 | 14.346769 | 11.219568 | MSTRG.18 | Non-coding |
| MSTRG.18158 | 45.2442506074553 | 1.52748917890022  | 0.0007898 | 0.0179307 | 21.571890 | 15.304138 | 26.341624 | 51.930201 | 20.028114 | 51.400362 | 96.840694 | 78.536978 | MSTRG.18 | Non-coding |
| MSTRG.18161 | 4.62096906350044 | 4.19856025020686  | 0.0013017 | 0.0258491 | 0         | 0         | 1.1973465 | 0         | 2.8611591 | 7.3429088 | 14.346769 | 11.219568 | MSTRG.18 | Non-coding |
| MSTRG.18265 | 83.5318877149109 | 1.49238277179829  | 0.0001006 | 0.0036938 | 50.021774 | 37.671726 | 82.616913 | 40.390156 | 37.195069 | 93.010179 | 150.64108 | 176.70820 | MSTRG.18 | Non-coding |
| MSTRG.18293 | 159.390888175671 | -1.30914013521183 | 3.3743405 | 0.0015390 | 162.88340 | 162.45932 | 245.45604 | 279.84608 | 177.39186 | 80.771997 | 68.147155 | 98.171222 | MSTRG.18 | Coding     |
| MSTRG.18394 | 12.6082489822775 | 2.5084746835576   | 0.0010085 | 0.0214376 | 8.4411745 | 5.8862072 | 3.5920397 | 2.8850112 | 0         | 44.057453 | 10.760077 | 25.244028 | MSTRG.18 | Non-coding |
| MSTRG.18420 | 92.5511271413066 | -1.2621208411112  | 0.0006061 | 0.0144857 | 120.99016 | 125.96483 | 110.15588 | 95.205369 | 137.33564 | 80.771997 | 25.106846 | 44.878273 | MSTRG.18 | Coding     |
| MSTRG.18453 | 18.7382648364393 | 1.80510742347381  | 0.0002639 | 0.0077877 | 11.567535 | 11.772414 | 9.5787725 | 11.540044 | 2.8611591 | 31.819271 | 28.693539 | 42.073381 | MSTRG.18 | Coding     |
| MSTRG.1859  | 27.1149329695937 | -1.47285962013374 | 0.0021771 | 0.0370043 | 29.075156 | 32.962760 | 35.920397 | 31.735123 | 48.639706 | 12.238181 | 17.933461 | 8.4146762 | MSTRG.18 | Coding     |
| MSTRG.18646 | 56.0356713691764 | 1.3665239453851   | 0.0001973 | 0.0063271 | 25.010887 | 24.722070 | 37.117743 | 40.390156 | 51.500865 | 105.24836 | 71.733847 | 92.561438 | MSTRG.18 | Non-coding |
| MSTRG.18867 | 207.462517475999 | 1.15295456061599  | 0.0002253 | 0.0069299 | 155.69277 | 142.44621 | 107.76119 | 170.21566 | 137.33564 | 186.02035 | 347.90916 | 412.31913 | MSTRG.18 | Non-coding |
| MSTRG.18879 | 26.3622385637814 | 3.05923182257652  | 0.0002552 | 0.0076306 | 0.6252721 | 2.3544829 | 5.9867328 | 8.6550336 | 20.028114 | 39.162180 | 100.42738 | 33.658704 | MSTRG.18 | Non-coding |
| MSTRG.18917 | 20.2019746571227 | 2.60391695852853  | 0.0024674 | 0.0402695 | 2.1884526 | 1.1772414 | 2.3946931 | 23.080089 | 8.5834775 | 19.581090 | 68.147155 | 36.463596 | MSTRG.18 | Non-coding |
| MSTRG.18967 | 235.234346497329 | 1.07541517161172  | 0.0026793 | 0.0429592 | 114.11217 | 89.470350 | 177.20729 | 248.11096 | 206.00346 | 318.19271 | 383.77608 | 345.00172 | MSTRG.18 | Coding     |
| MSTRG.18995 | 11.7266945986053 | 2.54097832585074  | 0.0004246 | 0.0110247 | 3.4389970 | 1.1772414 | 5.9867328 | 5.7700224 | 5.7223183 | 7.3429088 | 25.106846 | 39.268489 | MSTRG.18 | Coding     |
| MSTRG.19011 | 99.9019017602071 | 5.07398123973279  | 1.1860768 | 9.6987199 | 10.004354 | 7.0634487 | 1.1973465 | 14.425056 | 5.7223183 | 58.743271 | 286.93539 | 415.12402 | MSTRG.19 | Non-coding |
| MSTRG.19078 | 106.14562112637  | 2.23296478853037  | 1.6820827 | 0.0008873 | 32.201517 | 45.912416 | 67.051408 | 43.275168 | 34.333910 | 46.505089 | 279.76200 | 300.12345 | MSTRG.19 | Coding     |
| MSTRG.19160 | 186.562180363938 | 1.19302665304299  | 9.5058631 | 0.0035332 | 122.55334 | 93.002075 | 95.787725 | 178.87069 | 143.05795 | 222.73490 | 333.56239 | 302.92834 | MSTRG.19 | Coding     |
| MSTRG.19162 | 4.20948363790778 | 2.94752291105437  | 0.0032456 | 0.0493150 | 1.5631804 | 1.1772414 | 2.3946931 | 0         | 0         | 7.3429088 | 7.1733847 | 14.024460 | MSTRG.19 | Non-coding |
| MSTRG.19234 | 47.5002493760027 | 2.72970869193974  | 8.3651316 | 9.2080794 | 15.631804 | 11.772414 | 27.538971 | 2.8850112 | 17.166955 | 75.876725 | 86.080617 | 143.04949 | MSTRG.19 | Non-coding |
| MSTRG.19335 | 44.6816617525564 | -1.05556469341074 | 0.0029832 | 0.0463350 | 60.651402 | 55.330348 | 56.275288 | 46.160179 | 57.223183 | 34.266908 | 25.106846 | 22.439136 | MSTRG.19 | Coding     |
| MSTRG.19372 | 159.522715500807 | -1.57643366603643 | 0.0006586 | 0.0155145 | 151.62850 | 347.28623 | 283.77113 | 124.05548 | 157.36375 | 44.057453 | 50.213693 | 117.80546 | MSTRG.19 | Non-coding |
| MSTRG.19516 | 8.41013693852369 | 2.56969988084346  | 0.0031911 | 0.0487100 | 2.1884526 | 0         | 2.3946931 | 8.6550336 | 2.8611591 | 22.028726 | 17.933461 | 11.219568 | MSTRG.19 | Non-coding |
| MSTRG.1954  | 2.74665139327179 | 4.14224519374338  | 0.0015716 | 0.0291605 | 0.3126360 | 1.1772414 | 0         | 0         | 0         | 4.8952725 | 7.1733847 | 8.4146762 | MSTRG.19 | Non-coding |
| MSTRG.1955  | 48.4199549168501 | 2.40428708411545  | 4.9377757 | 0.0003175 | 22.822434 | 18.835863 | 21.552238 | 20.195078 | 8.5834775 | 26.923999 | 150.64108 | 117.80546 | MSTRG.19 | Non-coding |
| MSTRG.19584 | 20.1542524730588 | 2.48745292064911  | 6.1059267 | 0.0003861 | 6.5653579 | 4.7089658 | 7.1840794 | 14.425056 | 5.7223183 | 19.581090 | 60.973770 | 42.073381 | MSTRG.19 | Coding     |
| MSTRG.19590 | 248.038438740502 | -1.78794314919511 | 1.6827764 | 3.2083738 | 284.49884 | 324.91864 | 293.34991 | 447.17673 | 340.47794 | 119.93417 | 64.560463 | 109.39079 | MSTRG.19 | Coding     |
| MSTRG.19601 | 80.8095315815346 | 1.52957759777091  | 0.0015957 | 0.0295598 | 31.263609 | 83.584143 | 61.064675 | 25.965100 | 34.333910 | 66.086179 | 150.64108 | 193.53755 | MSTRG.19 | Non-coding |
| MSTRG.19702 | 170.875050631375 | 2.20851335247143  | 8.1843216 | 6.7894285 | 93.790828 | 64.748280 | 93.393032 | 49.045190 | 60.084342 | 112.59126 | 405.29624 | 488.05122 | MSTRG.19 | Coding     |
| MSTRG.19714 | 20.9627678528213 | -5.67531230773138 | 5.2975414 | 0.0022133 | 39.392147 | 62.393797 | 49.091209 | 8.6550336 | 5.7223183 | 2.4476362 | 0         | 0         | MSTRG.19 | Coding     |
| MSTRG.19757 | 121.803353277285 | -3.29396265875713 | 1.8859649 | 4.3181053 | 236.97815 | 233.09380 | 150.86566 | 147.13557 | 148.78027 | 22.028726 | 21.520154 | 14.024460 | MSTRG.19 | Non-coding |
| MSTRG.19769 | 38.4674964287418 | 1.23747892811699  | 0.0031638 | 0.0484870 | 27.824612 | 21.190346 | 37.117743 | 17.310067 | 22.889273 | 44.057453 | 89.667309 | 47.683165 | MSTRG.19 | Coding     |
| MSTRG.19919 | 90.7910348793968 | -1.45362625720586 | 2.9242159 | 0.0013719 | 116.30062 | 110.66069 | 106.56384 | 173.10067 | 88.695934 | 53.847998 | 32.280231 | 44.878273 | MSTRG.19 | Non-coding |
| MSTRG.1997  | 60.1878153602319 | -1.01729538210235 | 0.0013672 | 0.0266506 | 66.278851 | 64.748280 | 82.616913 | 80.780313 | 77.251297 | 36.714544 | 39.453616 | 33.658704 | MSTRG.19 | Non-coding |
| MSTRG.20145 | 69.561724869155  | -1.37504382595145 | 0.0004411 | 0.0113754 | 105.98363 | 93.002075 | 100.57711 | 75.010291 | 74.390138 | 58.743271 | 17.933461 | 30.853812 | MSTRG.20 | Coding     |

|             |                  |                   |           |           |           |           |           |           |           |           |           |           |          |            |
|-------------|------------------|-------------------|-----------|-----------|-----------|-----------|-----------|-----------|-----------|-----------|-----------|-----------|----------|------------|
| MSTRG.20166 | 57.072948973569  | -1.64540417241466 | 0.0002533 | 0.0075915 | 65.966215 | 82.406902 | 80.222220 | 57.700224 | 97.279412 | 29.371635 | 7.1733847 | 36.463596 | MSTRG.20 | Coding     |
| MSTRG.20176 | 36.0689642893858 | 2.02309435993648  | 7.8052128 | 6.6792529 | 17.820257 | 15.304138 | 14.368158 | 14.425056 | 22.889273 | 41.609816 | 100.42738 | 61.707625 | MSTRG.20 | Coding     |
| MSTRG.20348 | 54.6787736369626 | 1.07810967689502  | 0.0016931 | 0.0309410 | 27.511976 | 32.962760 | 43.104476 | 49.045190 | 42.917387 | 68.533816 | 100.42738 | 72.927193 | MSTRG.20 | Coding     |
| MSTRG.20420 | 194.355526884072 | -1.20542793404189 | 0.0001591 | 0.0052949 | 344.83761 | 198.95380 | 164.03648 | 262.53601 | 263.22664 | 100.35308 | 125.53423 | 95.366330 | MSTRG.20 | Coding     |
| MSTRG.20565 | 58.3868351071418 | 1.10659407202573  | 0.0029618 | 0.0463213 | 35.953150 | 29.431036 | 33.525704 | 51.930201 | 54.362024 | 122.38181 | 60.973770 | 78.536978 | MSTRG.20 | Non-coding |
| MSTRG.20656 | 12.385543050567  | 2.22880219529155  | 0.0020484 | 0.0357480 | 3.1263609 | 2.3544829 | 9.5787725 | 5.7700224 | 5.7223183 | 14.685817 | 46.627001 | 11.219568 | MSTRG.20 | Non-coding |
| MSTRG.20766 | 66.5906439586385 | 1.49763552881672  | 2.9543298 | 2.8662007 | 36.891059 | 38.848968 | 43.104476 | 43.275168 | 37.195069 | 83.219633 | 118.36084 | 131.82992 | MSTRG.20 | Coding     |
| MSTRG.20799 | 52.3429636428118 | 1.49299679678824  | 0.0027125 | 0.0432491 | 18.758165 | 27.076553 | 37.117743 | 20.195078 | 54.362024 | 44.057453 | 147.05438 | 70.122301 | MSTRG.20 | Coding     |
| MSTRG.20953 | 20.1153268362998 | 2.63160034375687  | 0.0002206 | 0.0068259 | 2.5010887 | 1.1772414 | 9.5787725 | 17.310067 | 5.7223183 | 36.714544 | 43.040308 | 44.878273 | MSTRG.20 | Non-coding |
| MSTRG.20957 | 34.255799753268  | 1.45360297304501  | 0.0009502 | 0.0205643 | 20.946618 | 24.722070 | 29.933664 | 17.310067 | 8.5834775 | 58.743271 | 71.733847 | 42.073381 | MSTRG.20 | Coding     |
| MSTRG.21062 | 25.7317303244201 | 1.48937038505368  | 0.0009172 | 0.0200783 | 17.820257 | 14.126897 | 14.368158 | 17.310067 | 11.444636 | 66.086179 | 39.453616 | 25.244028 | MSTRG.21 | Non-coding |
| MSTRG.21160 | 3.56201679337863 | 5.48047789083542  | 3.5706589 | 0.0016220 | 0.3126360 | 0         | 0         | 0         | 0         | 9.7905451 | 7.1733847 | 11.219568 | MSTRG.21 | Non-coding |
| MSTRG.21223 | 2.94290576536784 | 5.98101474369184  | 0.0012126 | 0.0245280 | 0         | 0         | 0         | 0         | 0         | 17.933461 | 5.6097841 |           | MSTRG.21 | Non-coding |
| MSTRG.21224 | 65.9085711432373 | 2.70105297759449  | 0.0012987 | 0.0258491 | 0.9379082 | 5.8862072 | 14.368158 | 43.275168 | 45.778546 | 107.69599 | 222.37492 | 86.951654 | MSTRG.21 | Non-coding |
| MSTRG.21282 | 7.34781222549242 | -5.06900944379717 | 0.0003663 | 0.0099379 | 7.8159023 | 4.7089658 | 5.9867328 | 25.965100 | 14.305795 | 0         | 0         | 0         | MSTRG.21 | Non-coding |
| MSTRG.21307 | 19.5280675301977 | 4.5210809285296   | 4.1590529 | 7.0018878 | 2.8137248 | 1.1772414 | 1.1973465 | 2.8850112 | 2.8611591 | 7.3429088 | 53.800385 | 84.146762 | MSTRG.21 | Non-coding |
| MSTRG.21308 | 84.7782899731734 | 5.25067384401354  | 1.0286658 | 2.9440415 | 3.1263609 | 2.3544829 | 3.5920397 | 14.425056 | 8.5834775 | 85.667270 | 164.98785 | 395.48978 | MSTRG.21 | Non-coding |
| MSTRG.21335 | 6.93556451496778 | 3.19556900428965  | 0.0010843 | 0.0226939 | 1.2505443 | 0         | 2.3946931 | 0         | 5.7223183 | 9.7905451 | 25.106846 | 11.219568 | MSTRG.21 | Non-coding |
| MSTRG.21409 | 51.8001893266652 | 3.53191621784642  | 9.5588995 | 0.0005499 | 3.4389970 | 2.3544829 | 19.157545 | 2.8850112 | 25.750432 | 29.371635 | 208.02815 | 123.41525 | MSTRG.21 | Coding     |
| MSTRG.21419 | 79.0691681812834 | -2.23381461084137 | 0.0006725 | 0.0156898 | 112.23635 | 133.02828 | 165.23382 | 98.090380 | 51.500865 | 41.609816 | 0         | 30.853812 | MSTRG.21 | Coding     |
| MSTRG.21435 | 4.15467146853028 | -4.27524327660463 | 0.0026418 | 0.0424766 | 3.4389970 | 7.0634487 | 8.3814260 | 5.7700224 | 8.5834775 | 0         | 0         | 0         | MSTRG.21 | Non-coding |
| MSTRG.21478 | 41.1571571071407 | 1.67234662543458  | 0.0001041 | 0.0037913 | 19.070801 | 22.367587 | 19.157545 | 34.620134 | 20.028114 | 34.266908 | 104.01407 | 75.732085 | MSTRG.21 | Coding     |
| MSTRG.215   | 33.6306993801874 | 2.69037135926507  | 8.9330247 | 0.0005244 | 7.1906301 | 18.835863 | 16.762852 | 0         | 11.444636 | 48.952725 | 78.907232 | 86.951654 | MSTRG.21 | Coding     |
| MSTRG.21504 | 13.9263177170202 | 3.38523054337048  | 0.0005137 | 0.0129027 | 0.6252721 | 0         | 4.7893862 | 8.6550336 | 2.8611591 | 7.3429088 | 39.453616 | 47.683165 | MSTRG.21 | Non-coding |
| MSTRG.21717 | 40.2320927432718 | 1.81190428996973  | 5.2066776 | 0.0003311 | 28.137248 | 18.835863 | 22.749584 | 23.080089 | 8.5834775 | 70.981452 | 68.147155 | 81.341870 | MSTRG.21 | Coding     |
| MSTRG.21850 | 18.5789746772774 | 4.32916765755414  | 1.8340251 | 2.5234172 | 1.2505443 | 1.1772414 | 5.9867328 | 2.8850112 | 0         | 17.133454 | 75.320540 | 44.878273 | MSTRG.21 | Non-coding |
| MSTRG.21955 | 102.70277257709  | 1.71966196246957  | 0.0028390 | 0.0446449 | 26.886704 | 15.304138 | 86.208953 | 112.51543 | 37.195069 | 127.27708 | 236.72169 | 179.51309 | MSTRG.21 | Coding     |
| MSTRG.21970 | 29.5332287069948 | 1.67718965391177  | 0.0005523 | 0.0135989 | 15.006532 | 11.772414 | 22.749584 | 14.425056 | 17.166955 | 31.819271 | 89.667309 | 33.658704 | MSTRG.21 | Non-coding |
| MSTRG.22050 | 31.3493402483133 | 5.09584995155301  | 0.0017714 | 0.0319801 | 1.2505443 | 0         | 2.3946931 | 0         | 8.5834775 | 2.4476362 | 53.800385 | 182.31798 | MSTRG.22 | Non-coding |
| MSTRG.2206  | 20.0342953974659 | -5.56771148970585 | 8.2839951 | 0.0004913 | 31.576245 | 23.544829 | 25.144278 | 37.505145 | 40.056228 | 2.4476362 | 0         | 0         | MSTRG.22 | Coding     |
| MSTRG.22087 | 60.7939989212188 | 3.03118510732635  | 9.0026410 | 0.0033902 | 4.6895414 | 1.1772414 | 13.170812 | 51.930201 | 14.305795 | 132.17235 | 139.88100 | 129.02503 | MSTRG.22 | Non-coding |
| MSTRG.22123 | 60.7939989212188 | 3.03118510732635  | 9.0026410 | 0.0033902 | 4.6895414 | 1.1772414 | 13.170812 | 51.930201 | 14.305795 | 132.17235 | 139.88100 | 129.02503 | MSTRG.22 | Non-coding |
| MSTRG.22129 | 8.25966825377018 | 5.11473982284504  | 7.5418838 | 0.0029168 | 0         | 0         | 1.1973465 | 2.8850112 | 0         | 2.4476362 | 28.693539 | 30.853812 | MSTRG.22 | Coding     |
| MSTRG.22136 | 8.25966825377018 | 5.11473982284504  | 7.5418838 | 0.0029168 | 0         | 0         | 1.1973465 | 2.8850112 | 0         | 2.4476362 | 28.693539 | 30.853812 | MSTRG.22 | Non-coding |
| MSTRG.22167 | 9.16241251859315 | -3.45290260088783 | 0.0026169 | 0.0422545 | 12.818079 | 14.126897 | 15.565505 | 17.310067 | 8.5834775 | 4.8952725 | 0         | 0         | MSTRG.22 | Non-coding |
| MSTRG.22195 | 60.7939989212188 | 3.03118510732635  | 9.0026410 | 0.0033902 | 4.6895414 | 1.1772414 | 13.170812 | 51.930201 | 14.305795 | 132.17235 | 139.88100 | 129.02503 | MSTRG.22 | Non-coding |
| MSTRG.22232 | 10.2024724648161 | 2.24219653795183  | 0.0013671 | 0.0266506 | 1.5631804 | 3.5317243 | 5.9867328 | 2.8850112 | 8.5834775 | 17.133454 | 25.106846 | 16.829352 | MSTRG.22 | Non-coding |
| MSTRG.22271 | 65.8134965524433 | 1.30240215632632  | 0.0017599 | 0.0318299 | 29.075156 | 28.253794 | 34.723050 | 63.470246 | 60.084342 | 88.114906 | 147.05438 | 75.732085 | MSTRG.22 | Coding     |
| MSTRG.22274 | 31.3881112203797 | 1.70819197502708  | 7.0943056 | 0.0028102 | 15.631804 | 21.190346 | 23.946931 | 11.540044 | 11.444636 | 36.714544 | 71.733847 | 58.902733 | MSTRG.22 | Coding     |
| MSTRG.22277 | 225.113990689062 | 2.63984354872445  | 5.7998006 | 2.6558446 | 48.145958 | 80.052419 | 128.11608 | 51.930201 | 71.528979 | 320.64035 | 480.61678 | 619.88114 | MSTRG.22 | Non-coding |

|             |                  |                   |           |           |           |           |           |           |           |           |           |           |          |            |
|-------------|------------------|-------------------|-----------|-----------|-----------|-----------|-----------|-----------|-----------|-----------|-----------|-----------|----------|------------|
| MSTRG.22278 | 225.074911177356 | 2.64110717894669  | 6.1988175 | 2.7293870 | 47.833322 | 80.052419 | 128.11608 | 51.930201 | 71.528979 | 320.64035 | 480.61678 | 619.88114 | MSTRG.22 | Non-coding |
| MSTRG.2309  | 18.19521164271   | -3.14676347917017 | 0.0007032 | 0.0163294 | 34.702606 | 45.912416 | 34.723050 | 5.7700224 | 14.305795 | 7.3429088 | 0         | 2.8048920 | MSTRG.23 | Coding     |
| MSTRG.2392  | 110.262609185784 | 2.8210017206179   | 0.0001890 | 0.0061125 | 6.2527218 | 5.8862072 | 21.552238 | 86.550336 | 51.500865 | 100.35308 | 340.73577 | 269.26963 | MSTRG.23 | Non-coding |
| MSTRG.2425  | 9.23263378885254 | 2.92404592205294  | 0.0014591 | 0.0276553 | 1.2505443 | 0         | 2.3946931 | 2.8850112 | 8.5834775 | 17.133454 | 10.760077 | 30.853812 | MSTRG.24 | Non-coding |
| MSTRG.2628  | 4.07843727176386 | -4.2289015717033  | 0.0029797 | 0.0463350 | 4.6895414 | 5.8862072 | 4.7893862 | 11.540044 | 5.7223183 | 0         | 0         | 0         | MSTRG.26 | Coding     |
| MSTRG.2643  | 4.84826641610051 | -4.50673109671946 | 0.0021935 | 0.0371474 | 5.0021774 | 14.126897 | 2.3946931 | 11.540044 | 5.7223183 | 0         | 0         | 0         | MSTRG.26 | Non-coding |
| MSTRG.2669  | 32.4386908094111 | 1.50298105741642  | 0.0009495 | 0.0205643 | 19.383437 | 16.481380 | 13.170812 | 31.735123 | 17.166955 | 29.371635 | 78.907232 | 53.292949 | MSTRG.26 | Coding     |
| MSTRG.273   | 16.7240357306843 | 2.6989696527088   | 0.0025899 | 0.0418780 | 0.6252721 | 1.1772414 | 4.7893862 | 17.310067 | 5.7223183 | 14.685817 | 50.213693 | 39.268489 | MSTRG.27 | Non-coding |
| MSTRG.284   | 5.62776295446507 | 4.96336488898012  | 9.2597675 | 0.0034529 | 1.2505443 | 0         | 0         | 0         | 0         | 9.7905451 | 14.346769 | 19.634244 | MSTRG.28 | Non-coding |
| MSTRG.291   | 57.8559698470208 | 3.693881535102    | 0.0022419 | 0.0377061 | 9.3790828 | 4.7089658 | 32.328357 | 0         | 5.7223183 | 19.581090 | 211.61485 | 179.51309 | MSTRG.29 | Coding     |
| MSTRG.2913  | 521.520512886026 | 2.97470977181976  | 1.1539505 | 3.3872885 | 90.977103 | 188.35863 | 251.44278 | 60.585235 | 137.33564 | 633.93779 | 1205.1286 | 1604.3982 | MSTRG.29 | Non-coding |
| MSTRG.2978  | 8.33720147335151 | 2.43108954537791  | 0.0003651 | 0.0099281 | 2.1884526 | 3.5317243 | 2.3946931 | 2.8850112 | 5.7223183 | 19.581090 | 10.760077 | 19.634244 | MSTRG.29 | Non-coding |
| MSTRG.299   | 60.3911854963028 | 5.06241475387551  | 5.7879475 | 6.6260423 | 3.7516331 | 1.1772414 | 9.5787725 | 0         | 8.5834775 | 70.981452 | 150.64108 | 238.41582 | MSTRG.29 | Non-coding |
| MSTRG.2990  | 44.1517538737139 | 1.11815786991806  | 0.0008193 | 0.0184286 | 25.010887 | 36.494485 | 28.736317 | 31.735123 | 31.472751 | 78.324361 | 68.147155 | 53.292949 | MSTRG.29 | Coding     |
| MSTRG.3102  | 93.6717120626398 | -1.2715366199693  | 0.0002757 | 0.0080311 | 138.81042 | 122.43311 | 126.91873 | 75.010291 | 134.47448 | 70.981452 | 35.866923 | 44.878273 | MSTRG.31 | Coding     |
| MSTRG.3135  | 42.4370121971625 | 3.45578960602527  | 2.6843575 | 4.6561401 | 9.6917189 | 9.4179316 | 13.170812 | 2.8850112 | 8.5834775 | 29.371635 | 89.667309 | 176.70820 | MSTRG.31 | Non-coding |
| MSTRG.3189  | 41.3503694704385 | -2.60950206350865 | 4.2688219 | 3.9731279 | 55.649224 | 81.229660 | 64.656714 | 49.045190 | 48.639706 | 19.581090 | 3.5866923 | 8.4146762 | MSTRG.31 | Coding     |
| MSTRG.323   | 68.1569144166288 | -1.15417022098103 | 0.0014538 | 0.0276474 | 106.92154 | 87.115867 | 94.590379 | 77.895302 | 60.084342 | 56.295634 | 28.693539 | 33.658704 | MSTRG.32 | Coding     |
| MSTRG.3305  | 10.8739947732428 | 4.25368105979725  | 0.0013804 | 0.0268300 | 0         | 0         | 0         | 5.7700224 | 2.8611591 | 44.057453 | 28.693539 | 5.6097841 | MSTRG.33 | Non-coding |
| MSTRG.3545  | 7.71057263878205 | 4.09353097546458  | 0.0001228 | 0.0043424 | 1.5631804 | 0         | 1.1973465 | 0         | 2.8611591 | 2.4476362 | 14.346769 | 39.268489 | MSTRG.35 | Non-coding |
| MSTRG.3546  | 8.82105269456573 | 4.4408990470854   | 2.4370893 | 0.0011974 | 1.2505443 | 0         | 1.1973465 | 0         | 2.8611591 | 2.4476362 | 17.933461 | 44.878273 | MSTRG.35 | Non-coding |
| MSTRG.3548  | 6.94963182737549 | 4.05908275539624  | 0.0020733 | 0.0358459 | 0.3126360 | 0         | 2.3946931 | 0         | 2.8611591 | 0         | 10.760077 | 39.268489 | MSTRG.35 | Non-coding |
| MSTRG.3638  | 8.16644022706309 | -4.20331072145151 | 0.0018566 | 0.0331592 | 6.5653579 | 11.772414 | 7.1840794 | 20.195078 | 17.166955 | 2.4476362 | 0         | 0         | MSTRG.36 | Coding     |
| MSTRG.3728  | 21.4497819233326 | -2.31177164373316 | 0.0014231 | 0.0272442 | 36.891059 | 25.899312 | 19.157545 | 31.735123 | 37.195069 | 17.133454 | 3.5866923 | 0         | MSTRG.37 | Non-coding |
| MSTRG.379   | 3.48531369832859 | 4.78972865273283  | 0.0019830 | 0.0349565 | 0         | 0         | 0         | 0         | 2.8611591 | 12.238181 | 7.1733847 | 5.6097841 | MSTRG.37 | Non-coding |
| MSTRG.3829  | 20.7344169858204 | 1.6639551356451   | 0.0026331 | 0.0423973 | 12.192807 | 9.4179316 | 13.170812 | 17.310067 | 5.7223183 | 22.028726 | 21.520154 | 64.512517 | MSTRG.38 | Coding     |
| MSTRG.3847  | 3.71841919430155 | 3.754129311100925 | 0.0020789 | 0.0358459 | 1.2505443 | 0         | 1.1973465 | 0         | 0         | 7.3429088 | 14.346769 | 5.6097841 | MSTRG.38 | Non-coding |
| MSTRG.3869  | 21.1068858291414 | -1.7283561170861  | 0.0019257 | 0.0341483 | 33.139425 | 30.608277 | 28.736317 | 31.735123 | 17.166955 | 14.685817 | 7.1733847 | 5.6097841 | MSTRG.38 | Coding     |
| MSTRG.3903  | 62.2861753094424 | -2.02787950953326 | 1.8235691 | 2.5234172 | 93.478192 | 77.697936 | 80.222220 | 92.320358 | 91.557093 | 14.685817 | 28.693539 | 19.634244 | MSTRG.39 | Coding     |
| MSTRG.3935  | 7.20957287113533 | 3.66221844569365  | 2.5646296 | 0.0012493 | 1.5631804 | 1.1772414 | 1.1973465 | 0         | 2.8611591 | 4.8952725 | 17.933461 | 28.048920 | MSTRG.39 | Non-coding |
| MSTRG.4008  | 8.76607773498272 | 3.07479373793567  | 0.0005549 | 0.0136139 | 1.2505443 | 3.5317243 | 5.9867328 | 0         | 0         | 9.7905451 | 21.520154 | 28.048920 | MSTRG.40 | Coding     |
| MSTRG.401   | 115.965617235161 | -1.36078441468548 | 4.0684838 | 3.8460785 | 166.94767 | 153.04138 | 126.91873 | 144.25056 | 160.22491 | 63.638543 | 53.800385 | 58.902733 | MSTRG.40 | Non-coding |
| MSTRG.4012  | 28.3783255904257 | 2.45719643598567  | 0.0008152 | 0.0183719 | 9.6917189 | 8.2406902 | 22.749584 | 0         | 11.444636 | 17.133454 | 93.254002 | 64.512517 | MSTRG.40 | Coding     |
| MSTRG.4028  | 16.9046440162229 | 2.38385378096369  | 0.0005370 | 0.0133645 | 2.5010887 | 2.3544829 | 4.7893862 | 11.540044 | 14.305795 | 34.266908 | 43.040308 | 22.439136 | MSTRG.40 | Coding     |
| MSTRG.4041  | 47.8134686243338 | 1.39471803193154  | 0.0001692 | 0.0055370 | 25.948795 | 34.140002 | 37.117743 | 28.850112 | 22.889273 | 46.505089 | 86.080617 | 100.97611 | MSTRG.40 | Coding     |
| MSTRG.4046  | 4.0666986357694  | -4.31059370264819 | 0.0029763 | 0.0463350 | 8.4411745 | 4.7089658 | 10.776119 | 2.8850112 | 5.7223183 | 0         | 0         | 0         | MSTRG.40 | Coding     |
| MSTRG.4081  | 9.92970510059846 | -4.54718505830087 | 0.0016205 | 0.0297794 | 16.569712 | 24.722070 | 1.1973465 | 20.195078 | 14.305795 | 2.4476362 | 0         | 0         | MSTRG.40 | Non-coding |
| MSTRG.4220  | 10.8633905400411 | 2.23745990509862  | 0.0012016 | 0.0243483 | 2.8137248 | 5.8862072 | 1.1973465 | 5.7700224 | 8.5834775 | 17.133454 | 28.693539 | 16.829352 | MSTRG.42 | Non-coding |
| MSTRG.4411  | 16.1668426018707 | -2.11115611177809 | 0.0011260 | 0.0233105 | 20.008709 | 30.608277 | 20.354891 | 25.965100 | 17.166955 | 2.4476362 | 7.1733847 | 5.6097841 | MSTRG.44 | Coding     |
| MSTRG.4517  | 17.8476357199001 | 1.97265648565941  | 0.0003589 | 0.0098296 | 7.1906301 | 9.4179316 | 7.1840794 | 11.540044 | 8.5834775 | 22.028726 | 17.933461 | 58.902733 | MSTRG.45 | Non-coding |

|            |                  |                   |           |           |           |           |           |           |           |           |           |           |          |            |
|------------|------------------|-------------------|-----------|-----------|-----------|-----------|-----------|-----------|-----------|-----------|-----------|-----------|----------|------------|
| MSTRG.4519 | 24.6836921032446 | 1.87589383003297  | 0.0002341 | 0.0071282 | 9.3790828 | 8.2406902 | 9.5787725 | 11.540044 | 25.750432 | 31.819271 | 39.453616 | 61.707625 | MSTRG.45 | Coding     |
| MSTRG.4571 | 69.9455969103061 | -1.41650705941699 | 3.9405477 | 0.0017218 | 112.86162 | 91.824833 | 64.656714 | 98.090380 | 88.695934 | 36.714544 | 35.866923 | 30.853812 | MSTRG.45 | Coding     |
| MSTRG.458  | 78.3637955931495 | 2.07399286132528  | 3.4276317 | 4.2193040 | 33.764698 | 31.785519 | 44.301823 | 34.620134 | 34.333910 | 75.876725 | 150.64108 | 221.58647 | MSTRG.45 | Non-coding |
| MSTRG.459  | 709.363961621737 | 3.14198413762807  | 0.0008315 | 0.0186282 | 27.511976 | 35.317243 | 222.70646 | 285.61610 | 331.89446 | 526.24180 | 2453.2975 | 1792.3260 | MSTRG.45 | Non-coding |
| MSTRG.4639 | 5.01032894287771 | 6.79160843975686  | 1.9886961 | 1.9970696 | 0         | 0         | 0         | 0         | 0         | 7.3429088 | 21.520154 | 11.219568 | MSTRG.46 | Non-coding |
| MSTRG.4653 | 437.540211636983 | -1.24158535810497 | 6.1926444 | 9.9849850 | 545.54998 | 596.86141 | 566.34492 | 565.46219 | 520.73097 | 181.12508 | 269.00192 | 255.24517 | MSTRG.46 | Coding     |
| MSTRG.4821 | 138.397298474255 | 3.83196900710035  | 2.9117567 | 3.7453697 | 7.5032662 | 9.4179316 | 64.656714 | 11.540044 | 22.889273 | 122.38181 | 279.76200 | 589.02733 | MSTRG.48 | Non-coding |
| MSTRG.4855 | 54.9206368892585 | 3.43467962104235  | 1.5055632 | 2.1544609 | 13.443352 | 12.949656 | 19.157545 | 5.7700224 | 5.7223183 | 26.923999 | 150.64108 | 204.75712 | MSTRG.48 | Coding     |
| MSTRG.490  | 38.350971624148  | -3.05803867244714 | 3.0029130 | 3.8197053 | 77.221115 | 50.621382 | 58.669982 | 54.815212 | 45.778546 | 4.8952725 | 3.5866923 | 11.219568 | MSTRG.49 | Non-coding |
| MSTRG.4903 | 52.4592653468278 | 3.0807519595732   | 1.0026635 | 0.0005654 | 10.942263 | 18.835863 | 21.552238 | 11.540044 | 5.7223183 | 12.238181 | 100.42738 | 238.41582 | MSTRG.49 | Non-coding |
| MSTRG.4919 | 10.4893879139185 | -3.14492748789624 | 0.0014573 | 0.0276553 | 18.132893 | 14.126897 | 11.973465 | 11.540044 | 22.889273 | 2.4476362 | 0         | 2.8048920 | MSTRG.49 | Coding     |
| MSTRG.4947 | 73.0702341839332 | -1.37756961269605 | 3.7045733 | 0.0016631 | 111.61108 | 103.59724 | 74.235487 | 83.665324 | 103.00173 | 26.923999 | 39.453616 | 42.073381 | MSTRG.49 | Non-coding |
| MSTRG.4988 | 18.5465130591257 | 4.82125893108683  | 5.1543793 | 1.6859238 | 0.9379082 | 1.1772414 | 3.5920397 | 2.8850112 | 0         | 19.581090 | 75.320540 | 44.878273 | MSTRG.49 | Non-coding |
| MSTRG.5021 | 4.18824556448138 | 3.75406084747426  | 0.0017566 | 0.0318193 | 0.3126360 | 0         | 1.1973465 | 0         | 2.8611591 | 17.133454 | 3.5866923 | 8.4146762 | MSTRG.50 | Non-coding |
| MSTRG.5224 | 76.7005310844722 | 2.16956556936645  | 1.5120216 | 3.0910042 | 37.828967 | 36.494485 | 33.525704 | 23.080089 | 34.333910 | 88.114906 | 147.05438 | 213.17179 | MSTRG.52 | Coding     |
| MSTRG.525  | 191.822300538047 | 1.43680209112049  | 1.2270542 | 0.0006657 | 108.48472 | 124.78759 | 106.56384 | 109.63042 | 137.33564 | 166.43926 | 444.74985 | 336.58704 | MSTRG.52 | Non-coding |
| MSTRG.5378 | 45.1771841188832 | 2.5293595609146   | 4.2749368 | 0.0002828 | 23.135070 | 9.4179316 | 19.157545 | 8.6550336 | 20.028114 | 26.923999 | 136.29431 | 117.80546 | MSTRG.53 | Coding     |
| MSTRG.5455 | 27.7498089390786 | -2.00364013176087 | 5.4581464 | 0.0022534 | 34.389970 | 47.089658 | 31.131010 | 37.505145 | 42.917387 | 9.7905451 | 10.760077 | 8.4146762 | MSTRG.54 | Non-coding |
| MSTRG.5731 | 46.4416270962631 | 1.77420782893041  | 1.8628748 | 0.0009693 | 18.758165 | 14.126897 | 31.131010 | 28.850112 | 31.472751 | 51.400362 | 100.42738 | 95.366330 | MSTRG.57 | Coding     |
| MSTRG.5802 | 259.563988032839 | 1.44581221916541  | 0.0004337 | 0.0112079 | 84.724381 | 141.26897 | 183.19402 | 230.80089 | 151.64143 | 200.70617 | 534.41716 | 549.75884 | MSTRG.58 | Coding     |
| MSTRG.5955 | 75.6004006400657 | 2.34640584333754  | 1.1717675 | 0.0006480 | 41.267964 | 42.380692 | 23.946931 | 23.080089 | 17.166955 | 39.162180 | 243.89508 | 173.90330 | MSTRG.59 | Coding     |
| MSTRG.6014 | 47.0730798469112 | 1.90997255139     | 2.6175387 | 4.6100898 | 20.946618 | 25.899312 | 25.144278 | 23.080089 | 20.028114 | 102.80072 | 71.733847 | 86.951654 | MSTRG.60 | Coding     |
| MSTRG.607  | 45.0625580485725 | 1.862831444797357 | 5.8918140 | 0.0024003 | 21.259254 | 17.658621 | 16.762852 | 23.080089 | 37.195069 | 34.266908 | 89.667309 | 120.61035 | MSTRG.60 | Coding     |
| MSTRG.6089 | 22.3968967224005 | 2.56303785267097  | 7.1091078 | 0.0004375 | 11.880171 | 10.595173 | 8.3814260 | 5.7700224 | 0         | 53.847998 | 46.627001 | 42.073381 | MSTRG.60 | Coding     |
| MSTRG.6105 | 157.195676248088 | -1.58251041097002 | 0.0021403 | 0.0366814 | 160.38231 | 472.07382 | 186.78606 | 150.02058 | 77.251297 | 83.219633 | 71.733847 | 56.097841 | MSTRG.61 | Coding     |
| MSTRG.6106 | 222.1734445574   | -2.00788270942943 | 9.6814759 | 0.0005541 | 215.09363 | 534.46762 | 228.69319 | 403.90156 | 163.08607 | 112.59126 | 46.627001 | 72.927193 | MSTRG.61 | Non-coding |
| MSTRG.6130 | 24.3335574385032 | 5.60285229060181  | 8.0700858 | 7.1066417 | 1.5631804 | 2.3544829 | 1.1973465 | 0         | 0         | 24.476362 | 75.320540 | 89.756546 | MSTRG.61 | Coding     |
| MSTRG.6139 | 8.18713032535147 | 2.43766725561093  | 0.0025029 | 0.0407014 | 2.8137248 | 2.3544829 | 2.3946931 | 8.6550336 | 0         | 7.3429088 | 25.106846 | 16.829352 | MSTRG.61 | Non-coding |
| MSTRG.6155 | 94.6811099242645 | -1.36757533134523 | 2.3464414 | 0.0011628 | 104.42045 | 153.04138 | 89.800992 | 144.25056 | 123.02984 | 51.400362 | 46.627001 | 44.878273 | MSTRG.61 | Coding     |
| MSTRG.6172 | 103.278004344142 | -1.53317477503605 | 2.4064670 | 0.0001722 | 136.62197 | 140.09173 | 119.73465 | 152.90559 | 134.47448 | 61.190907 | 25.106846 | 56.097841 | MSTRG.61 | Non-coding |
| MSTRG.6352 | 87.2454564321897 | -1.09526968987099 | 0.0007534 | 0.0171919 | 126.61761 | 121.25587 | 82.616913 | 103.86040 | 108.72404 | 68.533816 | 35.866923 | 50.488057 | MSTRG.63 | Coding     |
| MSTRG.6517 | 15.8304408102021 | 2.4481630390568   | 0.0012235 | 0.0247046 | 2.1884526 | 3.5317243 | 5.9867328 | 8.6550336 | 11.444636 | 4.8952725 | 39.453616 | 50.488057 | MSTRG.65 | Coding     |
| MSTRG.6656 | 1533.38549604816 | 5.20213517093423  | 4.3255319 | 6.1898361 | 32.826789 | 64.748280 | 272.99501 | 43.275168 | 117.30752 | 1329.0665 | 5369.2785 | 5037.5861 | MSTRG.66 | Non-coding |
| MSTRG.6763 | 67.7728860592772 | 1.51536872238865  | 2.7510623 | 0.0001944 | 40.642692 | 35.317243 | 44.301823 | 43.275168 | 37.195069 | 70.981452 | 147.05438 | 123.41525 | MSTRG.67 | Coding     |
| MSTRG.6895 | 21.182368658973  | 2.6048074923239   | 0.0001375 | 0.0047288 | 2.5010887 | 2.3544829 | 8.3814260 | 17.310067 | 8.5834775 | 24.476362 | 60.973770 | 44.878273 | MSTRG.68 | Coding     |
| MSTRG.6941 | 6.22931734033726 | -4.86134120001172 | 0.0003830 | 0.0101752 | 10.942263 | 5.8862072 | 7.1840794 | 8.6550336 | 17.166955 | 0         | 0         | 0         | MSTRG.69 | Non-coding |
| MSTRG.6946 | 76.5239492974779 | 1.97567906006464  | 3.7646625 | 0.0002550 | 39.392147 | 21.190346 | 47.893862 | 37.505145 | 37.195069 | 63.638543 | 157.81446 | 207.56201 | MSTRG.69 | Non-coding |
| MSTRG.7070 | 96.6375068957955 | -1.03822281610822 | 0.0006850 | 0.0159405 | 93.790828 | 114.19242 | 124.52404 | 138.48053 | 125.89100 | 78.324361 | 50.213693 | 47.683165 | MSTRG.70 | Coding     |
| MSTRG.7268 | 34.6009138425086 | 1.97449603945995  | 0.0002170 | 0.0067515 | 9.0664467 | 11.772414 | 13.170812 | 25.965100 | 25.750432 | 26.923999 | 96.840694 | 67.317409 | MSTRG.72 | Coding     |
| MSTRG.7331 | 56.7501102395245 | 2.58138533869709  | 1.0768831 | 4.2510892 | 18.132893 | 14.126897 | 15.565505 | 25.965100 | 28.611591 | 78.324361 | 147.05438 | 126.22014 | MSTRG.73 | Coding     |

|            |                  |                   |           |           |           |           |           |           |           |           |           |            |          |            |
|------------|------------------|-------------------|-----------|-----------|-----------|-----------|-----------|-----------|-----------|-----------|-----------|------------|----------|------------|
| MSTRG.7406 | 6.54880093908308 | 3.01855788847493  | 0.0022374 | 0.0377061 | 2.5010887 | 1.1772414 | 0         | 0         | 5.7223183 | 9.7905451 | 10.760077 | 22.439136  | MSTRG.74 | Coding     |
| MSTRG.7616 | 8.15660915290802 | -5.24102383940123 | 0.0001542 | 0.0052251 | 6.8779940 | 7.0634487 | 16.762852 | 25.965100 | 8.5834775 | 0         | 0         | 0          | MSTRG.76 | Non-coding |
| MSTRG.7622 | 4.07628518036563 | 5.21813054176742  | 7.2041829 | 0.0028439 | 0         | 0         | 1.1973465 | 0         | 0         | 12.238181 | 10.760077 | 8.4146762  | MSTRG.76 | Coding     |
| MSTRG.7756 | 5.89674622193009 | 4.27731334142231  | 0.0009121 | 0.0200036 | 0         | 1.1772414 | 2.3946931 | 0         | 0         | 2.4476362 | 21.520154 | 19.6342444 | MSTRG.77 | Non-coding |
| MSTRG.7830 | 380.394469058314 | 2.66208580324921  | 1.6728192 | 1.7098602 | 50.959683 | 63.571038 | 82.616913 | 216.37584 | 226.03157 | 543.37525 | 993.51379 | 866.71165  | MSTRG.78 | Coding     |
| MSTRG.7874 | 5.78980579450702 | 3.66874625426359  | 0.0012633 | 0.0254169 | 0.3126360 | 2.3544829 | 2.3946931 | 0         | 0         | 2.4476362 | 10.760077 | 28.048920  | MSTRG.78 | Non-coding |
| MSTRG.8175 | 13.0319882998191 | -2.69483275983031 | 0.0015100 | 0.0284317 | 21.884526 | 21.190346 | 17.960198 | 5.7700224 | 28.611591 | 2.4476362 | 3.5866923 | 2.8048920  | MSTRG.81 | Coding     |
| MSTRG.82   | 67.7911595856358 | -1.25054918237409 | 0.0002257 | 0.0069299 | 89.413922 | 98.888282 | 80.222220 | 75.010291 | 88.695934 | 46.505089 | 21.520154 | 42.073381  | MSTRG.82 | Coding     |
| MSTRG.8208 | 620.334550244266 | 1.30976054405714  | 0.0013028 | 0.0258491 | 227.28644 | 207.19449 | 362.79601 | 689.51767 | 512.14749 | 1069.6170 | 1097.5278 | 796.58934  | MSTRG.82 | Coding     |
| MSTRG.8221 | 116.235672696283 | 2.55789899179652  | 9.4521618 | 1.4427779 | 41.267964 | 35.317243 | 27.538971 | 51.930201 | 51.500865 | 83.219633 | 294.10877 | 345.00172  | MSTRG.82 | Non-coding |
| MSTRG.8311 | 102.711959574743 | 2.33361827649059  | 0.0007273 | 0.0167543 | 8.7538106 | 5.8862072 | 43.104476 | 83.665324 | 65.806661 | 173.78217 | 233.13500 | 207.56201  | MSTRG.83 | Non-coding |
| MSTRG.8563 | 25.0803498479601 | 2.29575436251187  | 4.5988117 | 0.0019718 | 8.7538106 | 9.4179316 | 15.565505 | 5.7700224 | 11.444636 | 14.685817 | 78.907232 | 56.097841  | MSTRG.85 | Coding     |
| MSTRG.8571 | 45.4466492258267 | -1.40361549215343 | 0.0002044 | 0.0064667 | 56.899769 | 56.507589 | 47.893862 | 60.585235 | 74.390138 | 26.923999 | 17.933461 | 22.439136  | MSTRG.85 | Coding     |
| MSTRG.858  | 14.3136684879485 | -3.11501111490421 | 0.0002930 | 0.0083930 | 16.569712 | 16.481380 | 19.157545 | 28.850112 | 25.750432 | 4.8952725 | 0         | 2.8048920  | MSTRG.85 | Coding     |
| MSTRG.8606 | 18.5878230723189 | 1.58500450822285  | 0.0013370 | 0.0263743 | 10.942263 | 8.2406902 | 8.3814260 | 11.540044 | 14.305795 | 46.505089 | 17.933461 | 30.853812  | MSTRG.86 | Coding     |
| MSTRG.8610 | 194.024391069304 | 1.17451983190419  | 0.0018037 | 0.0324671 | 128.18079 | 191.89035 | 162.83913 | 83.665324 | 91.557093 | 176.22981 | 333.56239 | 384.27021  | MSTRG.86 | Non-coding |
| MSTRG.8717 | 22.8868797087882 | 1.41385831600733  | 0.0024384 | 0.0398798 | 18.445529 | 14.126897 | 16.762852 | 11.540044 | 8.5834775 | 24.476362 | 35.866923 | 53.292949  | MSTRG.87 | Coding     |
| MSTRG.8767 | 115.32590395901  | -1.07014243258881 | 0.0010093 | 0.0214376 | 122.55334 | 191.89035 | 161.64178 | 147.13557 | 94.418253 | 58.743271 | 78.907232 | 67.317409  | MSTRG.87 | Non-coding |
| MSTRG.8843 | 88.173892696859  | 1.56446938007225  | 2.0786780 | 0.0001506 | 53.773408 | 49.444141 | 71.840794 | 43.275168 | 34.333910 | 112.59126 | 157.81446 | 182.31798  | MSTRG.88 | Non-coding |
| MSTRG.8880 | 13.3219798125404 | -3.36398155902661 | 0.0010553 | 0.0222489 | 21.884526 | 23.544829 | 25.144278 | 5.7700224 | 22.889273 | 7.3429088 | 0         | 0          | MSTRG.88 | Non-coding |
| MSTRG.8897 | 10.2095796092822 | 2.66006130136647  | 0.0002765 | 0.0080365 | 2.1884526 | 1.1772414 | 3.5920397 | 2.8850112 | 8.5834775 | 26.923999 | 25.106846 | 11.219568  | MSTRG.88 | Coding     |
| MSTRG.8918 | 46.171335716657  | 1.04167726960896  | 0.0031493 | 0.0484596 | 25.010887 | 34.140002 | 25.144278 | 46.160179 | 37.195069 | 73.429088 | 60.973770 | 67.317409  | MSTRG.89 | Non-coding |
| MSTRG.8942 | 559.634801472806 | -1.16090409026945 | 3.0595522 | 3.8489839 | 814.10438 | 707.52211 | 565.14758 | 701.05772 | 741.04022 | 330.43089 | 312.04223 | 305.73323  | MSTRG.89 | Coding     |
| MSTRG.8994 | 20.305240486521  | -2.20290544488334 | 0.0015411 | 0.0289233 | 19.696073 | 31.785519 | 37.117743 | 28.850112 | 25.750432 | 4.8952725 | 14.346769 | 0          | MSTRG.89 | Coding     |
| MSTRG.9004 | 76.228945337339  | -1.29886042963148 | 0.0008635 | 0.0191993 | 131.93243 | 115.36966 | 101.77445 | 66.355257 | 74.390138 | 41.609816 | 25.106846 | 53.292949  | MSTRG.90 | Coding     |
| MSTRG.9033 | 93.6029053377654 | -1.28556799876175 | 0.0004939 | 0.0124564 | 172.88775 | 123.61035 | 106.56384 | 83.665324 | 114.44636 | 31.819271 | 68.147155 | 47.683165  | MSTRG.90 | Non-coding |
| MSTRG.9137 | 70.610960389585  | -1.55459483722011 | 0.0001475 | 0.0050419 | 73.469482 | 111.83793 | 69.446101 | 124.05548 | 88.695934 | 51.400362 | 17.933461 | 28.048920  | MSTRG.91 | Coding     |
| MSTRG.9161 | 34.2631883929298 | 1.40802969811832  | 0.0029870 | 0.0463350 | 22.822434 | 9.4179316 | 17.960198 | 25.965100 | 31.472751 | 34.266908 | 78.907232 | 53.292949  | MSTRG.91 | Coding     |
| MSTRG.9176 | 31.6593974692217 | 3.1602672339358   | 0.0001694 | 0.0055370 | 8.4411745 | 18.835863 | 10.776119 | 0         | 0         | 26.923999 | 78.907232 | 109.39079  | MSTRG.91 | Non-coding |
| MSTRG.9194 | 135.723109356508 | -1.25692537173792 | 0.0016173 | 0.0297675 | 182.26684 | 202.48553 | 123.32669 | 196.18076 | 165.94723 | 56.295634 | 35.866923 | 123.41525  | MSTRG.91 | Non-coding |
| MSTRG.9225 | 6.10772499920018 | 4.40699433741513  | 1.5130979 | 0.0001163 | 0.6252721 | 1.1772414 | 1.1973465 | 0         | 0         | 14.685817 | 14.346769 | 16.829352  | MSTRG.92 | Coding     |
| MSTRG.9265 | 80.0932806680954 | 1.4874958820271   | 0.0002286 | 0.0069990 | 42.831144 | 60.039314 | 63.459368 | 23.080089 | 48.639706 | 80.771997 | 190.09469 | 131.82992  | MSTRG.92 | Coding     |
| MSTRG.9371 | 25.7864173042771 | 2.91888875289219  | 0.0004765 | 0.0121762 | 1.2505443 | 1.1772414 | 5.9867328 | 8.6550336 | 22.889273 | 24.476362 | 71.733847 | 70.122301  | MSTRG.93 | Coding     |
| MSTRG.9419 | 26.1902785649611 | 1.80058058327416  | 0.0001479 | 0.0050419 | 14.068624 | 16.481380 | 16.762852 | 8.6550336 | 11.444636 | 26.923999 | 39.453616 | 75.732085  | MSTRG.94 | Non-coding |
| MSTRG.9433 | 48.5254375935472 | 1.76284369151551  | 0.0019899 | 0.0349939 | 29.700428 | 27.076553 | 33.525704 | 11.540044 | 25.750432 | 17.133454 | 100.42738 | 143.04949  | MSTRG.94 | Coding     |
| MSTRG.9460 | 191.115431810751 | 1.55690531517191  | 0.0002569 | 0.0076518 | 86.287561 | 54.153107 | 94.590379 | 164.44563 | 157.36375 | 183.57272 | 451.92324 | 336.58704  | MSTRG.94 | Coding     |
| MSTRG.9541 | 32.2373803629311 | 1.79660046726176  | 0.0005854 | 0.0141095 | 24.072979 | 17.658621 | 14.368158 | 5.7700224 | 20.028114 | 80.771997 | 25.106846 | 70.122301  | MSTRG.95 | Coding     |
| MSTRG.9631 | 185.359771031994 | 2.14552197928336  | 1.0245178 | 1.5432474 | 109.73526 | 84.761384 | 101.77445 | 57.700224 | 48.639706 | 234.97308 | 326.38900 | 518.90503  | MSTRG.96 | Non-coding |
| MSTRG.9747 | 153.156164809305 | 1.463347808673    | 6.0136532 | 0.0024412 | 60.964038 | 82.406902 | 96.985072 | 129.82550 | 94.418253 | 171.33454 | 387.36277 | 201.95222  | MSTRG.97 | Non-coding |
| MSTRG.9772 | 5.90703235823679 | -4.79979944360994 | 0.0006698 | 0.0156898 | 8.1285384 | 11.772414 | 7.1840794 | 17.310067 | 2.8611591 | 0         | 0         | 0          | MSTRG.97 | Non-coding |

MSTRG.9795 42.2302585740143 -3.55121469267742 2.4026757 4.3660051 54.398680 80.052419 70.643447 54.815212 60.084342 12.238181 0 5.6097841 MSTRG.97: Coding  
MSTRG.9933 86.6919166953993 1.87770163774312 4.1667218 0.0002773 55.961860 51.798624 51.485902 37.505145 17.166955 100.35308 182.92131 196.34244 MSTRG.99: Non-coding

**Supplementary Table 3. Proportion and count per million(CPM) vaules of differentialy alternative splicing genes in Riccia fluitans thallus after high-dose micro-/nanoplastic treatment**

| Gene_ID     | transcript variant  | sample | group | CPM      | proportion |
|-------------|---------------------|--------|-------|----------|------------|
| MSTRG.15348 | MSTRG.15348.2       | CTR1   | CTR   | 33.2327  | 0.1186     |
|             | MSTRG.15348.2       | CTR2   | CTR   | 23.9993  | 0.0816     |
|             | MSTRG.15348.2       | CTR3   | CTR   | 28.0608  | 0.104      |
|             | MSTRG.15348.2       | CTR4   | CTR   | 46.0959  | 0.206      |
|             | MSTRG.15348.2       | CTR5   | CTR   | 27.5412  | 0.1636     |
|             | MSTRG.15348.2       | HIGH_1 | HIGH  | 143.372  | 0.4763     |
|             | MSTRG.15348.2       | HIGH_2 | HIGH  | 161.174  | 0.5719     |
|             | MSTRG.15348.2       | HIGH_3 | HIGH  | 241.2041 | 0.6452     |
| MSTRG.15348 | MSTRG.15348.1       | CTR1   | CTR   | 229.3186 | 0.8185     |
|             | MSTRG.15348.1       | CTR2   | CTR   | 199.2015 | 0.6777     |
|             | MSTRG.15348.1       | CTR3   | CTR   | 182.3008 | 0.6753     |
|             | MSTRG.15348.1       | CTR4   | CTR   | 123.3415 | 0.5512     |
|             | MSTRG.15348.1       | CTR5   | CTR   | 102.5146 | 0.6091     |
|             | MSTRG.15348.1       | HIGH_1 | HIGH  | 107.4977 | 0.3571     |
|             | MSTRG.15348.1       | HIGH_2 | HIGH  | 116.7851 | 0.4144     |
|             | MSTRG.15348.1       | HIGH_3 | HIGH  | 93.0478  | 0.2489     |
| MSTRG.15348 | evm.model.chr6.1922 | CTR1   | CTR   | 17.6032  | 0.0628     |
|             | evm.model.chr6.1922 | CTR2   | CTR   | 41.9813  | 0.1428     |
|             | evm.model.chr6.1922 | CTR3   | CTR   | 59.5742  | 0.2207     |
|             | evm.model.chr6.1922 | CTR4   | CTR   | 53.7786  | 0.2403     |
|             | evm.model.chr6.1922 | CTR5   | CTR   | 38.2517  | 0.2273     |
|             | evm.model.chr6.1922 | HIGH_1 | HIGH  | 50.1739  | 0.1667     |
|             | evm.model.chr6.1922 | HIGH_2 | HIGH  | 0.0      | 0.0        |
|             | evm.model.chr6.1922 | HIGH_3 | HIGH  | 35.4468  | 0.0948     |
| MSTRG.15348 | MSTRG.15348.6       | CTR1   | CTR   | 0.0      | 0.0        |
|             | MSTRG.15348.6       | CTR2   | CTR   | 16.7226  | 0.0569     |
|             | MSTRG.15348.6       | CTR3   | CTR   | 0.0      | 0.0        |
|             | MSTRG.15348.6       | CTR4   | CTR   | 0.2794   | 0.0012     |
|             | MSTRG.15348.6       | CTR5   | CTR   | 0.0      | 0.0        |

|             |                     |        |      |          |        |
|-------------|---------------------|--------|------|----------|--------|
|             | MSTRG.15348.6       | HIGH_1 | HIGH | 0.0      | 0.0    |
|             | MSTRG.15348.6       | HIGH_2 | HIGH | mar.52   | 0.0138 |
|             | MSTRG.15348.6       | HIGH_3 | HIGH | 4.1539   | 0.0111 |
| MSTRG.15348 | MSTRG.15348.7       | CTR1   | CTR  | 0.0      | 0.0    |
|             | MSTRG.15348.7       | CTR2   | CTR  | 12.0347  | 0.0409 |
|             | MSTRG.15348.7       | CTR3   | CTR  | 0.0      | 0.0    |
|             | MSTRG.15348.7       | CTR4   | CTR  | 0.2794   | 0.0012 |
|             | MSTRG.15348.7       | CTR5   | CTR  | 0.0      | 0.0    |
|             | MSTRG.15348.7       | HIGH_1 | HIGH | 0.0      | 0.0    |
|             | MSTRG.15348.7       | HIGH_2 | HIGH | 0.0      | 0.0    |
|             | MSTRG.15348.7       | HIGH_3 | HIGH | 0.0      | 0.0    |
| MSTRG.15348 | MSTRG.15348.9       | CTR1   | CTR  | 0.0      | 0.0    |
|             | MSTRG.15348.9       | CTR2   | CTR  | 0.0      | 0.0    |
|             | MSTRG.15348.9       | CTR3   | CTR  | 0.0      | 0.0    |
|             | MSTRG.15348.9       | CTR4   | CTR  | 0.0      | 0.0    |
|             | MSTRG.15348.9       | CTR5   | CTR  | 0.0      | 0.0    |
|             | MSTRG.15348.9       | HIGH_1 | HIGH | 0.0      | 0.0    |
|             | MSTRG.15348.9       | HIGH_2 | HIGH | 0.0      | 0.0    |
|             | MSTRG.15348.9       | HIGH_3 | HIGH | 0.0      | 0.0    |
| MSTRG.1789  | evm.model.chr1.2189 | CTR1   | CTR  | 155.9774 | 0.5904 |
|             | evm.model.chr1.2189 | CTR2   | CTR  | 657.7078 | 0.7287 |
|             | evm.model.chr1.2189 | CTR3   | CTR  | 941.6364 | 0.7177 |
|             | evm.model.chr1.2189 | CTR4   | CTR  | 377.1484 | 0.4655 |
|             | evm.model.chr1.2189 | CTR5   | CTR  | 244.811  | 0.4211 |
|             | evm.model.chr1.2189 | HIGH_1 | HIGH | 250.8697 | 0.3846 |
|             | evm.model.chr1.2189 | HIGH_2 | HIGH | 70.4586  | 0.1176 |
|             | evm.model.chr1.2189 | HIGH_3 | HIGH | 110.7711 | 0.2286 |
| MSTRG.1789  | MSTRG.1789.1        | CTR1   | CTR  | 54.1146  | 0.2048 |
|             | MSTRG.1789.1        | CTR2   | CTR  | 115.5886 | 0.1281 |
|             | MSTRG.1789.1        | CTR3   | CTR  | 197.932  | 0.1509 |
|             | MSTRG.1789.1        | CTR4   | CTR  | 209.5269 | 0.2586 |
|             | MSTRG.1789.1        | CTR5   | CTR  | 61.2028  | 0.1053 |
|             | MSTRG.1789.1        | HIGH_1 | HIGH | 225.7827 | 0.3462 |

|            |              |        |      |          |        |
|------------|--------------|--------|------|----------|--------|
|            | MSTRG.1789.1 | HIGH_2 | HIGH | 264.2196 | 0.4412 |
|            | MSTRG.1789.1 | HIGH_3 | HIGH | 138.4639 | 0.2857 |
| MSTRG.1789 | MSTRG.1789.2 | CTR1   | CTR  | 25.4657  | 0.0964 |
|            | MSTRG.1789.2 | CTR2   | CTR  | 57.7943  | 0.064  |
|            | MSTRG.1789.2 | CTR3   | CTR  | 70.2461  | 0.0535 |
|            | MSTRG.1789.2 | CTR4   | CTR  | 111.7477 | 0.1379 |
|            | MSTRG.1789.2 | CTR5   | CTR  | 198.909  | 0.3421 |
|            | MSTRG.1789.2 | HIGH_1 | HIGH | 100.3479 | 0.1538 |
|            | MSTRG.1789.2 | HIGH_2 | HIGH | 35.2293  | 0.0588 |
|            | MSTRG.1789.2 | HIGH_3 | HIGH | 96.9247  | 0.2    |
| MSTRG.1789 | MSTRG.1789.3 | CTR1   | CTR  | gru.28   | 0.0482 |
|            | MSTRG.1789.3 | CTR2   | CTR  | 43.3108  | 0.048  |
|            | MSTRG.1789.3 | CTR3   | CTR  | 76.6492  | 0.0584 |
|            | MSTRG.1789.3 | CTR4   | CTR  | 27.9369  | 0.0345 |
|            | MSTRG.1789.3 | CTR5   | CTR  | 45.9021  | 0.0789 |
|            | MSTRG.1789.3 | HIGH_1 | HIGH | 50.1739  | 0.0769 |
|            | MSTRG.1789.3 | HIGH_2 | HIGH | 176.1464 | 0.2941 |
|            | MSTRG.1789.3 | HIGH_3 | HIGH | 83.0784  | 0.1714 |
| MSTRG.1789 | MSTRG.1789.4 | CTR1   | CTR  | 15.9161  | 0.0602 |
|            | MSTRG.1789.4 | CTR2   | CTR  | lip.68   | 0.008  |
|            | MSTRG.1789.4 | CTR3   | CTR  | 25.5497  | 0.0195 |
|            | MSTRG.1789.4 | CTR4   | CTR  | 69.8423  | 0.0862 |
|            | MSTRG.1789.4 | CTR5   | CTR  | 30.6014  | 0.0526 |
|            | MSTRG.1789.4 | HIGH_1 | HIGH | 25.087   | 0.0385 |
|            | MSTRG.1789.4 | HIGH_2 | HIGH | 52.8439  | 0.0882 |
|            | MSTRG.1789.4 | HIGH_3 | HIGH | 27.6928  | 0.0571 |
| MSTRG.1789 | MSTRG.1789.5 | CTR1   | CTR  | 0.0      | 0.0    |
|            | MSTRG.1789.5 | CTR2   | CTR  | 20.9907  | 0.0233 |
|            | MSTRG.1789.5 | CTR3   | CTR  | 0.0      | 0.0    |
|            | MSTRG.1789.5 | CTR4   | CTR  | 13.9685  | 0.0172 |
|            | MSTRG.1789.5 | CTR5   | CTR  | 0.0      | 0.0    |
|            | MSTRG.1789.5 | HIGH_1 | HIGH | 0.0      | 0.0    |
|            | MSTRG.1789.5 | HIGH_2 | HIGH | 0.0      | 0.0    |

|              |        |      |         |        |
|--------------|--------|------|---------|--------|
| MSTRG.1789.5 | HIGH_3 | HIGH | 27.6928 | 0.0571 |
|--------------|--------|------|---------|--------|

**Supplementary Table 4. Genes with polyA tail length difference in Riccia fluitans thallus after high-dose micro-/nanoplastic treatment**

| Gene_ID     | mean<br>CTR | mean<br>HIGH | diff_polyA<br>length | cohen<br>cohen_d | cohen<br>effect | padj     | Log2FC   | Marchantia<br>Gene.ID | Percentage<br>coverage | INSD_ID  | Perc     | Arabidopsis<br>geneID | Arabidopsis<br>Ident | Arabidopsis description                                                                             | Arabidopsis<br>gene_ID | Arabidopsis<br>coverage |
|-------------|-------------|--------------|----------------------|------------------|-----------------|----------|----------|-----------------------|------------------------|----------|----------|-----------------------|----------------------|-----------------------------------------------------------------------------------------------------|------------------------|-------------------------|
| MSTRG.10093 | 97,915      | 73,753       | -24,16               | 0,381379         | medium          | 1,21E-06 | -0,40883 | Mp3g03990             | 82,881                 | PTQ44036 | 0,995833 | AT2G39730             | 74,115               | rubisco activase [Source:NCBI gene (formerly Entrezgene);Acc:818558]                                | RCA                    | 0,94514768              |
| MSTRG.10096 | 64,344      | 36,061       | -28,28               | 0,498334         | medium          | 4,31E-28 | -0,83539 | Mp2g16300             | 91,827                 | PTQ30605 | 0,945455 | AT5G59240             | 79,803               | Ribosomal protein S8e family protein [Source:NCBI gene (formerly Entrezgene);Acc:836042]            | AT5G59240              | 0,92857143              |
| MSTRG.10180 | 75,686      | 61,513       | -14,17               | 0,22874          | medium          | 0,004711 | -0,29913 | Mp3g05840             | 83,721                 | PTQ48015 | 0,871622 | AT1G79040             | 59,167               | photosystem II subunit R [Source:NCBI gene (formerly Entrezgene);Acc:844245]                        | PSBR                   | 0,84285714              |
| MSTRG.10292 | 84,392      | 44,605       | -39,79               | 0,506128         | large           | 0,009584 | -0,91989 | NA                    | NA                     | NA       | NA       | NA                    | NA                   | NA                                                                                                  | NA                     | NA                      |
| MSTRG.10599 | 90,122      | 20,450       | -69,67               | 0,863657         | large           | 0,032776 | -2,13979 | Mp3g00870             | 84,308                 | PTQ47641 | 0,998571 | AT5G13560             | 36,62                | structural maintenance of chromosomes protein [Source:NCBI gene (formerly Entrezgene);Acc:831200]   | AT5G13560              | 0,99852725              |
| MSTRG.10660 | 108,424     | 71,689       | -36,74               | 0,460433         | medium          | 0,018966 | -0,59686 | NA                    | NA                     | NA       | NA       | NA                    | NA                   | NA                                                                                                  | NA                     | NA                      |
| MSTRG.10907 | 77,566      | 62,694       | -14,87               | 0,231879         | medium          | 2,79E-07 | -0,3071  | Mp4g15080             | 81,081                 | PTQ30828 | 0,808743 | AT1G67090             | 62,406               | ribulose biphosphate carboxylase small chain 1A [Source:NCBI gene (formerly Entrezgene);Acc:843029] | RBCS1A                 | 0,73333333              |
| MSTRG.10923 | 75,281      | 55,707       | -19,57               | 0,334154         | medium          | 8,81E-07 | -0,43443 | Mp4g06050             | 80,392                 | PTQ31242 | 0,836066 | AT1G67090             | 62,406               | ribulose biphosphate carboxylase small chain 1A [Source:NCBI gene (formerly Entrezgene);Acc:843029] | RBCS1A                 | 0,73333333              |
| MSTRG.10929 | 70,329      | 56,053       | -14,28               | 0,247682         | medium          | 0,002253 | -0,32734 | Mp4g06050             | 81,046                 | PTQ31242 | 0,836066 | AT1G67090             | 62,406               | ribulose biphosphate carboxylase small chain 1A [Source:NCBI gene (formerly Entrezgene);Acc:843029] | RBCS1A                 | 0,73333333              |
| MSTRG.10930 | 80,947      | 66,936       | -14,01               | 0,231984         | medium          | 3,76E-08 | -0,27419 | Mp4g06050             | 80,128                 | PTQ31242 | 0,852459 | AT1G67090             | 62,406               | ribulose biphosphate carboxylase small chain 1A [Source:NCBI gene (formerly Entrezgene);Acc:843029] | RBCS1A                 | 0,73333333              |
| MSTRG.10931 | 82,369      | 46,051       | -36,32               | 0,623323         | large           | 5,39E-16 | -0,83887 | Mp4g06050             | 79,487                 | PTQ31242 | 0,852459 | AT1G67090             | 64,341               | ribulose biphosphate carboxylase small chain 1A [Source:NCBI gene (formerly Entrezgene);Acc:843029] | RBCS1A                 | 0,71111111              |
| MSTRG.11548 | 79,671      | 58,705       | -20,97               | 0,387719         | medium          | 0,017524 | -0,44058 | Mp4g00930             | 91,513                 | PTQ36092 | 0,967857 | AT1G61520             | 81,897               | PSI type III chlorophyll a/b-binding protein [Source:NCBI gene (formerly Entrezgene);Acc:842446]    | LHCA3                  | 0,84981685              |
| MSTRG.11699 | 77,098      | 62,602       | -14,50               | 0,263317         | medium          | 0,004855 | -0,30048 | Mp4g02720             | 79,141                 | PTQ34404 | 1        | AT1G76100             | 42,105               | plastocyanin 1 [Source:NCBI gene (formerly Entrezgene);Acc:843942]                                  | PETE1                  | 1                       |

|             |         |         |        |          |        |          |          |           |        |          |          |           |        |                                                                                                                              |           |            |
|-------------|---------|---------|--------|----------|--------|----------|----------|-----------|--------|----------|----------|-----------|--------|------------------------------------------------------------------------------------------------------------------------------|-----------|------------|
| MSTRG.11863 | 90,374  | 58,574  | -31,80 | 0,517769 | large  | 0,020195 | -0,62565 | Mp5g00480 | 65,049 | PTQ34645 | 1        | AT5G40370 | 70,192 | Glutaredoxin family protein [Source:NCBI gene (formerly Entrezgene);Acc:834035]                                              | GRXC2     | 0,93693694 |
| MSTRG.13315 | 67,607  | 112,644 | 45,04  | 0,745764 | large  | 0,000582 | 0,736529 | NA        | NA     | NA       | NA       | NA        | NA     | NA                                                                                                                           | NA        | NA         |
| MSTRG.1401  | 93,562  | 55,550  | -38,01 | 0,502274 | large  | 0,006069 | -0,75214 | NA        | NA     | NA       | NA       | NA        | NA     | NA                                                                                                                           | NA        | NA         |
| MSTRG.14027 | 73,134  | 49,944  | -23,19 | 0,365332 | medium | 0,03136  | -0,55021 | Mp5g19870 | 89,351 | PTQ27329 | 1        | AT4G04640 | 79,154 | ATPase, F1 complex, gamma subunit protein [Source:NCBI gene (formerly Entrezgene);Acc:825797]                                | ATPC1     | 0,88739946 |
| MSTRG.14033 | 35,344  | 30,681  | -4,66  | 0,077794 | small  | 3,51E-28 | -0,20415 | NA        | NA     | NA       | NA       | NA        | NA     | NA                                                                                                                           | NA        | NA         |
| MSTRG.14355 | 101,020 | 79,971  | -21,05 | 0,315812 | medium | 0,027961 | -0,33708 | Mp6g19070 | 58,647 | PTQ39516 | 0,872093 | AT3G14360 | 40,664 | alpha/beta-Hydrolases superfamily protein [Source:NCBI gene (formerly Entrezgene);Acc:820657]                                | AT3G14360 | 0,87258687 |
| MSTRG.14442 | 67,585  | 45,578  | -22,01 | 0,319356 | medium | 9,07E-06 | -0,56838 | NA        | NA     | NA       | NA       | NA        | NA     | NA                                                                                                                           | NA        | NA         |
| MSTRG.15091 | 76,142  | 21,286  | -54,86 | 0,943284 | large  | 0,025087 | -1,83881 | Mp6g00590 | 71,501 | PTQ31968 | 0,967901 | AT5G23060 | 44,543 | calcium sensing receptor [Source:NCBI gene (formerly Entrezgene);Acc:832370]                                                 | CaS       | 0,87338501 |
| MSTRG.15223 | 78,976  | 20,077  | -58,90 | 1,00734  | large  | 0,017524 | -1,97588 | Mp6g17130 | 88,241 | PTQ29280 | 0,878199 | AT5G25060 | 67,945 | RNA recognition motif (RRM)-containing protein [Source:NCBI gene (formerly Entrezgene);Acc:832577]                           | RRC1      | 0,7167019  |
| MSTRG.1565  | 102,387 | 21,429  | -80,96 | 0,968912 | large  | 0,029806 | -2,25642 | Mp1g26280 | 83,465 | PTQ49800 | 1        | AT5G36790 | 73,817 | Haloacid dehalogenase-like hydrolase (HAD) superfamily protein [Source:NCBI gene (formerly Entrezgene);Acc:833646]           | AT5G36790 | 0,87569061 |
| MSTRG.16217 | 76,563  | 27,615  | -48,95 | 1,019436 | large  | 0,040939 | -1,47117 | Mp4g00350 | 92,929 | PTQ36158 | 1        | AT1G65700 | 80,612 | Small nuclear ribonucleoprotein family protein [Source:NCBI gene (formerly Entrezgene);Acc:842881]                           | LSM8      | 1          |
| MSTRG.16614 | 106,192 | 53,615  | -52,58 | 0,779234 | large  | 4,24E-05 | -0,98596 | Mp5g04090 | 65,728 | PTQ29437 | 0,990698 | AT2G30870 | 47,222 | glutathione S-transferase PHI 10 [Source:NCBI gene (formerly Entrezgene);Acc:817637]                                         | GSTF10    | 0,99534884 |
| MSTRG.1679  | 91,097  | 25,067  | -66,03 | 0,810726 | large  | 0,009584 | -1,86163 | Mp1g26230 | 75     | PTQ49805 | 1        | AT2G43320 | 45,875 | S-adenosyl-L-methionine-dependent methyltransferases superfamily protein [Source:NCBI gene (formerly Entrezgene);Acc:818933] | AT2G43320 | 0,83475783 |
| MSTRG.17617 | 91,215  | 67,376  | -23,84 | 0,372081 | medium | 4,47E-08 | -0,43704 | Mp7g05880 | 92,509 | PTQ37465 | 1        | AT2G05100 | 79,401 | photosystem II light harvesting complex protein 2.1 [Source:NCBI gene (formerly Entrezgene);Acc:815058]                      | LHCB2.1   | 1          |

|             |        |         |        |          |        |          |          |           |        |          |          |           |        |                                                                                                         |           |            |
|-------------|--------|---------|--------|----------|--------|----------|----------|-----------|--------|----------|----------|-----------|--------|---------------------------------------------------------------------------------------------------------|-----------|------------|
| MSTRG.17620 | 93,813 | 62,058  | -31,75 | 0,476241 | medium | 0,008402 | -0,59617 | Mp7g05980 | 90,226 | PTQ37438 | 1        | AT2G05100 | 78,947 | photosystem II light harvesting complex protein 2.1 [Source:NCBI gene (formerly Entrezgene);Acc:815058] | LHCB2.1   | 1          |
| MSTRG.17622 | 80,804 | 66,308  | -14,50 | 0,249328 | medium | 0,033162 | -0,28525 | Mp7g05890 | 91,729 | PTQ37464 | 1        | AT3G27690 | 78,277 | photosystem II light harvesting complex protein 2.3 [Source:NCBI gene (formerly Entrezgene);Acc:822391] | LHCB2.3   | 1          |
| MSTRG.18014 | 82,962 | 52,659  | -30,30 | 0,554089 | large  | 0,007621 | -0,65579 | Mp5g16260 | 56,531 | PTQ27738 | 0,823636 | AT5G42650 | 45,342 | allene oxide synthase [Source:NCBI gene (formerly Entrezgene);Acc:834273]                               | AOS       | 0,90540541 |
| MSTRG.18264 | 68,090 | 74,234  | 6,14   | 0,107752 | small  | 0,040939 | 0,124654 | Mp7g06770 | 90,602 | PTQ27424 | 1        | AT2G05100 | 79,623 | photosystem II light harvesting complex protein 2.1 [Source:NCBI gene (formerly Entrezgene);Acc:815058] | LHCB2.1   | 1          |
| MSTRG.19323 | 66,696 | 53,449  | -13,25 | 0,250708 | medium | 0,018346 | -0,31944 | NA        | NA     | NA       | NA       | NA        | NA     | NA                                                                                                      | NA        | NA         |
| MSTRG.20086 | 82,642 | 42,474  | -40,17 | 0,555218 | large  | 0,031714 | -0,96031 | Mp8g01550 | 81,818 | PTQ36359 | 0,985694 | AT5G57190 | 59,385 | phosphatidylserine decarboxylase 2 [Source:NCBI gene (formerly Entrezgene);Acc:835825]                  | PSD2      | 0,96220472 |
| MSTRG.20702 | 75,340 | 58,256  | -17,08 | 0,276378 | medium | 0,007621 | -0,37102 | Mp8g01210 | 94     | PTQ36398 | 1        | AT1G08380 | 61,806 | photosystem I subunit O [Source:NCBI gene (formerly Entrezgene);Acc:837358]                             | PSAO      | 0,98571429 |
| MSTRG.20729 | 32,017 | 89,769  | 57,75  | 1,827241 | large  | 0,004043 | 1,487372 | NA        | NA     | NA       | NA       | NA        | NA     | NA                                                                                                      | NA        | NA         |
| MSTRG.20952 | 71,866 | 20,087  | -51,78 | 0,709439 | large  | 0,010738 | -1,83905 | Mp8g17710 | 80,301 | PTQ42375 | 0,906203 | AT1G80030 | 59,122 | Molecular chaperone Hsp40/DnaJ family protein [Source:NCBI gene (formerly Entrezgene);Acc:844343]       | AT1G80030 | 0,86213992 |
| MSTRG.2101  | 74,458 | 58,779  | -15,68 | 0,235891 | medium | 2,21E-07 | -0,34112 | Mp1g25670 | 71,523 | PTQ49869 | 0,814208 | AT4G01150 | 57,037 | CURVATURE THYLAKOID 1A-like protein [Source:NCBI gene (formerly Entrezgene);Acc:828181]                 | AT4G01150 | 0,79878049 |
| MSTRG.21398 | 64,433 | 42,541  | -21,89 | 0,310734 | medium | 1,25E-05 | -0,59893 | NA        | NA     | NA       | NA       | NA        | NA     | NA                                                                                                      | NA        | NA         |
| MSTRG.21697 | 69,697 | 51,026  | -18,67 | 0,206935 | medium | 0,005043 | -0,44985 | Mp8g17190 | 85,817 | PTQ42306 | 0,964455 | AT2G26900 | 79,133 | Sodium Bile acid symporter family [Source:NCBI gene (formerly Entrezgene);Acc:817231]                   | BASS2     | 0,89242054 |
| MSTRG.22000 | 30,456 | 27,639  | -2,82  | 0,047717 | small  | 0,017524 | -0,14004 | NA        | NA     | NA       | NA       | NA        | NA     | NA                                                                                                      | NA        | NA         |
| MSTRG.22001 | 33,381 | 28,150  | -5,23  | 0,085861 | small  | 0,000856 | -0,24588 | NA        | NA     | NA       | NA       | NA        | NA     | NA                                                                                                      | NA        | NA         |
| MSTRG.22072 | 34,395 | 30,010  | -4,39  | 0,069052 | small  | 0,005678 | -0,19677 | NA        | NA     | NA       | NA       | NA        | NA     | NA                                                                                                      | NA        | NA         |
| MSTRG.22082 | 36,139 | 32,672  | -3,47  | 0,05625  | small  | 0,025087 | -0,1455  | NA        | NA     | NA       | NA       | NA        | NA     | NA                                                                                                      | NA        | NA         |
| MSTRG.22180 | 47,441 | 103,133 | 55,69  | 1,497133 | large  | 0,00594  | 1,120299 | Mp8g07700 | 64,23  | PTQ45767 | 0,997382 | AT1G79310 | 35,266 | metacaspase 7 [Source:NCBI gene (formerly Entrezgene);Acc:844269]                                       | MC7       | 0,99751861 |

|            |         |        |        |          |        |          |          |           |        |          |          |           |        |                                                                                                                             |           |            |
|------------|---------|--------|--------|----------|--------|----------|----------|-----------|--------|----------|----------|-----------|--------|-----------------------------------------------------------------------------------------------------------------------------|-----------|------------|
| MSTRG.2292 | 88,504  | 47,682 | -40,82 | 0,550697 | large  | 0,020195 | -0,8923  | Mp1g01210 | 93,817 | PTQ42624 | 0,98153  | AT4G18360 | 79,437 | Aldolase-type TIM barrel family protein [Source:NCBI gene (formerly Entrezgene);Acc:827563]                                 | GOX3      | 0,96467391 |
| MSTRG.2913 | 71,175  | 86,544 | 15,37  | 0,248499 | medium | 0,005678 | 0,282073 | Mp6g00480 | 56,688 | PTQ31982 | 0,907514 | AT2G16060 | 52,597 | hemoglobin 1 [Source:NCBI gene (formerly Entrezgene);Acc:816103]                                                            | HB1       | 0,95       |
| MSTRG.3622 | 83,594  | 66,513 | -17,08 | 0,283586 | medium | 4,71E-05 | -0,32977 | Mp1g29620 | 92,885 | PTQ29535 | 0,94403  | AT2G05070 | 77,866 | photosystem II light harvesting complex protein 2.2 [Source:NCBI gene (formerly Entrezgene);Acc:815055]                     | LHCB2.2   | 0,95471698 |
| MSTRG.3734 | 82,896  | 42,955 | -39,94 | 0,549443 | large  | 0,02175  | -0,94849 | NA        | NA     | NA       | NA       | NA        | NA     | NA                                                                                                                          | NA        | NA         |
| MSTRG.3753 | 82,736  | 30,273 | -52,46 | 0,749214 | large  | 0,034138 | -1,45049 | NA        | NA     | NA       | NA       | NA        | NA     | NA                                                                                                                          | NA        | NA         |
| MSTRG.4325 | 88,197  | 43,826 | -44,37 | 0,719764 | large  | 0,033162 | -1,00894 | NA        | NA     | NA       | NA       | NA        | NA     | NA                                                                                                                          | NA        | NA         |
| MSTRG.4969 | 87,569  | 32,500 | -55,07 | 0,751849 | large  | 3,76E-07 | -1,42999 | Mp2g13120 | 98,065 | PTQ43179 | 1        | AT1G14400 | 55,705 | ubiquitin carrier protein 1 [Source:NCBI gene (formerly Entrezgene);Acc:838002]                                             | UBC1      | 0,97368421 |
| MSTRG.5435 | 54,880  | 52,890 | -1,99  | 0,039892 | small  | 0,025087 | -0,05329 | NA        | NA     | NA       | NA       | NA        | NA     | NA                                                                                                                          | NA        | NA         |
| MSTRG.5453 | 72,809  | 57,457 | -15,35 | 0,267115 | medium | 6,56E-05 | -0,34164 | Mp2g15250 | 67,48  | PTQ34171 | 0,86014  | AT1G60950 | 59,836 | 2Fe-2S ferredoxin-like superfamily protein [Source:NCBI gene (formerly Entrezgene);Acc:842386]                              | FED A     | 0,82432432 |
| MSTRG.5483 | 66,941  | 47,578 | -19,36 | 0,394039 | medium | 0,047378 | -0,4926  | NA        | NA     | NA       | NA       | NA        | NA     | NA                                                                                                                          | NA        | NA         |
| MSTRG.6656 | 101,439 | 62,478 | -38,96 | 0,557716 | large  | 0,023484 | -0,6992  | NA        | NA     | NA       | NA       | NA        | NA     | NA                                                                                                                          | NA        | NA         |
| MSTRG.6668 | 67,627  | 44,628 | -23,00 | 0,401553 | medium | 3,76E-08 | -0,59966 | Mp2g26040 | 77,576 | PTQ43383 | 0,976331 | AT3G16640 | 75,152 | translationally controlled tumor protein [Source:NCBI gene (formerly Entrezgene);Acc:820916]                                | TCTP      | 0,98214286 |
| MSTRG.6768 | 44,579  | 88,955 | 44,38  | 0,807677 | large  | 8,26E-07 | 0,996694 | Mp2g18420 | 73,731 | PTQ28010 | 0,928131 | AT1G01300 | 41,355 | Eukaryotic aspartyl protease family protein [Source:NCBI gene (formerly Entrezgene);Acc:839375]                             | AT1G01300 | 0,83505155 |
| MSTRG.6859 | 94,865  | 64,022 | -30,84 | 0,434511 | medium | 0,047901 | -0,5673  | NA        | NA     | NA       | NA       | NA        | NA     | NA                                                                                                                          | NA        | NA         |
| MSTRG.7289 | 65,852  | 84,273 | 18,42  | 0,232355 | medium | 0,025087 | 0,355837 | Mp2g24510 | 82,766 | PTQ26995 | 1        | AT3G02630 | 66,998 | Plant stearoyl-acyl-carrier-protein desaturase family protein [Source:NCBI gene (formerly Entrezgene);Acc:820773]           | AT3G02630 | 0,99494949 |
| MSTRG.7379 | 71,843  | 80,385 | 8,54   | 0,145233 | small  | 0,025087 | 0,162082 | NA        | NA     | NA       | NA       | NA        | NA     | NA                                                                                                                          | NA        | NA         |
| MSTRG.7635 | 135,600 | 73,184 | -62,42 | 0,880876 | large  | 3,15E-05 | -0,88975 | NA        | NA     | NA       | NA       | NA        | NA     | NA                                                                                                                          | NA        | NA         |
| MSTRG.7830 | 77,424  | 41,941 | -35,48 | 0,55879  | large  | 0,02175  | -0,88441 | NA        | NA     | NA       | NA       | NA        | NA     | NA                                                                                                                          | NA        | NA         |
| MSTRG.9204 | 92,307  | 34,300 | -58,01 | 1,111084 | large  | 0,022193 | -1,42823 | Mp3g18890 | 83,172 | PTQ29375 | 1        | AT4G14680 | 76,123 | Pseudouridine synthase/archaeosine transglycosylase-like family protein [Source:NCBI gene (formerly Entrezgene);Acc:827118] | APS3      | 0,90967742 |

|            |        |        |        |          |        |          |          |           |        |          |          |           |        |                                                                                                               |           |            |
|------------|--------|--------|--------|----------|--------|----------|----------|-----------|--------|----------|----------|-----------|--------|---------------------------------------------------------------------------------------------------------------|-----------|------------|
| MSTRG.9279 | 83,207 | 11,250 | -71,96 | 1,035317 | large  | 0,027629 | -2,88678 | Mp3g18020 | 93,934 | PTQ29511 | 0,978261 | AT5G18610 | 67,167 | Protein kinase superfamily protein<br>[Source:NCBI gene (formerly<br>Entrezgene);Acc:831979]                  | AT5G18610 | 0,97660819 |
| MSTRG.938  | 71,375 | 55,454 | -15,92 | 0,27595  | medium | 0,000749 | -0,36414 | Mp1g23580 | 83,051 | PTQ36199 | 0,967213 | AT3G06680 | 73,333 | Ribosomal L29e protein family<br>[Source:NCBI gene (formerly<br>Entrezgene);Acc:819853]                       | AT3G06680 | 0,96721311 |
| MSTRG.9729 | 97,674 | 38,077 | -59,60 | 1,042671 | large  | 0,031714 | -1,35906 | Mp3g11460 | 77,014 | PTQ40870 | 1        | AT2G05990 | 81,973 | NAD(P)-binding Rossmann-fold<br>superfamily protein [Source:NCBI<br>gene (formerly<br>Entrezgene);Acc:815152] | MOD1      | 0,75384615 |



**Supplementary Table 6 Gene ontology and KEGG pathways annotation of *Riccia fluitans* differentially expressed genes (DEGs) engaged in response to high-dose of micro-/nanoplastic (MNP) pollution**

| source | term_name              | term_id    | adjusted_p | negative_lo | term_size | query_size | intersection | intersections                                                                                                                                                                                                                                                                                                                                                                                                                                                                                                                                                                                                                                                                                                                                                                                                                                                                                                                                                                                                                                                                                                                                                                                                                                                                                                                                                                                                                                                                                             |
|--------|------------------------|------------|------------|-------------|-----------|------------|--------------|-----------------------------------------------------------------------------------------------------------------------------------------------------------------------------------------------------------------------------------------------------------------------------------------------------------------------------------------------------------------------------------------------------------------------------------------------------------------------------------------------------------------------------------------------------------------------------------------------------------------------------------------------------------------------------------------------------------------------------------------------------------------------------------------------------------------------------------------------------------------------------------------------------------------------------------------------------------------------------------------------------------------------------------------------------------------------------------------------------------------------------------------------------------------------------------------------------------------------------------------------------------------------------------------------------------------------------------------------------------------------------------------------------------------------------------------------------------------------------------------------------------|
| GO:MF  | catalytic activity     | GO:0003824 | 2.41630113 | 13.6168489  | 9606      | 205        | 145          | AT5G05340,AT5G54510,AT2G37050,AT1G69220,AT1G61700,AT4G37270,AT5G04870,AT5G20350,AT1G65930,AT4G29130,AT1G13440,AT5G04040,AT1G36370,AT3G58670,AT1G72030,AT3G54940,AT1G50450,AT4G16600,AT5G56300,AT5G51070,AT5G39040,AT5G38200,AT5G13930,AT2G06990,AT1G56310,AT4G12570,AT2G22910,AT2G34770,AT2G20630,AT2G35840,AT2G37040,AT2G38240,AT2G22240,AT1G27680,AT1G17500,AT4G36750,AT5G18150,AT4G31390,AT1G49340,AT4G27800,AT3G01510,AT4G27030,AT1G07920,AT5G37600,AT1G64680,AT5G54130,AT5G44730,AT1G74960,AT1G78570,AT2G26080,AT3G58690,AT1G07010,AT3G22370,AT2G38110,AT5G59840,AT3G51370,AT5G48300,AT3G51680,AT3G19380,AT4G04955,AT1G64060,AT4G32410,AT4G30310,AT5G05700,AT2G41480,AT3G02470,AT4G38030,AT2G17700,AT5G08650,AT4G01210,AT1G02520,AT5G64120,AT2G39800,AT2G35660,AT5G62220,AT1G17840,AT2G30490,AT1G31910,AT3G52090,AT4G33030,AT5G03860,AT4G21990,AT2G36530,AT1G68560,AT5G13030,AT1G52510,AT1G01040,AT4G18360,AT4G20360,AT5G03940,AT2G42600,AT3G29090,AT5G64940,AT5G48930,AT4G11350,AT5G49740,AT1G32900,AT1G01050,AT1G28440,AT1G62330,AT4G36530,AT5G13650,AT4G24040,AT2G22780,AT1G48130,AT1G07810,AT5G13630,AT1G74380,AT3G54100,AT4G01370,AT4G26270,AT5G19730,AT4G25130,AT4G02280,AT1G76690,AT3G58140,AT3G17020,AT5G55180,AT1G54350,AT1G10630,AT2G32810,AT1G64970,AT3G21720,AT3G15730,AT5G22300,AT4G26850,AT1G54570,AT5G63930,AT4G37870,AT5G57800,AT3G11470,AT2G21070,AT3G52940,AT3G55800,AT2G38960,AT4G02500,AT4G04350,AT1G57590,AT5G06720,AT5G53450,AT4G14680,AT3G07720,AT5G42270,AT2G24270,AT5G13420 |
| GO:MF  | small molecule binding | GO:0036094 | 0.00000276 | 5.55867702  | 6804      | 205        | 100          | AT5G05340,AT2G37050,AT1G69220,AT1G61700,AT4G37270,AT5G04870,AT5G20350,AT1G65930,AT4G29130,AT1G13440,AT1G36370,AT3G58670,AT4G16600,AT5G56300,AT5G51070,AT5G39040,AT5G02500,AT2G06990,AT2G34770,AT5G17170,AT2G20630,AT2G35840,AT2G38240,AT1G27680,AT1G17500,AT4G36750,AT4G31390,AT3G42860,AT1G49340,AT4G27800,AT1G07920,AT5G37600,AT1G64680,AT5G54130,AT2G26080,AT3G58690,AT1G07010,AT3G22370,AT5G59840,AT3G51370,AT5G48300,AT1G24620,AT4G04955,AT1G64060,AT4G32410,AT1G60950,AT2G41480,AT2G17700,AT5G08650,AT3G23660,AT1G02520,AT5G64120,AT2G39800,AT2G35660,AT1G17840,AT2G30490,AT1G31910,AT4G33030,AT4G21990,AT3G47550,AT2G36530,AT5G13030,AT1G01040,AT4G18360,AT4G20360,AT1G77090,AT5G03940,AT5G19420,AT5G64940,AT5G49740,AT1G01050,AT1G28440,AT5G67480,AT5G13650,AT1G07810,AT5G13630,AT4G01370,AT5G35735,AT4G26270,AT1G76690,AT2G47450,AT3G58140,AT1G54350,AT1G10630,AT3G21720,AT3G24430,AT3G15730,AT4G26850,AT5G63930,AT4G37870,AT5G57800,AT3G11470,AT3G52940,AT3G55800,AT2G38960,AT4G04350,AT5G06720,AT5G53450,AT4G14680,AT5G42270                                                                                                                                                                                                                                                                                                                                                                                                                                                                   |

|       |                              |            |            |            |      |     |                                                                                                                                                                                                                                                                                                                                                                                                                                                                                                                                                                                                                                                                                                                                                                                                                                                                                                                                                                                                                        |
|-------|------------------------------|------------|------------|------------|------|-----|------------------------------------------------------------------------------------------------------------------------------------------------------------------------------------------------------------------------------------------------------------------------------------------------------------------------------------------------------------------------------------------------------------------------------------------------------------------------------------------------------------------------------------------------------------------------------------------------------------------------------------------------------------------------------------------------------------------------------------------------------------------------------------------------------------------------------------------------------------------------------------------------------------------------------------------------------------------------------------------------------------------------|
| GO:MF | ion binding                  | GO:0043167 | 0.00000534 | 5.27207228 | 6685 | 205 | 98 AT5G05340,AT2G37050,AT1G69220,AT1G61700,AT4G37270,AT5G04870,AT1G65930,AT4G29130,AT1G13440,AT1G36370,AT3G58670,AT4G16600,AT5G56300,AT5G51070,AT5G39040,AT5G02500,AT2G06990,AT2G34770,AT5G17170,AT2G20630,AT2G35840,AT2G38240,AT1G27680,AT1G17500,AT4G36750,AT4G31390,AT3G42860,AT1G49340,AT4G27800,AT1G07920,AT5G37600,AT1G64680,AT5G54130,AT2G26080,AT3G58690,AT1G07010,AT3G22370,AT5G59840,AT3G51370,AT5G48300,AT1G24620,AT4G04955,AT1G64060,AT4G32410,AT1G60950,AT2G41480,AT2G17700,AT5G08650,AT3G23660,AT1G02520,AT5G64120,AT2G39800,AT2G35660,AT1G17840,AT2G30490,AT1G31910,AT4G33030,AT4G21990,AT3G47550,AT2G36530,AT5G13030,AT1G01040,AT4G18360,AT4G20360,AT1G77090,AT5G03940,AT5G19420,AT5G64940,AT5G49740,AT1G01050,AT1G28440,AT5G67480,AT5G13650,AT1G07810,AT5G13630,AT4G01370,AT5G35735,AT4G26270,AT1G76690,AT2G47450,AT3G58140,AT1G54350,AT1G10630,AT3G21720,AT3G24430,AT3G15730,AT4G26850,AT5G63930,AT4G37870,AT5G57800,AT3G11470,AT3G55800,AT2G38960,AT4G04350,AT5G06720,AT5G53450,AT4G14680,AT5G42270 |
| GO:MF | nucleotide binding           | GO:0000166 | 0.00063850 | 3.19483312 | 3173 | 205 | 54 AT2G37050,AT1G69220,AT4G37270,AT5G04870,AT1G65930,AT4G29130,AT1G13440,AT5G51070,AT5G39040,AT5G02500,AT2G06990,AT1G27680,AT1G17500,AT4G36750,AT4G31390,AT1G07920,AT5G37600,AT2G26080,AT3G58690,AT5G59840,AT5G48300,AT2G17700,AT5G08650,AT1G02520,AT2G39800,AT2G35660,AT1G17840,AT1G31910,AT5G13030,AT1G01040,AT4G18360,AT4G20360,AT5G03940,AT5G64940,AT1G28440,AT5G13650,AT1G07810,AT5G13630,AT4G01370,AT4G26270,AT1G76690,AT3G58140,AT1G54350,AT1G10630,AT3G24430,AT4G26850,AT5G63930,AT4G37870,AT3G52940,AT2G38960,AT4G04350,AT5G53450,AT4G14680,AT5G42270                                                                                                                                                                                                                                                                                                                                                                                                                                                         |
| GO:MF | nucleoside phosphate binding | GO:1901265 | 0.00067687 | 3.16949121 | 3179 | 205 | 54 AT2G37050,AT1G69220,AT4G37270,AT5G04870,AT1G65930,AT4G29130,AT1G13440,AT5G51070,AT5G39040,AT5G02500,AT2G06990,AT1G27680,AT1G17500,AT4G36750,AT4G31390,AT1G07920,AT5G37600,AT2G26080,AT3G58690,AT5G59840,AT5G48300,AT2G17700,AT5G08650,AT1G02520,AT2G39800,AT2G35660,AT1G17840,AT1G31910,AT5G13030,AT1G01040,AT4G18360,AT4G20360,AT5G03940,AT5G64940,AT1G28440,AT5G13650,AT1G07810,AT5G13630,AT4G01370,AT4G26270,AT1G76690,AT3G58140,AT1G54350,AT1G10630,AT3G24430,AT4G26850,AT5G63930,AT4G37870,AT3G52940,AT2G38960,AT4G04350,AT5G53450,AT4G14680,AT5G42270                                                                                                                                                                                                                                                                                                                                                                                                                                                         |
| GO:MF | anion binding                | GO:0043168 | 0.00069882 | 3.15562962 | 3268 | 205 | 55 AT2G37050,AT1G69220,AT4G37270,AT5G04870,AT4G29130,AT1G13440,AT1G36370,AT5G51070,AT5G39040,AT5G02500,AT2G06990,AT1G27680,AT1G17500,AT4G36750,AT4G31390,AT1G49340,AT1G07920,AT5G37600,AT2G26080,AT3G58690,AT5G59840,AT5G48300,AT2G17700,AT5G08650,AT1G02520,AT2G39800,AT2G35660,AT1G17840,AT1G31910,AT5G13030,AT1G01040,AT4G18360,AT4G20360,AT5G03940,AT5G64940,AT1G28440,AT5G13650,AT1G07810,AT5G13630,AT4G01370,AT4G26270,AT1G76690,AT3G58140,AT1G54350,AT1G10630,AT3G24430,AT3G15730,AT4G26850,AT5G63930,AT4G37870,AT2G38960,AT4G04350,AT5G53450,AT4G14680,AT5G42270                                                                                                                                                                                                                                                                                                                                                                                                                                               |

|       |                                            |            |            |            |      |     |                                                                                                                                                                                                                                                                                                                                                                                                                                                                                                                                                                          |
|-------|--------------------------------------------|------------|------------|------------|------|-----|--------------------------------------------------------------------------------------------------------------------------------------------------------------------------------------------------------------------------------------------------------------------------------------------------------------------------------------------------------------------------------------------------------------------------------------------------------------------------------------------------------------------------------------------------------------------------|
| GO:MF | heterocyclic compound binding              | GO:1901363 | 0.00101046 | 2.99548055 | 3307 | 205 | 55 AT2G37050,AT1G69220,AT4G37270,AT5G04870,AT1G65930,AT4G29130,AT1G13440,AT1G36370,AT5G51070,AT5G39040,AT5G02500,AT2G06990,AT1G27680,AT1G17500,AT4G36750,AT4G31390,AT1G07920,AT5G37600,AT2G26080,AT3G58690,AT5G59840,AT5G48300,AT2G17700,AT5G08650,AT1G02520,AT2G39800,AT2G35660,AT1G17840,AT1G31910,AT5G13030,AT1G01040,AT4G18360,AT4G20360,AT5G03940,AT5G64940,AT1G28440,AT5G13650,AT1G07810,AT5G13630,AT4G01370,AT4G26270,AT1G76690,AT3G58140,AT1G54350,AT1G10630,AT3G24430,AT4G26850,AT5G63930,AT4G37870,AT3G52940,AT2G38960,AT4G04350,AT5G53450,AT4G14680,AT5G42270 |
| GO:MF | ribonucleotide binding                     | GO:0032553 | 0.00198656 | 2.70189772 | 2865 | 205 | 49 AT2G37050,AT1G69220,AT4G37270,AT5G04870,AT4G29130,AT5G51070,AT5G39040,AT5G02500,AT2G06990,AT1G27680,AT1G17500,AT4G36750,AT4G31390,AT1G07920,AT5G37600,AT2G26080,AT3G58690,AT5G59840,AT5G48300,AT2G17700,AT5G08650,AT1G02520,AT2G39800,AT1G17840,AT1G31910,AT5G13030,AT1G01040,AT4G18360,AT4G20360,AT5G03940,AT5G64940,AT1G28440,AT5G13650,AT1G07810,AT5G13630,AT4G01370,AT4G26270,AT1G76690,AT3G58140,AT1G54350,AT1G10630,AT3G24430,AT4G26850,AT5G63930,AT4G37870,AT4G04350,AT5G53450,AT4G14680,AT5G42270                                                             |
| GO:MF | carbohydrate derivative binding            | GO:0097367 | 0.00297206 | 2.52694106 | 2907 | 205 | 49 AT2G37050,AT1G69220,AT4G37270,AT5G04870,AT4G29130,AT5G51070,AT5G39040,AT5G02500,AT2G06990,AT1G27680,AT1G17500,AT4G36750,AT4G31390,AT1G07920,AT5G37600,AT2G26080,AT3G58690,AT5G59840,AT5G48300,AT2G17700,AT5G08650,AT1G02520,AT2G39800,AT1G17840,AT1G31910,AT5G13030,AT1G01040,AT4G18360,AT4G20360,AT5G03940,AT5G64940,AT1G28440,AT5G13650,AT1G07810,AT5G13630,AT4G01370,AT4G26270,AT1G76690,AT3G58140,AT1G54350,AT1G10630,AT3G24430,AT4G26850,AT5G63930,AT4G37870,AT4G04350,AT5G53450,AT4G14680,AT5G42270                                                             |
| GO:MF | oxidoreductase activity                    | GO:0016491 | 0.00324040 | 2.48940083 | 1475 | 205 | 31 AT5G05340,AT1G65930,AT1G13440,AT3G58670,AT1G50450,AT2G34770,AT2G38240,AT4G36750,AT4G27030,AT1G78570,AT2G26080,AT3G22370,AT3G51680,AT1G64060,AT2G41480,AT5G64120,AT2G39800,AT2G35660,AT2G30490,AT4G21990,AT4G18360,AT5G49740,AT2G22780,AT1G48130,AT4G25130,AT1G76690,AT5G57800,AT3G52940,AT2G38960,AT5G06720,AT2G24270                                                                                                                                                                                                                                                 |
| GO:MF | purine nucleotide binding                  | GO:0017076 | 0.00537775 | 2.26939897 | 2971 | 205 | 49 AT2G37050,AT1G69220,AT4G37270,AT5G04870,AT1G65930,AT4G29130,AT1G13440,AT5G51070,AT5G39040,AT5G02500,AT2G06990,AT1G27680,AT1G17500,AT4G31390,AT1G07920,AT5G37600,AT2G26080,AT3G58690,AT5G59840,AT5G48300,AT2G17700,AT5G08650,AT1G02520,AT2G39800,AT1G17840,AT1G31910,AT5G13030,AT1G01040,AT4G20360,AT5G03940,AT5G64940,AT1G28440,AT5G13650,AT1G07810,AT5G13630,AT4G01370,AT4G26270,AT3G58140,AT1G54350,AT1G10630,AT3G24430,AT4G26850,AT5G63930,AT4G37870,AT3G52940,AT4G04350,AT5G53450,AT4G14680,AT5G42270                                                             |
| GO:MF | purine ribonucleoside triphosphate binding | GO:0035639 | 0.00574361 | 2.24081450 | 2722 | 205 | 46 AT2G37050,AT1G69220,AT4G37270,AT5G04870,AT4G29130,AT5G51070,AT5G39040,AT5G02500,AT2G06990,AT1G27680,AT1G17500,AT4G31390,AT1G07920,AT5G37600,AT2G26080,AT3G58690,AT5G59840,AT5G48300,AT2G17700,AT5G08650,AT1G02520,AT2G39800,AT1G17840,AT1G31910,AT5G13030,AT1G01040,AT4G20360,AT5G03940,AT5G64940,AT1G28440,AT5G13650,AT1G07810,AT5G13630,AT4G01370,AT4G26270,AT3G58140,AT1G54350,AT1G10630,AT3G24430,AT4G26850,AT5G63930,AT4G37870,AT4G04350,AT5G53450,AT4G14680,AT5G42270                                                                                           |

|       |                               |            |            |            |      |     |                                                                                                                                                                                                                                                                                                                                                                                                                                                                                                                                                                                                        |
|-------|-------------------------------|------------|------------|------------|------|-----|--------------------------------------------------------------------------------------------------------------------------------------------------------------------------------------------------------------------------------------------------------------------------------------------------------------------------------------------------------------------------------------------------------------------------------------------------------------------------------------------------------------------------------------------------------------------------------------------------------|
| GO:MF | purine ribonucleotide binding | GO:0032555 | 0.01689438 | 1.77225756 | 2841 | 205 | 46 AT2G37050,AT1G69220,AT4G37270,AT5G04870,AT4G29130,AT5G51070,AT5G39040,AT5G02500,AT2G06990,AT1G27680,AT1G17500,AT4G31390,AT1G07920,AT5G37600,AT2G26080,AT3G58690,AT5G59840,AT5G48300,AT2G17700,AT5G08650,AT1G02520,AT2G39800,AT1G17840,AT1G31910,AT5G13030,AT1G01040,AT4G20360,AT5G03940,AT5G64940,AT1G28440,AT5G13650,AT1G07810,AT5G13630,AT4G01370,AT4G26270,AT3G58140,AT1G54350,AT1G10630,AT3G24430,AT4G26850,AT5G63930,AT4G37870,AT4G04350,AT5G53450,AT4G14680,AT5G42270                                                                                                                         |
| GO:MF | metal ion binding             | GO:0046872 | 0.02211591 | 1.65529499 | 3948 | 205 | 58 AT5G05340,AT1G61700,AT4G37270,AT5G04870,AT1G65930,AT4G29130,AT1G13440,AT3G58670,AT4G16600,AT5G56300,AT2G34770,AT5G17170,AT2G20630,AT2G35840,AT2G38240,AT1G17500,AT3G42860,AT4G27800,AT5G37600,AT1G64680,AT5G54130,AT1G07010,AT3G22370,AT3G51370,AT1G24620,AT4G04955,AT1G64060,AT4G32410,AT1G60950,AT2G41480,AT3G23660,AT5G64120,AT2G30490,AT4G33030,AT4G21990,AT3G47550,AT2G36530,AT5G13030,AT1G01040,AT1G77090,AT5G19420,AT5G49740,AT1G01050,AT5G67480,AT1G07810,AT5G35735,AT4G26270,AT2G47450,AT1G10630,AT3G21720,AT3G24430,AT3G15730,AT4G37870,AT5G57800,AT3G11470,AT3G55800,AT5G06720,AT5G42270 |
| GO:MF | cation binding                | GO:0043169 | 0.02431090 | 1.61419883 | 3961 | 205 | 58 AT5G05340,AT1G61700,AT4G37270,AT5G04870,AT1G65930,AT4G29130,AT1G13440,AT3G58670,AT4G16600,AT5G56300,AT2G34770,AT5G17170,AT2G20630,AT2G35840,AT2G38240,AT1G17500,AT3G42860,AT4G27800,AT5G37600,AT1G64680,AT5G54130,AT1G07010,AT3G22370,AT3G51370,AT1G24620,AT4G04955,AT1G64060,AT4G32410,AT1G60950,AT2G41480,AT3G23660,AT5G64120,AT2G30490,AT4G33030,AT4G21990,AT3G47550,AT2G36530,AT5G13030,AT1G01040,AT1G77090,AT5G19420,AT5G49740,AT1G01050,AT5G67480,AT1G07810,AT5G35735,AT4G26270,AT2G47450,AT1G10630,AT3G21720,AT3G24430,AT3G15730,AT4G37870,AT5G57800,AT3G11470,AT3G55800,AT5G06720,AT5G42270 |
| GO:MF | transferase activity          | GO:0016740 | 0.02466591 | 1.60790279 | 3963 | 205 | 58 AT2G37050,AT1G69220,AT1G61700,AT5G04870,AT5G20350,AT4G29130,AT1G36370,AT1G72030,AT4G16600,AT5G56300,AT5G13930,AT1G56310,AT4G12570,AT2G22910,AT1G27680,AT5G18150,AT4G31390,AT1G49340,AT1G74960,AT1G78570,AT3G58690,AT2G38110,AT5G48300,AT3G19380,AT4G32410,AT4G30310,AT5G05700,AT2G17700,AT4G01210,AT2G39800,AT5G62220,AT1G31910,AT3G52090,AT4G33030,AT5G03860,AT5G13030,AT5G64940,AT5G48930,AT4G11350,AT1G32900,AT1G28440,AT1G62330,AT1G74380,AT3G54100,AT4G01370,AT4G26270,AT4G02280,AT1G64970,AT4G26850,AT1G54570,AT5G63930,AT4G37870,AT3G11470,AT2G21070,AT4G02500,AT5G53450,AT4G14680,AT5G13420 |

|       |                                                |            |            |            |       |     |     |                                                                                                                                                                                                                                                                                                                                                                                                                                                                                                                                                                                                                                                                                                                                                                                                                                                                                                                                                                                                                                                                                                                                                                                                                                                                                                                                                                                                                                                                                                                                                                                                                                                                                                                                                                                                                                                                |
|-------|------------------------------------------------|------------|------------|------------|-------|-----|-----|----------------------------------------------------------------------------------------------------------------------------------------------------------------------------------------------------------------------------------------------------------------------------------------------------------------------------------------------------------------------------------------------------------------------------------------------------------------------------------------------------------------------------------------------------------------------------------------------------------------------------------------------------------------------------------------------------------------------------------------------------------------------------------------------------------------------------------------------------------------------------------------------------------------------------------------------------------------------------------------------------------------------------------------------------------------------------------------------------------------------------------------------------------------------------------------------------------------------------------------------------------------------------------------------------------------------------------------------------------------------------------------------------------------------------------------------------------------------------------------------------------------------------------------------------------------------------------------------------------------------------------------------------------------------------------------------------------------------------------------------------------------------------------------------------------------------------------------------------------------|
| GO:BP | cellular process                               | GO:0009987 | 5.74640865 | 8.24060349 | 16591 | 190 | 179 | AT5G05340,AT5G48800,AT5G54510,AT2G37050,AT1G69220,AT1G661700,AT5G63190,AT4G37270,AT5G04870,AT5G20350,AT1G65930,AT4G29130,AT1G13440,AT5G04040,AT3G04090,AT1G36370,AT3G58670,AT1G72030,AT3G54940,AT5G56300,AT5G51070,AT5G39040,AT1G55480,AT5G02500,AT5G38200,AT5G13930,AT2G06990,AT1G56310,AT4G12570,AT3G27020,AT2G22910,AT2G34770,AT2G20630,AT2G35840,AT2G25800,AT1G27350,AT3G59340,AT2G37040,AT2G38240,AT2G22240,AT1G27680,AT1G17500,AT5G18150,AT4G31390,AT1G49340,AT4G27800,AT3G01510,AT5G23060,AT1G12360,AT4G27030,AT2G15890,AT1G07920,AT1G32500,AT5G37600,AT4G27410,AT2G47900,AT5G44730,AT2G19600,AT1G74960,AT1G78570,AT2G26080,AT3G58690,AT5G25400,AT3G22370,AT2G38110,AT3G51370,AT3G43540,AT5G48300,AT1G24620,AT3G19380,AT4G04955,AT1G64060,AT4G32410,AT1G60950,AT4G30310,AT5G05700,AT5G64260,AT1G69800,AT2G41480,AT3G02470,AT4G38030,AT2G17700,AT5G08650,AT3G23660,AT1G02520,AT3G61320,AT5G64120,AT2G39800,AT5G62220,AT1G30360,AT1G17840,AT2G30490,AT1G31910,AT5G33320,AT2G25490,AT3G52090,AT4G33030,AT2G47600,AT5G03860,AT4G21990,AT2G36530,AT1G68560,AT4G00680,AT1G01040,AT4G18360,AT4G20360,AT1G77090,AT5G03940,AT2G42600,AT3G29090,AT5G64940,AT5G48930,AT5G43430,AT5G49740,AT5G56320,AT1G32900,AT1G01050,AT1G28440,AT1G62330,AT1G28100,AT1G05940,AT5G67480,AT5G13650,AT4G30510,AT4G24040,AT2G22780,AT1G48130,AT1G07810,AT5G13630,AT1G74380,AT3G54100,AT4G01370,AT5G35735,AT2G28800,AT4G26270,AT5G19730,AT4G25130,AT4G02280,AT1G76690,AT2G47450,AT3G58140,AT3G03800,AT5G55180,AT1G54350,AT5G43350,AT1G10630,AT2G32810,AT1G64970,AT2G37970,AT3G21720,AT3G24430,AT5G41610,AT3G15730,AT5G22300,AT4G26850,AT1G54570,AT5G63930,AT4G37870,AT1G71790,AT1G75850,AT5G57800,AT3G11470,AT2G21070,AT3G52940,AT3G55800,AT2G38960,AT4G02500,AT4G04350,AT1G57590,AT5G06720,AT1G12110,AT5G53450,AT2G23810,AT4G14680,AT3G07720,AT3G29030,AT5G61380,AT5G42270,AT5G13420 |
| GO:BP | carbohydrate metabolic process                 | GO:0005975 | 1.42768137 | 7.84536870 | 1101  | 190 | 35  | AT5G20350,AT4G29130,AT1G13440,AT5G04040,AT2G35840,AT1G27680,AT3G01510,AT5G48300,AT4G32410,AT4G30310,AT1G69800,AT4G38030,AT5G62220,AT5G03860,AT2G36530,AT1G68560,AT3G29090,AT1G32900,AT1G01050,AT1G62330,AT4G24040,AT2G22780,AT1G74380,AT3G54100,AT4G26270,AT5G19730,AT4G02280,AT5G55180,AT2G32810,AT3G21720,AT4G26850,AT4G37870,AT3G55800,AT4G02500,AT5G13420                                                                                                                                                                                                                                                                                                                                                                                                                                                                                                                                                                                                                                                                                                                                                                                                                                                                                                                                                                                                                                                                                                                                                                                                                                                                                                                                                                                                                                                                                                  |
| GO:BP | generation of precursor metabolites and energy | GO:0006091 | 4.45170681 | 6.35147344 | 462   | 190 | 21  | AT1G65930,AT4G29130,AT1G13440,AT1G55480,AT1G27680,AT4G31390,AT4G27800,AT3G22370,AT5G48300,AT1G60950,AT3G61320,AT5G03860,AT2G36530,AT2G42600,AT5G43430,AT5G49740,AT2G22780,AT4G26270,AT3G21720,AT5G42270,AT5G13420                                                                                                                                                                                                                                                                                                                                                                                                                                                                                                                                                                                                                                                                                                                                                                                                                                                                                                                                                                                                                                                                                                                                                                                                                                                                                                                                                                                                                                                                                                                                                                                                                                              |
| GO:BP | small molecule metabolic process               | GO:0044281 | 0.00000642 | 5.19226597 | 1595  | 190 | 38  | AT1G65930,AT4G29130,AT1G13440,AT5G04040,AT1G36370,AT5G38200,AT2G22910,AT2G34770,AT2G37040,AT2G22240,AT4G27030,AT5G37600,AT1G74960,AT1G78570,AT2G26080,AT4G04955,AT2G39800,AT2G30490,AT1G31910,AT5G03860,AT4G21990,AT2G36530,AT5G43430,AT1G62330,AT2G22780,AT3G54100,AT4G26270,AT1G76690,AT1G64970,AT3G21720,AT3G15730,AT4G26850,AT1G54570,AT4G37870,AT3G11470,AT1G12110,AT3G07720,AT5G13420                                                                                                                                                                                                                                                                                                                                                                                                                                                                                                                                                                                                                                                                                                                                                                                                                                                                                                                                                                                                                                                                                                                                                                                                                                                                                                                                                                                                                                                                    |
| GO:BP | glucan metabolic process                       | GO:0044042 | 0.00005058 | 4.29598274 | 222   | 190 | 13  | AT5G20350,AT1G27680,AT3G01510,AT5G48300,AT4G32410,AT5G62220,AT1G68560,AT1G32900,AT1G01050,AT1G74380,AT4G02280,AT3G55800,AT4G02500                                                                                                                                                                                                                                                                                                                                                                                                                                                                                                                                                                                                                                                                                                                                                                                                                                                                                                                                                                                                                                                                                                                                                                                                                                                                                                                                                                                                                                                                                                                                                                                                                                                                                                                              |

|       |                              |            |            |            |      |     |    |                                                                                                                                                                                                                                                                                                                                                                                                                                                                                                                                                                                                                                                                                                                                                                                                                                                               |
|-------|------------------------------|------------|------------|------------|------|-----|----|---------------------------------------------------------------------------------------------------------------------------------------------------------------------------------------------------------------------------------------------------------------------------------------------------------------------------------------------------------------------------------------------------------------------------------------------------------------------------------------------------------------------------------------------------------------------------------------------------------------------------------------------------------------------------------------------------------------------------------------------------------------------------------------------------------------------------------------------------------------|
| GO:BP | response to abiotic stimulus | GO:0009628 | 0.00007154 | 4.14544869 | 2131 | 190 | 43 | AT5G63190,AT4G37270,AT1G13440,AT3G58670,AT1G55480,AT5G02500,AT5G13930,AT2G37040,AT4G31390,AT5G23060,AT2G15890,AT4G27410,AT2G47900,AT5G44730,AT1G74960,AT3G22370,AT5G48300,AT1G64060,AT4G32410,AT1G60950,AT5G64260,AT2G39800,AT1G17840,AT2G36530,AT5G13030,AT5G64940,AT5G67480,AT5G13650,AT1G48130,AT4G01370,AT5G35735,AT4G26270,AT4G25130,AT4G02280,AT2G47450,AT3G17020,AT2G37970,AT4G26850,AT1G71790,AT2G21070,AT1G12110,AT5G53450,AT5G42270                                                                                                                                                                                                                                                                                                                                                                                                                 |
| GO:BP | protein trimerization        | GO:0070206 | 0.00012493 | 3.90331984 | 7    | 190 | 4  | AT5G03940,AT2G28800,AT2G47450,AT4G14680                                                                                                                                                                                                                                                                                                                                                                                                                                                                                                                                                                                                                                                                                                                                                                                                                       |
| GO:BP | response to chemical         | GO:0042221 | 0.00016548 | 3.78123203 | 2940 | 190 | 52 | AT5G05340,AT5G54510,AT1G65930,AT4G29130,AT1G13440,AT1G36370,AT3G58670,AT5G39040,AT5G13930,AT4G12570,AT2G37040,AT4G35770,AT2G38240,AT2G22240,AT4G31390,AT5G23060,AT2G15890,AT4G27410,AT2G47900,AT5G44730,AT1G78570,AT1G64060,AT5G05700,AT5G64260,AT2G41480,AT5G13200,AT5G64120,AT2G39800,AT1G17840,AT2G25490,AT2G36530,AT1G68560,AT5G13030,AT5G64940,AT5G67480,AT5G13650,AT1G48130,AT1G07810,AT4G01370,AT5G35735,AT4G26270,AT4G25130,AT4G02280,AT3G15730,AT5G22300,AT4G26850,AT5G06720,AT1G12110,AT2G23810,AT3G07720,AT5G61380,AT5G13420                                                                                                                                                                                                                                                                                                                       |
| GO:BP | protein heterotrimerization  | GO:0070208 | 0.00042709 | 3.36947738 | 3    | 190 | 3  | AT5G03940,AT2G28800,AT2G47450                                                                                                                                                                                                                                                                                                                                                                                                                                                                                                                                                                                                                                                                                                                                                                                                                                 |
| GO:BP | response to stimulus         | GO:0050896 | 0.00061245 | 3.21292894 | 6001 | 190 | 83 | AT5G05340,AT5G54510,AT1G69220,AT5G63190,AT4G37270,AT1G65930,AT4G29130,AT1G13440,AT1G36370,AT3G58670,AT5G39040,AT1G55480,AT5G02500,AT5G13930,AT4G12570,AT1G27350,AT2G37040,AT4G35770,AT2G38240,AT2G22240,AT4G31390,AT1G49340,AT5G23060,AT2G15890,AT4G27410,AT2G47900,AT5G44730,AT1G74960,AT1G78570,AT3G22370,AT5G48300,AT3G19380,AT4G04955,AT1G64060,AT4G32410,AT1G60950,AT5G05700,AT5G64260,AT2G41480,AT5G13200,AT5G64120,AT2G39800,AT1G17840,AT2G25490,AT4G33030,AT2G36530,AT1G68560,AT5G13030,AT1G01040,AT4G18360,AT3G29090,AT5G64940,AT5G67480,AT5G13650,AT1G48130,AT1G07810,AT4G01370,AT5G35735,AT4G26270,AT5G06990,AT4G25130,AT4G02280,AT1G76690,AT2G47450,AT3G17020,AT5G43350,AT2G37970,AT3G15730,AT5G22300,AT4G26850,AT1G54570,AT4G37870,AT1G71790,AT2G21070,AT5G06720,AT1G12110,AT5G53450,AT2G23810,AT4G14680,AT3G07720,AT5G61380,AT5G42270,AT5G13420 |
| GO:BP | response to oxidative stress | GO:0006979 | 0.00068496 | 3.16433116 | 426  | 190 | 16 | AT5G05340,AT5G13930,AT4G12570,AT1G27350,AT2G37040,AT4G35770,AT4G31390,AT2G47900,AT2G41480,AT5G64120,AT2G39800,AT5G64940,AT5G67480,AT5G13650,AT4G25130,AT5G06720                                                                                                                                                                                                                                                                                                                                                                                                                                                                                                                                                                                                                                                                                               |
| GO:BP | response to stress           | GO:0006950 | 0.00090938 | 3.04125339 | 3733 | 190 | 59 | AT5G05340,AT1G69220,AT5G63190,AT1G65930,AT1G13440,AT3G58670,AT1G55480,AT5G02500,AT5G13930,AT4G12570,AT1G27350,AT2G37040,AT4G35770,AT2G38240,AT2G22240,AT4G31390,AT2G15890,AT4G27410,AT2G47900,AT5G44730,AT1G74960,AT3G22370,AT3G19380,AT4G04955,AT1G64060,AT4G32410,AT5G05700,AT5G64260,AT2G41480,AT5G64120,AT2G39800,AT1G17840,AT4G33030,AT2G36530,AT5G13030,AT1G01040,AT4G18360,AT3G29090,AT5G64940,AT5G67480,AT5G13650,AT1G48130,AT4G01370,AT5G35735,AT4G26270,AT4G25130,AT4G02280,AT1G76690,AT3G17020,AT5G43350,AT4G26850,AT1G54570,AT4G37870,AT1G71790,AT5G06720,AT2G21070,AT5G53450,AT2G23810,AT4G14680                                                                                                                                                                                                                                                 |

|       |                                                     |            |            |            |      |     |    |                                                                                                                                                                                                                                                                                                                                                                                   |
|-------|-----------------------------------------------------|------------|------------|------------|------|-----|----|-----------------------------------------------------------------------------------------------------------------------------------------------------------------------------------------------------------------------------------------------------------------------------------------------------------------------------------------------------------------------------------|
| GO:BP | oxoacid metabolic process                           | GO:0043436 | 0.00126231 | 2.89883099 | 1067 | 190 | 26 | AT1G65930,AT4G29130,AT1G13440,AT1G36370,AT5G38200,AT2G22910,AT2G34770,AT2G37040,AT4G27030,AT5G37600,AT1G74960,AT2G26080,AT2G39800,AT5G03860,AT4G21990,AT2G36530,AT5G43430,AT2G22780,AT4G26270,AT1G76690,AT3G21720,AT3G15730,AT4G26850,AT3G11470,AT1G12110,AT3G07720                                                                                                               |
| GO:BP | organic acid metabolic process                      | GO:0006082 | 0.00128418 | 2.89137197 | 1068 | 190 | 26 | AT1G65930,AT4G29130,AT1G13440,AT1G36370,AT5G38200,AT2G22910,AT2G34770,AT2G37040,AT4G27030,AT5G37600,AT1G74960,AT2G26080,AT2G39800,AT5G03860,AT4G21990,AT2G36530,AT5G43430,AT2G22780,AT4G26270,AT1G76690,AT3G21720,AT3G15730,AT4G26850,AT3G11470,AT1G12110,AT3G07720                                                                                                               |
| GO:BP | starch metabolic process                            | GO:0005982 | 0.00182385 | 2.73900889 | 71   | 190 | 7  | AT1G27680,AT3G01510,AT5G48300,AT1G32900,AT1G01050,AT4G02280,AT3G55800                                                                                                                                                                                                                                                                                                             |
| GO:BP | carboxylic acid metabolic process                   | GO:0019752 | 0.00192841 | 2.71479970 | 955  | 190 | 24 | AT1G65930,AT4G29130,AT1G13440,AT1G36370,AT5G38200,AT2G22910,AT2G34770,AT2G37040,AT4G27030,AT5G37600,AT1G74960,AT2G26080,AT2G39800,AT5G03860,AT4G21990,AT2G36530,AT5G43430,AT2G22780,AT4G26270,AT1G76690,AT3G21720,AT3G15730,AT4G26850,AT3G11470                                                                                                                                   |
| GO:BP | response to starvation                              | GO:0042594 | 0.00296034 | 2.52865791 | 182  | 190 | 10 | AT5G63190,AT2G22240,AT4G31390,AT4G04955,AT4G33030,AT5G64940,AT5G43350,AT1G54570,AT4G37870,AT4G14680                                                                                                                                                                                                                                                                               |
| GO:BP | catabolic process                                   | GO:0009056 | 0.00544374 | 2.26410223 | 1378 | 190 | 29 | AT5G05340,AT4G29130,AT1G13440,AT5G04040,AT2G06990,AT1G56310,AT2G37040,AT4G31390,AT3G01510,AT2G26080,AT4G04955,AT5G05700,AT2G41480,AT5G64120,AT2G25490,AT2G36530,AT1G68560,AT1G01040,AT3G29090,AT5G43430,AT4G30510,AT4G24040,AT2G22780,AT4G26270,AT5G19730,AT3G15730,AT5G06720,AT3G07720,AT5G42270                                                                                 |
| GO:BP | protein heterooligomerization                       | GO:0051291 | 0.00837902 | 2.07680630 | 6    | 190 | 3  | AT5G03940,AT2G28800,AT2G47450                                                                                                                                                                                                                                                                                                                                                     |
| GO:BP | polysaccharide metabolic process                    | GO:0005976 | 0.00889784 | 2.05071493 | 463  | 190 | 15 | AT5G20350,AT1G27680,AT3G01510,AT5G48300,AT4G32410,AT5G62220,AT1G68560,AT3G29090,AT1G32900,AT1G01050,AT1G74380,AT5G19730,AT4G02280,AT3G55800,AT4G02500                                                                                                                                                                                                                             |
| GO:BP | energy derivation by oxidation of organic compounds | GO:0015980 | 0.01423794 | 1.84655266 | 133  | 190 | 8  | AT1G65930,AT1G27680,AT3G22370,AT5G48300,AT5G03860,AT2G42600,AT2G22780,AT3G21720                                                                                                                                                                                                                                                                                                   |
| GO:BP | glyoxylate cycle                                    | GO:0006097 | 0.01456960 | 1.83655235 | 7    | 190 | 3  | AT5G03860,AT2G22780,AT3G21720                                                                                                                                                                                                                                                                                                                                                     |
| GO:BP | system development                                  | GO:0048731 | 0.01804098 | 1.74373986 | 2117 | 190 | 37 | AT5G04870,AT4G29130,AT2G06990,AT4G12570,AT2G22240,AT1G49340,AT2G15890,AT1G32500,AT5G37600,AT4G27410,AT1G74960,AT2G38110,AT5G48300,AT1G24620,AT5G05700,AT3G02470,AT5G13200,AT2G39800,AT1G17840,AT1G01040,AT4G20360,AT2G42600,AT5G64940,AT5G56320,AT1G28440,AT1G48130,AT1G74380,AT4G26270,AT4G02280,AT3G15730,AT1G54570,AT2G21070,AT4G04350,AT5G06720,AT1G12110,AT3G29030,AT5G61380 |
| GO:BP | small molecule biosynthetic process                 | GO:0044283 | 0.02076179 | 1.68273517 | 686  | 190 | 18 | AT1G13440,AT1G36370,AT2G22910,AT2G34770,AT2G37040,AT2G22240,AT4G27030,AT5G37600,AT1G74960,AT2G39800,AT2G30490,AT4G21990,AT1G76690,AT1G64970,AT4G26850,AT1G54570,AT4G37870,AT3G11470                                                                                                                                                                                               |
| GO:BP | carbohydrate biosynthetic process                   | GO:0016051 | 0.02257615 | 1.64635004 | 331  | 190 | 12 | AT5G20350,AT1G13440,AT2G35840,AT1G27680,AT5G48300,AT4G32410,AT5G62220,AT1G32900,AT4G26850,AT4G37870,AT3G55800,AT4G02500                                                                                                                                                                                                                                                           |
| GO:BP | response to nutrient levels                         | GO:0031667 | 0.02268265 | 1.64430610 | 230  | 190 | 10 | AT5G63190,AT2G22240,AT4G31390,AT4G04955,AT4G33030,AT5G64940,AT5G43350,AT1G54570,AT4G37870,AT4G14680                                                                                                                                                                                                                                                                               |
| GO:BP | glyoxylate metabolic process                        | GO:0046487 | 0.02316245 | 1.63521537 | 8    | 190 | 3  | AT5G03860,AT2G22780,AT3G21720                                                                                                                                                                                                                                                                                                                                                     |
| GO:BP | cellular response to starvation                     | GO:0009267 | 0.02399031 | 1.61996405 | 143  | 190 | 8  | AT2G22240,AT4G31390,AT4G04955,AT4G33030,AT5G43350,AT1G54570,AT4G37870,AT4G14680                                                                                                                                                                                                                                                                                                   |

|       |                                      |            |            |            |      |     |                                                                                                                                                                                                                                                                                                                                                                                                                                                                                                                                                                                                                                                                                                                                                                                                                                                                                                                                                                                                                                                                                                                                                                                                                                                                                                                                                                                                                                                                                                                                                                                                                                                                               |
|-------|--------------------------------------|------------|------------|------------|------|-----|-------------------------------------------------------------------------------------------------------------------------------------------------------------------------------------------------------------------------------------------------------------------------------------------------------------------------------------------------------------------------------------------------------------------------------------------------------------------------------------------------------------------------------------------------------------------------------------------------------------------------------------------------------------------------------------------------------------------------------------------------------------------------------------------------------------------------------------------------------------------------------------------------------------------------------------------------------------------------------------------------------------------------------------------------------------------------------------------------------------------------------------------------------------------------------------------------------------------------------------------------------------------------------------------------------------------------------------------------------------------------------------------------------------------------------------------------------------------------------------------------------------------------------------------------------------------------------------------------------------------------------------------------------------------------------|
| GO:BP | photosynthesis                       | GO:0015979 | 0.02410275 | 1.61793335 | 281  | 190 | 11 AT1G55480,AT4G31390,AT4G27800,AT1G60950,AT3G61320,AT1G77090,AT2G42600,AT5G49740,AT5G13630,AT3G55800,AT5G42270                                                                                                                                                                                                                                                                                                                                                                                                                                                                                                                                                                                                                                                                                                                                                                                                                                                                                                                                                                                                                                                                                                                                                                                                                                                                                                                                                                                                                                                                                                                                                              |
| GO:BP | lignin metabolic process             | GO:0009808 | 0.03198179 | 1.49509717 | 75   | 190 | 6 AT5G05340,AT2G37040,AT5G64120,AT2G30490,AT5G48930,AT5G13420                                                                                                                                                                                                                                                                                                                                                                                                                                                                                                                                                                                                                                                                                                                                                                                                                                                                                                                                                                                                                                                                                                                                                                                                                                                                                                                                                                                                                                                                                                                                                                                                                 |
| GO:BP | multicellular organism development   | GO:0007275 | 0.03777869 | 1.42275304 | 2715 | 190 | 43 AT5G04870,AT4G29130,AT5G02500,AT2G06990,AT4G12570,AT2G37040,AT2G22240,AT1G49340,AT5G23060,AT2G15890,AT1G32500,AT5G37600,AT4G27410,AT1G74960,AT2G38110,AT5G48300,AT1G24620,AT5G05700,AT3G02470,AT5G13200,AT2G39800,AT1G17840,AT2G30490,AT1G01040,AT4G20360,AT2G42600,AT5G64940,AT5G56320,AT1G28440,AT1G48130,AT1G74380,AT4G01370,AT4G26270,AT4G02280,AT3G15730,AT1G54570,AT5G57800,AT2G21070,AT4G04350,AT5G06720,AT1G12110,AT3G29030,AT5G61380                                                                                                                                                                                                                                                                                                                                                                                                                                                                                                                                                                                                                                                                                                                                                                                                                                                                                                                                                                                                                                                                                                                                                                                                                              |
| GO:BP | cellular response to nutrient levels | GO:0031669 | 0.04865378 | 1.31288335 | 158  | 190 | 8 AT2G22240,AT4G31390,AT4G04955,AT4G33030,AT5G43350,AT1G54570,AT4G37870,AT4G14680                                                                                                                                                                                                                                                                                                                                                                                                                                                                                                                                                                                                                                                                                                                                                                                                                                                                                                                                                                                                                                                                                                                                                                                                                                                                                                                                                                                                                                                                                                                                                                                             |
| GO:CC | cytoplasm                            | GO:0005737 | 3.81986458 | 17.4179520 | 9524 | 204 | 161 AT5G05340,AT5G54510,AT2G37050,AT1G69220,AT5G63190,AT4G37270,AT5G04870,AT5G20350,AT1G65930,AT4G29130,AT1G13440,AT5G04040,AT3G04090,AT1G36370,AT3G58670,AT1G72030,AT1G50450,AT5G51070,AT5G39040,AT1G55480,AT5G02500,AT5G13930,AT1G56310,AT4G12570,AT3G27020,AT2G22910,AT2G34770,AT5G17170,AT2G20630,AT2G35840,AT1G27350,AT2G37040,AT4G35770,AT2G38240,AT2G22240,AT1G27680,AT1G17500,AT5G30510,AT4G31390,AT1G49340,AT4G27800,AT3G01510,AT5G23060,AT1G12360,AT4G27030,AT2G15890,AT1G07920,AT1G32500,AT5G37600,AT2G47900,AT1G64680,AT1G47640,AT2G19600,AT1G74960,AT1G78570,AT2G26080,AT1G07010,AT5G25400,AT3G22370,AT5G59840,AT1G62780,AT3G43540,AT5G48300,AT1G24620,AT4G04955,AT3G22850,AT4G32410,AT1G60950,AT4G30310,AT5G64260,AT1G69800,AT2G17700,AT5G08650,AT4G01210,AT5G13200,AT3G23660,AT3G61320,AT5G64120,AT2G39800,AT5G62220,AT1G30360,AT2G30490,AT1G31910,AT5G33320,AT2G25490,AT4G33030,AT3G53950,AT2G47600,AT5G03860,AT4G21990,AT3G47550,AT2G36530,AT1G68560,AT5G13030,AT4G00680,AT1G52510,AT1G01040,AT4G18360,AT4G20360,AT1G77090,AT5G03940,AT2G42600,AT5G64940,AT5G48930,AT5G43430,AT5G49740,AT1G32900,AT1G01050,AT1G62330,AT1G05940,AT4G36530,AT5G67480,AT5G13650,AT4G30510,AT2G22780,AT1G48130,AT1G07810,AT5G13630,AT1G74380,AT4G01370,AT2G28800,AT4G26270,AT5G19730,AT4G25130,AT1G76690,AT2G47450,AT3G58140,AT3G17020,AT5G62740,AT3G06610,AT1G54350,AT1G10630,AT2G32810,AT1G64970,AT2G37970,AT3G21720,AT3G24430,AT5G41610,AT3G15730,AT5G22300,AT4G26850,AT1G54570,AT1G44920,AT4G37870,AT1G71790,AT1G75850,AT5G57800,AT3G11470,AT3G55800,AT2G38960,AT4G02500,AT4G04350,AT5G06720,AT5G53450,AT2G23810,AT2G31670,AT4G14680,AT3G07720,AT5G42270,AT2G24270,AT5G13420 |

|       |                    |            |            |            |      |     |                                                                                                                                                                                                                                                                                                                                                                                                                                                                                                                                                                                                                                                                                                                                                                                                                          |
|-------|--------------------|------------|------------|------------|------|-----|--------------------------------------------------------------------------------------------------------------------------------------------------------------------------------------------------------------------------------------------------------------------------------------------------------------------------------------------------------------------------------------------------------------------------------------------------------------------------------------------------------------------------------------------------------------------------------------------------------------------------------------------------------------------------------------------------------------------------------------------------------------------------------------------------------------------------|
| GO:CC | plastid            | GO:0009536 | 6.86211643 | 15.1635419 | 2856 | 204 | 79 AT4G37270,AT1G65930,AT1G13440,AT1G72030,AT1G50450,AT5G51070,AT5G39040,AT1G55480,AT5G02500,AT3G27020,AT2G22910,AT5G17170,AT4G35770,AT1G27680,AT5G30510,AT4G31390,AT4G27800,AT3G01510,AT5G23060,AT4G27030,AT2G15890,AT1G07920,AT1G32500,AT5G37600,AT2G47900,AT1G64680,AT1G74960,AT2G26080,AT1G07010,AT3G22370,AT5G59840,AT1G62780,AT3G43540,AT5G48300,AT1G60950,AT4G30310,AT5G64260,AT5G08650,AT5G13200,AT3G61320,AT2G39800,AT1G30360,AT5G33320,AT4G33030,AT4G21990,AT2G36530,AT5G13030,AT1G52510,AT4G20360,AT1G77090,AT5G03940,AT2G42600,AT5G64940,AT5G43430,AT5G49740,AT1G32900,AT1G05940,AT4G36530,AT5G13650,AT2G22780,AT5G13630,AT2G28800,AT4G25130,AT2G47450,AT3G58140,AT5G62740,AT1G54350,AT1G64970,AT3G24430,AT3G15730,AT1G54570,AT1G44920,AT3G55800,AT4G04350,AT5G53450,AT2G31670,AT4G14680,AT5G42270,AT5G13420 |
| GO:CC | chloroplast        | GO:0009507 | 2.89776394 | 14.5379369 | 2351 | 204 | 70 AT4G37270,AT1G65930,AT1G13440,AT1G72030,AT1G50450,AT5G51070,AT1G55480,AT5G02500,AT2G22910,AT5G17170,AT4G35770,AT1G27680,AT5G30510,AT4G31390,AT4G27800,AT3G01510,AT5G23060,AT4G27030,AT2G15890,AT1G07920,AT1G32500,AT1G64680,AT1G74960,AT2G26080,AT1G07010,AT3G22370,AT1G62780,AT3G43540,AT5G48300,AT1G60950,AT4G30310,AT5G08650,AT3G61320,AT2G39800,AT1G30360,AT5G33320,AT4G33030,AT4G21990,AT2G36530,AT5G13030,AT1G52510,AT4G20360,AT1G77090,AT5G03940,AT2G42600,AT5G64940,AT5G49740,AT1G32900,AT1G05940,AT4G36530,AT5G13650,AT2G22780,AT5G13630,AT2G28800,AT4G25130,AT2G47450,AT3G58140,AT1G54350,AT1G64970,AT3G24430,AT3G15730,AT1G54570,AT1G44920,AT3G55800,AT4G04350,AT5G53450,AT2G31670,AT4G14680,AT5G42270,AT5G13420                                                                                           |
| GO:CC | chloroplast stroma | GO:0009570 | 1.57351562 | 6.80312893 | 762  | 204 | 29 AT1G65930,AT5G51070,AT1G55480,AT5G30510,AT4G31390,AT4G27800,AT3G01510,AT1G32500,AT1G74960,AT1G62780,AT5G48300,AT3G61320,AT5G13030,AT1G52510,AT4G20360,AT1G77090,AT5G03940,AT5G13650,AT5G13630,AT4G25130,AT2G47450,AT3G58140,AT3G24430,AT1G54570,AT3G55800,AT4G04350,AT2G31670,AT4G14680,AT5G13420                                                                                                                                                                                                                                                                                                                                                                                                                                                                                                                     |
| GO:CC | plastid stroma     | GO:0009532 | 1.93940830 | 6.71233074 | 769  | 204 | 29 AT1G65930,AT5G51070,AT1G55480,AT5G30510,AT4G31390,AT4G27800,AT3G01510,AT1G32500,AT1G74960,AT1G62780,AT5G48300,AT3G61320,AT5G13030,AT1G52510,AT4G20360,AT1G77090,AT5G03940,AT5G13650,AT5G13630,AT4G25130,AT2G47450,AT3G58140,AT3G24430,AT1G54570,AT3G55800,AT4G04350,AT2G31670,AT4G14680,AT5G13420                                                                                                                                                                                                                                                                                                                                                                                                                                                                                                                     |

|       |                                    |            |            |            |       |     |     |                                                                                                                                                                                                                                                                                                                                                                                                                                                                                                                                                                                                                                                                                                                                                                                                                                                                                                                                                                                                                                                                                                                                                                                                                                                                                                                                                                                                                                                                                                                                                                                                                                                                                                                                                           |
|-------|------------------------------------|------------|------------|------------|-------|-----|-----|-----------------------------------------------------------------------------------------------------------------------------------------------------------------------------------------------------------------------------------------------------------------------------------------------------------------------------------------------------------------------------------------------------------------------------------------------------------------------------------------------------------------------------------------------------------------------------------------------------------------------------------------------------------------------------------------------------------------------------------------------------------------------------------------------------------------------------------------------------------------------------------------------------------------------------------------------------------------------------------------------------------------------------------------------------------------------------------------------------------------------------------------------------------------------------------------------------------------------------------------------------------------------------------------------------------------------------------------------------------------------------------------------------------------------------------------------------------------------------------------------------------------------------------------------------------------------------------------------------------------------------------------------------------------------------------------------------------------------------------------------------------|
| GO:CC | intracellular anatomical structure | GO:0005622 | 0.00007860 | 4.10456465 | 13505 | 204 | 169 | AT5G05340,AT5G54510,AT2G37050,AT1G69220,AT1G61700,AT5G63190,AT4G37270,AT5G04870,AT5G20350,AT1G65930,AT4G29130,AT1G13440,AT5G04040,AT3G04090,AT1G36370,AT3G58670,AT1G72030,AT1G50450,AT5G51070,AT5G39040,AT1G55480,AT5G02500,AT5G13930,AT2G06990,AT1G56310,AT4G12570,AT3G27020,AT2G22910,AT2G34770,AT5G17170,AT2G20630,AT2G35840,AT1G27350,AT2G37040,AT4G35770,AT2G38240,AT2G22240,AT1G27680,AT1G17500,AT5G30510,AT4G31390,AT1G49340,AT4G27800,AT3G01510,AT5G23060,AT1G12360,AT4G27030,AT2G15890,AT1G07920,AT1G32500,AT5G37600,AT4G27410,AT2G47900,AT1G64680,AT1G47640,AT2G19600,AT1G74960,AT1G78570,AT2G26080,AT1G07010,AT5G25400,AT3G22370,AT5G59840,AT1G62780,AT3G43540,AT5G48300,AT1G24620,AT4G04955,AT3G22850,AT4G32410,AT1G60950,AT4G30310,AT5G64260,AT1G69800,AT2G17700,AT5G08650,AT4G01210,AT5G13200,AT3G23660,AT3G61320,AT5G64120,AT2G39800,AT5G62220,AT1G30360,AT1G17840,AT2G30490,AT1G31910,AT5G33320,AT2G25490,AT3G52090,AT4G33030,AT3G53950,AT2G47600,AT5G03860,AT4G21990,AT3G47550,AT2G36530,AT1G68560,AT5G13030,AT4G00680,AT1G52510,AT1G01040,AT4G18360,AT4G20360,AT1G77090,AT5G03940,AT2G42600,AT5G64940,AT5G48930,AT5G43430,AT5G49740,AT1G32900,AT1G01050,AT1G62330,AT1G05940,AT4G36530,AT5G67480,AT5G13650,AT4G30510,AT2G22780,AT1G48130,AT1G07810,AT5G13630,AT1G74380,AT4G01370,AT2G28800,AT4G26270,AT5G19730,AT3G10530,AT4G25130,AT1G76690,AT2G47450,AT3G58140,AT3G17020,AT5G62740,AT3G06610,AT1G54350,AT1G10630,AT2G32810,AT1G64970,AT2G37970,AT3G21720,AT3G24430,AT5G41610,AT3G15730,AT5G22300,AT4G26850,AT1G54570,AT1G44920,AT4G37870,AT1G71790,AT1G75850,AT5G57800,AT3G11470,AT2G21070,AT3G55800,AT2G38960,AT4G02500,AT4G04350,AT5G06720,AT5G53450,AT2G23810,AT2G31670,AT4G14680,AT3G07720,AT5G61380,AT5G42270,AT2G24270,AT5G13420 |
|-------|------------------------------------|------------|------------|------------|-------|-----|-----|-----------------------------------------------------------------------------------------------------------------------------------------------------------------------------------------------------------------------------------------------------------------------------------------------------------------------------------------------------------------------------------------------------------------------------------------------------------------------------------------------------------------------------------------------------------------------------------------------------------------------------------------------------------------------------------------------------------------------------------------------------------------------------------------------------------------------------------------------------------------------------------------------------------------------------------------------------------------------------------------------------------------------------------------------------------------------------------------------------------------------------------------------------------------------------------------------------------------------------------------------------------------------------------------------------------------------------------------------------------------------------------------------------------------------------------------------------------------------------------------------------------------------------------------------------------------------------------------------------------------------------------------------------------------------------------------------------------------------------------------------------------|

|       |                                          |            |            |            |       |     |     |                                                                                                                                                                                                                                                                                                                                                                                                                                                                                                                                                                                                                                                                                                                                                                                                                                                                                                                                                                                                                                                                                                                                                                                                                                                                                                                                                                                                                                                                                                                                                                                  |
|-------|------------------------------------------|------------|------------|------------|-------|-----|-----|----------------------------------------------------------------------------------------------------------------------------------------------------------------------------------------------------------------------------------------------------------------------------------------------------------------------------------------------------------------------------------------------------------------------------------------------------------------------------------------------------------------------------------------------------------------------------------------------------------------------------------------------------------------------------------------------------------------------------------------------------------------------------------------------------------------------------------------------------------------------------------------------------------------------------------------------------------------------------------------------------------------------------------------------------------------------------------------------------------------------------------------------------------------------------------------------------------------------------------------------------------------------------------------------------------------------------------------------------------------------------------------------------------------------------------------------------------------------------------------------------------------------------------------------------------------------------------|
| GO:CC | intracellular membrane-bounded organelle | GO:0043231 | 0.00035691 | 3.44743663 | 11808 | 204 | 152 | AT5G05340,AT2G37050,AT1G69220,AT1G61700,AT5G63190,AT4G37270,AT5G04870,AT5G20350,AT1G65930,AT4G29130,AT1G13440,AT5G04040,AT3G04090,AT1G36370,AT3G58670,AT1G72030,AT1G50450,AT5G51070,AT5G39040,AT1G55480,AT5G02500,AT5G13930,AT2G06990,AT3G27020,AT2G22910,AT2G34770,AT5G17170,AT2G20630,AT2G35840,AT1G27350,AT4G35770,AT1G27680,AT1G17500,AT5G30510,AT4G31390,AT1G49340,AT4G27800,AT3G01510,AT5G23060,AT1G12360,AT4G27030,AT2G15890,AT1G07920,AT1G32500,AT5G37600,AT4G27410,AT2G47900,AT1G664680,AT1G47640,AT2G19600,AT1G74960,AT1G78570,AT2G26080,AT1G07010,AT5G25400,AT3G22370,AT5G59840,AT1G62780,AT3G43540,AT5G48300,AT1G24620,AT4G04955,AT4G32410,AT1G60950,AT4G30310,AT5G64260,AT1G69800,AT5G08650,AT4G01210,AT5G13200,AT3G23660,AT3G61320,AT5G64120,AT2G39800,AT5G62220,AT1G30360,AT1G17840,AT2G30490,AT1G31910,AT5G33320,AT2G25490,AT3G52090,AT4G33030,AT2G47600,AT5G03860,AT4G21990,AT3G47550,AT2G36530,AT1G68560,AT5G13030,AT1G52510,AT1G01040,AT4G18360,AT4G20360,AT1G77090,AT5G03940,AT2G42600,AT5G64940,AT5G43430,AT5G49740,AT1G32900,AT1G01050,AT1G62330,AT1G05940,AT4G36530,AT5G67480,AT5G13650,AT4G30510,AT2G22780,AT1G48130,AT1G07810,AT5G13630,AT1G74380,AT4G01370,AT2G28800,AT3G10530,AT4G25130,AT1G76690,AT2G47450,AT3G58140,AT5G62740,AT1G54350,AT1G10630,AT2G32810,AT1G64970,AT2G37970,AT3G21720,AT3G24430,AT5G41610,AT3G15730,AT4G26850,AT1G54570,AT1G44920,AT4G37870,AT1G75850,AT5G57800,AT3G11470,AT2G21070,AT3G55800,AT2G38960,AT4G02500,AT4G04350,AT5G06720,AT5G53450,AT2G23810,AT2G31670,AT4G14680,AT3G07720,AT5G61380,AT5G42270,AT2G24270,AT5G13420 |
|-------|------------------------------------------|------------|------------|------------|-------|-----|-----|----------------------------------------------------------------------------------------------------------------------------------------------------------------------------------------------------------------------------------------------------------------------------------------------------------------------------------------------------------------------------------------------------------------------------------------------------------------------------------------------------------------------------------------------------------------------------------------------------------------------------------------------------------------------------------------------------------------------------------------------------------------------------------------------------------------------------------------------------------------------------------------------------------------------------------------------------------------------------------------------------------------------------------------------------------------------------------------------------------------------------------------------------------------------------------------------------------------------------------------------------------------------------------------------------------------------------------------------------------------------------------------------------------------------------------------------------------------------------------------------------------------------------------------------------------------------------------|

|       |                            |            |            |            |       |     |     |                                                                                                                                                                                                                                                                                                                                                                                                                                                                                                                                                                                                                                                                                                                                                                                                                                                                                                                                                                                                                                                                                                                                                                                                                                                                                                                                                                                                                                                                                                                                                                                  |
|-------|----------------------------|------------|------------|------------|-------|-----|-----|----------------------------------------------------------------------------------------------------------------------------------------------------------------------------------------------------------------------------------------------------------------------------------------------------------------------------------------------------------------------------------------------------------------------------------------------------------------------------------------------------------------------------------------------------------------------------------------------------------------------------------------------------------------------------------------------------------------------------------------------------------------------------------------------------------------------------------------------------------------------------------------------------------------------------------------------------------------------------------------------------------------------------------------------------------------------------------------------------------------------------------------------------------------------------------------------------------------------------------------------------------------------------------------------------------------------------------------------------------------------------------------------------------------------------------------------------------------------------------------------------------------------------------------------------------------------------------|
| GO:CC | membrane-bounded organelle | GO:0043227 | 0.00039510 | 3.40328475 | 11823 | 204 | 152 | AT5G05340,AT2G37050,AT1G69220,AT1G61700,AT5G63190,AT4G37270,AT5G04870,AT5G20350,AT1G65930,AT4G29130,AT1G13440,AT5G04040,AT3G04090,AT1G36370,AT3G58670,AT1G72030,AT1G50450,AT5G51070,AT5G39040,AT1G55480,AT5G02500,AT5G13930,AT2G06990,AT3G27020,AT2G22910,AT2G34770,AT5G17170,AT2G20630,AT2G35840,AT1G27350,AT4G35770,AT1G27680,AT1G17500,AT5G30510,AT4G31390,AT1G49340,AT4G27800,AT3G01510,AT5G23060,AT1G12360,AT4G27030,AT2G15890,AT1G07920,AT1G32500,AT5G37600,AT4G27410,AT2G47900,AT1G664680,AT1G47640,AT2G19600,AT1G74960,AT1G78570,AT2G26080,AT1G07010,AT5G25400,AT3G22370,AT5G59840,AT1G62780,AT3G43540,AT5G48300,AT1G24620,AT4G04955,AT4G32410,AT1G60950,AT4G30310,AT5G64260,AT1G69800,AT5G08650,AT4G01210,AT5G13200,AT3G23660,AT3G61320,AT5G64120,AT2G39800,AT5G62220,AT1G30360,AT1G17840,AT2G30490,AT1G31910,AT5G33320,AT2G25490,AT3G52090,AT4G33030,AT2G47600,AT5G03860,AT4G21990,AT3G47550,AT2G36530,AT1G68560,AT5G13030,AT1G52510,AT1G01040,AT4G18360,AT4G20360,AT1G77090,AT5G03940,AT2G42600,AT5G64940,AT5G43430,AT5G49740,AT1G32900,AT1G01050,AT1G62330,AT1G05940,AT4G36530,AT5G67480,AT5G13650,AT4G30510,AT2G22780,AT1G48130,AT1G07810,AT5G13630,AT1G74380,AT4G01370,AT2G28800,AT3G10530,AT4G25130,AT1G76690,AT2G47450,AT3G58140,AT5G62740,AT1G54350,AT1G10630,AT2G32810,AT1G64970,AT2G37970,AT3G21720,AT3G24430,AT5G41610,AT3G15730,AT4G26850,AT1G54570,AT1G44920,AT4G37870,AT1G75850,AT5G57800,AT3G11470,AT2G21070,AT3G55800,AT2G38960,AT4G02500,AT4G04350,AT5G06720,AT5G53450,AT2G23810,AT2G31670,AT4G14680,AT3G07720,AT5G61380,AT5G42270,AT2G24270,AT5G13420 |
|-------|----------------------------|------------|------------|------------|-------|-----|-----|----------------------------------------------------------------------------------------------------------------------------------------------------------------------------------------------------------------------------------------------------------------------------------------------------------------------------------------------------------------------------------------------------------------------------------------------------------------------------------------------------------------------------------------------------------------------------------------------------------------------------------------------------------------------------------------------------------------------------------------------------------------------------------------------------------------------------------------------------------------------------------------------------------------------------------------------------------------------------------------------------------------------------------------------------------------------------------------------------------------------------------------------------------------------------------------------------------------------------------------------------------------------------------------------------------------------------------------------------------------------------------------------------------------------------------------------------------------------------------------------------------------------------------------------------------------------------------|

|       |                         |            |            |            |       |     |     |                                                                                                                                                                                                                                                                                                                                                                                                                                                                                                                                                                                                                                                                                                                                                                                                                                                                                                                                                                                                                                                                                                                                                                                                                                                                                                                                                                                                                                                                                                                                                                                                               |
|-------|-------------------------|------------|------------|------------|-------|-----|-----|---------------------------------------------------------------------------------------------------------------------------------------------------------------------------------------------------------------------------------------------------------------------------------------------------------------------------------------------------------------------------------------------------------------------------------------------------------------------------------------------------------------------------------------------------------------------------------------------------------------------------------------------------------------------------------------------------------------------------------------------------------------------------------------------------------------------------------------------------------------------------------------------------------------------------------------------------------------------------------------------------------------------------------------------------------------------------------------------------------------------------------------------------------------------------------------------------------------------------------------------------------------------------------------------------------------------------------------------------------------------------------------------------------------------------------------------------------------------------------------------------------------------------------------------------------------------------------------------------------------|
| GO:CC | intracellular organelle | GO:0043229 | 0.00116531 | 2.93355501 | 12312 | 204 | 155 | AT5G05340,AT2G37050,AT1G69220,AT1G61700,AT5G63190,AT4G37270,AT5G04870,AT5G20350,AT1G65930,AT4G29130,AT1G13440,AT5G04040,AT3G04090,AT1G36370,AT3G58670,AT1G72030,AT1G50450,AT5G51070,AT5G39040,AT1G55480,AT5G02500,AT5G13930,AT2G06990,AT1G56310,AT3G27020,AT2G22910,AT2G34770,AT5G17170,AT2G20630,AT2G35840,AT1G27350,AT4G35770,AT1G27680,AT1G17500,AT5G30510,AT4G31390,AT1G49340,AT4G27800,AT3G01510,AT5G23060,AT1G12360,AT4G27030,AT2G15890,AT1G07920,AT1G32500,AT5G37600,AT4G27410,AT2G47900,AT1G64680,AT1G47640,AT2G19600,AT1G74960,AT1G78570,AT2G26080,AT1G07010,AT5G25400,AT3G22370,AT5G59840,AT1G62780,AT3G43540,AT5G48300,AT1G24620,AT4G04955,AT4G32410,AT1G60950,AT4G30310,AT5G64260,AT1G69800,AT5G08650,AT4G01210,AT5G13200,AT3G23660,AT3G61320,AT5G64120,AT2G39800,AT5G62220,AT1G30360,AT1G17840,AT2G30490,AT1G31910,AT5G33320,AT2G25490,AT3G52090,AT4G33030,AT2G47600,AT5G03860,AT4G21990,AT3G47550,AT2G36530,AT1G68560,AT5G13030,AT4G00680,AT1G52510,AT1G01040,AT4G18360,AT4G20360,AT1G77090,AT5G03940,AT2G42600,AT5G64940,AT5G43430,AT5G49740,AT1G32900,AT1G01050,AT1G62330,AT1G05940,AT4G36530,AT5G67480,AT5G13650,AT4G30510,AT2G22780,AT1G48130,AT1G07810,AT5G13630,AT1G74380,AT4G01370,AT2G28800,AT3G10530,AT4G25130,AT1G76690,AT2G47450,AT3G58140,AT5G62740,AT1G54350,AT1G10630,AT2G32810,AT1G64970,AT2G37970,AT3G21720,AT3G24430,AT5G41610,AT3G15730,AT4G26850,AT1G54570,AT1G44920,AT4G37870,AT1G71790,AT1G75850,AT5G57800,AT3G11470,AT2G21070,AT3G55800,AT2G38960,AT4G02500,AT4G04350,AT5G06720,AT5G53450,AT2G23810,AT2G31670,AT4G14680,AT3G07720,AT5G61380,AT5G42270,AT2G24270,AT5G13420 |
|-------|-------------------------|------------|------------|------------|-------|-----|-----|---------------------------------------------------------------------------------------------------------------------------------------------------------------------------------------------------------------------------------------------------------------------------------------------------------------------------------------------------------------------------------------------------------------------------------------------------------------------------------------------------------------------------------------------------------------------------------------------------------------------------------------------------------------------------------------------------------------------------------------------------------------------------------------------------------------------------------------------------------------------------------------------------------------------------------------------------------------------------------------------------------------------------------------------------------------------------------------------------------------------------------------------------------------------------------------------------------------------------------------------------------------------------------------------------------------------------------------------------------------------------------------------------------------------------------------------------------------------------------------------------------------------------------------------------------------------------------------------------------------|

|       |                      |            |            |            |       |     |     |                                                                                                                                                                                                                                                                                                                                                                                                                                                                                                                                                                                                                                                                                                                                                                                                                                                                                                                                                                                                                                                                                                                                                                                                                                                                                                                                                                                                                                                                                                                                                                                                               |
|-------|----------------------|------------|------------|------------|-------|-----|-----|---------------------------------------------------------------------------------------------------------------------------------------------------------------------------------------------------------------------------------------------------------------------------------------------------------------------------------------------------------------------------------------------------------------------------------------------------------------------------------------------------------------------------------------------------------------------------------------------------------------------------------------------------------------------------------------------------------------------------------------------------------------------------------------------------------------------------------------------------------------------------------------------------------------------------------------------------------------------------------------------------------------------------------------------------------------------------------------------------------------------------------------------------------------------------------------------------------------------------------------------------------------------------------------------------------------------------------------------------------------------------------------------------------------------------------------------------------------------------------------------------------------------------------------------------------------------------------------------------------------|
| GO:CC | organelle            | GO:0043226 | 0.00127596 | 2.89416046 | 12326 | 204 | 155 | AT5G05340,AT2G37050,AT1G69220,AT1G61700,AT5G63190,AT4G37270,AT5G04870,AT5G20350,AT1G65930,AT4G29130,AT1G13440,AT5G04040,AT3G04090,AT1G36370,AT3G58670,AT1G72030,AT1G50450,AT5G51070,AT5G39040,AT1G55480,AT5G02500,AT5G13930,AT2G06990,AT1G56310,AT3G27020,AT2G22910,AT2G34770,AT5G17170,AT2G20630,AT2G35840,AT1G27350,AT4G35770,AT1G27680,AT1G17500,AT5G30510,AT4G31390,AT1G49340,AT4G27800,AT3G01510,AT5G23060,AT1G12360,AT4G27030,AT2G15890,AT1G07920,AT1G32500,AT5G37600,AT4G27410,AT2G47900,AT1G64680,AT1G47640,AT2G19600,AT1G74960,AT1G78570,AT2G26080,AT1G07010,AT5G25400,AT3G22370,AT5G59840,AT1G62780,AT3G43540,AT5G48300,AT1G24620,AT4G04955,AT4G32410,AT1G60950,AT4G30310,AT5G64260,AT1G69800,AT5G08650,AT4G01210,AT5G13200,AT3G23660,AT3G61320,AT5G64120,AT2G39800,AT5G62220,AT1G30360,AT1G17840,AT2G30490,AT1G31910,AT5G33320,AT2G25490,AT3G52090,AT4G33030,AT2G47600,AT5G03860,AT4G21990,AT3G47550,AT2G36530,AT1G68560,AT5G13030,AT4G00680,AT1G52510,AT1G01040,AT4G18360,AT4G20360,AT1G77090,AT5G03940,AT2G42600,AT5G64940,AT5G43430,AT5G49740,AT1G32900,AT1G01050,AT1G62330,AT1G05940,AT4G36530,AT5G67480,AT5G13650,AT4G30510,AT2G22780,AT1G48130,AT1G07810,AT5G13630,AT1G74380,AT4G01370,AT2G28800,AT3G10530,AT4G25130,AT1G76690,AT2G47450,AT3G58140,AT5G62740,AT1G54350,AT1G10630,AT2G32810,AT1G64970,AT2G37970,AT3G21720,AT3G24430,AT5G41610,AT3G15730,AT4G26850,AT1G54570,AT1G44920,AT4G37870,AT1G71790,AT1G75850,AT5G57800,AT3G11470,AT2G21070,AT3G58800,AT2G38960,AT4G02500,AT4G04350,AT5G06720,AT5G53450,AT2G23810,AT2G31670,AT4G14680,AT3G07720,AT5G61380,AT5G42270,AT2G24270,AT5G13420 |
| GO:CC | chloroplast envelope | GO:0009941 | 0.00461700 | 2.33563946 | 692   | 204 | 20  | AT4G37270,AT5G51070,AT1G55480,AT5G17170,AT4G27030,AT1G64680,AT2G26080,AT1G30360,AT5G33320,AT1G52510,AT4G20360,AT5G64940,AT5G49740,AT1G05940,AT4G36530,AT5G13630,AT4G25130,AT2G47450,AT3G55800,AT5G42270                                                                                                                                                                                                                                                                                                                                                                                                                                                                                                                                                                                                                                                                                                                                                                                                                                                                                                                                                                                                                                                                                                                                                                                                                                                                                                                                                                                                       |
| GO:CC | membrane             | GO:0016020 | 0.00881320 | 2.05486600 | 8169  | 204 | 111 | AT2G37050,AT1G69220,AT4G37270,AT5G04870,AT5G20350,AT1G65930,AT4G29130,AT1G13440,AT5G04040,AT3G04090,AT4G16600,AT5G39040,AT1G55480,AT5G02500,AT5G13930,AT3G27020,AT2G34770,AT5G17170,AT1G27350,AT3G59340,AT1G17500,AT4G36750,AT3G52950,AT4G31390,AT1G49340,AT4G27800,AT5G23060,AT1G12360,AT4G27030,AT1G07920,AT5G37600,AT3G01930,AT2G47900,AT1G47640,AT2G19600,AT3G58690,AT5G55960,AT5G25400,AT3G22370,AT2G38110,AT5G59840,AT1G64060,AT1G34340,AT3G22850,AT4G32410,AT4G30310,AT1G69800,AT5G08650,AT4G01210,AT3G23660,AT1G02520,AT3G61320,AT5G62220,AT1G30360,AT1G17840,AT2G30490,AT5G33320,AT4G33030,AT3G53950,AT2G47600,AT3G47550,AT2G36530,AT4G27435,AT4G20360,AT1G77090,AT5G03940,AT5G64940,AT5G48930,AT4G11350,AT5G49740,AT5G56320,AT1G28440,AT1G62330,AT1G05940,AT4G17790,AT4G30510,AT4G24040,AT1G07810,AT5G13630,AT1G74380,AT3G54100,AT5G35735,AT2G28800,AT5G22340,AT3G05940,AT3G03341,AT2G47450,AT3G17020,AT3G03800,AT5G62740,AT1G54350,AT5G43350,AT1G10630,AT2G32810,AT2G37970,AT5G41610,AT3G15730,AT5G22300,AT5G63500,AT1G44920,AT5G63930,AT1G75850,AT5G57800,AT3G52940,AT2G38960,AT4G02500,AT5G06720,AT1G12110,AT2G23810,AT3G29030,AT5G42270                                                                                                                                                                                                                                                                                                                                                                                                                                                         |

|       |                               |            |            |            |       |     |     |                                                                                                                                                                                                                                                                                                                                                                                                                                                                                                                                                                                                                                                                                                                                                                                                                                                                                                                                                                                                                                                                                                                                                                                                                                                                                                                                                                                                                                                                                                                                                                                                                                                                                                                                                                                                                                                                                                                                                                                                                                                                                           |
|-------|-------------------------------|------------|------------|------------|-------|-----|-----|-------------------------------------------------------------------------------------------------------------------------------------------------------------------------------------------------------------------------------------------------------------------------------------------------------------------------------------------------------------------------------------------------------------------------------------------------------------------------------------------------------------------------------------------------------------------------------------------------------------------------------------------------------------------------------------------------------------------------------------------------------------------------------------------------------------------------------------------------------------------------------------------------------------------------------------------------------------------------------------------------------------------------------------------------------------------------------------------------------------------------------------------------------------------------------------------------------------------------------------------------------------------------------------------------------------------------------------------------------------------------------------------------------------------------------------------------------------------------------------------------------------------------------------------------------------------------------------------------------------------------------------------------------------------------------------------------------------------------------------------------------------------------------------------------------------------------------------------------------------------------------------------------------------------------------------------------------------------------------------------------------------------------------------------------------------------------------------------|
| GO:CC | plastid envelope              | GO:0009526 | 0.01175215 | 1.92988260 | 988   | 204 | 24  | AT4G37270,AT5G51070,AT1G55480,AT3G27020,AT5G17170,AT5G23060,AT4G27030,AT1G64680,AT2G26080,AT3G61320,AT1G30360,AT5G33320,AT1G52510,AT4G20360,AT5G64940,AT5G49740,AT1G05940,AT4G36530,AT5G13630,AT2G28800,AT4G25130,AT2G47450,AT3G55800,AT5G42270                                                                                                                                                                                                                                                                                                                                                                                                                                                                                                                                                                                                                                                                                                                                                                                                                                                                                                                                                                                                                                                                                                                                                                                                                                                                                                                                                                                                                                                                                                                                                                                                                                                                                                                                                                                                                                           |
| GO:CC | cellular anatomical structure | GO:0110165 | 0.01301609 | 1.88551926 | 18497 | 204 | 201 | AT5G05340,AT5G54510,AT2G37050,AT1G69220,AT1G61700,AT5G63190,AT4G37270,AT5G04870,AT5G20350,AT1G65930,AT4G29130,AT1G13440,AT5G04040,AT3G04090,AT1G36370,AT3G58670,AT1G72030,AT1G50450,AT4G16600,AT5G51070,AT5G39040,AT1G55480,AT5G02500,AT5G13930,AT2G06990,AT1G56310,AT4G12570,AT3G27020,AT2G22910,AT2G34770,AT5G17170,AT2G20630,AT2G35840,AT1G27350,AT3G59340,AT2G37040,AT4G35770,AT2G38240,AT2G22240,AT1G27680,AT1G17500,AT5G30510,AT4G36750,AT3G52950,AT4G31390,AT1G49340,AT4G27800,AT3G01510,AT5G23060,AT1G12360,AT4G27030,AT2G15890,AT1G07920,AT1G32500,AT5G37600,AT4G27410,AT3G01930,AT2G47900,AT1G64680,AT1G47640,AT2G19600,AT1G74960,AT1G78570,AT2G26080,AT3G58690,AT1G07010,AT5G55960,AT5G25400,AT3G22370,AT2G38110,AT5G59840,AT1G62780,AT3G43540,AT5G48300,AT1G24620,AT4G04955,AT1G64060,AT1G34340,AT3G22850,AT4G32410,AT1G60950,AT4G30310,AT5G64260,AT1G69800,AT2G41480,AT4G38030,AT2G17700,AT5G08650,AT4G01210,AT5G13200,AT3G23660,AT1G02520,AT3G61320,AT5G64120,AT2G39800,AT5G62220,AT1G30360,AT1G17840,AT2G30490,AT1G31910,AT5G33320,AT2G25490,AT3G52090,AT4G33030,AT3G53950,AT2G47600,AT5G03860,AT4G21990,AT3G47550,AT2G36530,AT1G68560,AT5G13030,AT4G27435,AT4G00680,AT1G52510,AT1G01040,AT4G18360,AT4G20360,AT1G77090,AT5G03940,AT2G42600,AT5G64940,AT5G48930,AT5G43430,AT4G11350,AT5G49740,AT5G56320,AT1G32900,AT1G01050,AT1G28440,AT1G62330,AT1G05940,AT4G36530,AT5G67480,AT5G13650,AT4G17790,AT4G30510,AT4G24040,AT2G22780,AT1G48130,AT1G07810,AT5G13630,AT1G74380,AT3G54100,AT4G01370,AT5G35735,AT2G28800,AT5G22340,AT3G05940,AT4G26270,AT5G19730,AT3G10530,AT4G25130,AT3G03341,AT1G76690,AT2G47450,AT3G58140,AT3G17020,AT3G03800,AT5G62740,AT3G06610,AT1G54350,AT5G43350,AT1G10630,AT2G32810,AT1G64970,AT2G37970,AT3G21720,AT3G24430,AT5G41610,AT3G15730,AT5G22300,AT4G26850,AT1G54570,AT5G63500,AT1G44920,AT5G63930,AT4G37870,AT1G71790,AT1G75850,AT5G57800,AT3G11470,AT2G21070,AT3G52940,AT3G55800,AT2G38960,AT4G02500,AT4G04350,AT1G57590,AT5G06720,AT1G12110,AT5G53450,AT2G23810,AT2G31670,AT4G14680,AT3G07720,AT3G29030,AT5G61380,AT5G42270,AT2G24270,AT5G13420 |
| GO:CC | vacuole                       | GO:0005773 | 0.02164995 | 1.66454309 | 1094  | 204 | 25  | AT5G05340,AT4G29130,AT5G39040,AT5G02500,AT5G13930,AT3G27020,AT1G12360,AT1G07920,AT2G26080,AT5G64120,AT1G30360,AT2G30490,AT2G47600,AT1G05940,AT5G67480,AT4G30510,AT1G07810,AT5G62740,AT1G10630,AT2G32810,AT2G37970,AT3G15730,AT5G06720,AT2G23810,AT2G24270                                                                                                                                                                                                                                                                                                                                                                                                                                                                                                                                                                                                                                                                                                                                                                                                                                                                                                                                                                                                                                                                                                                                                                                                                                                                                                                                                                                                                                                                                                                                                                                                                                                                                                                                                                                                                                 |
| GO:CC | peroxisome                    | GO:0005777 | 0.04245246 | 1.37209705 | 350   | 204 | 12  | AT5G04870,AT1G13440,AT5G04040,AT1G07010,AT2G30490,AT1G31910,AT5G03860,AT4G18360,AT2G22780,AT2G28800,AT3G21720,AT2G31670                                                                                                                                                                                                                                                                                                                                                                                                                                                                                                                                                                                                                                                                                                                                                                                                                                                                                                                                                                                                                                                                                                                                                                                                                                                                                                                                                                                                                                                                                                                                                                                                                                                                                                                                                                                                                                                                                                                                                                   |
| GO:CC | microbody                     | GO:0042579 | 0.04245246 | 1.37209705 | 350   | 204 | 12  | AT5G04870,AT1G13440,AT5G04040,AT1G07010,AT2G30490,AT1G31910,AT5G03860,AT4G18360,AT2G22780,AT2G28800,AT3G21720,AT2G31670                                                                                                                                                                                                                                                                                                                                                                                                                                                                                                                                                                                                                                                                                                                                                                                                                                                                                                                                                                                                                                                                                                                                                                                                                                                                                                                                                                                                                                                                                                                                                                                                                                                                                                                                                                                                                                                                                                                                                                   |

|      |                                         |            |            |            |      |    |                                                                                                                                                                                                                                                                                                                                                                                                                                                                                                                                                                                                        |
|------|-----------------------------------------|------------|------------|------------|------|----|--------------------------------------------------------------------------------------------------------------------------------------------------------------------------------------------------------------------------------------------------------------------------------------------------------------------------------------------------------------------------------------------------------------------------------------------------------------------------------------------------------------------------------------------------------------------------------------------------------|
| KEGG | Biosynthesis of secondary metabolites   | KEGG:01110 | 0.00001870 | 4.72806090 | 1283 | 89 | 43 AT5G05340,AT1G65930,AT4G29130,AT1G13440,AT5G04040,AT1G36370,AT5G13930,AT2G22910,AT2G35840,AT2G37040,AT2G22240,AT1G27680,AT4G36750,AT2G26080,AT2G38110,AT5G48300,AT2G41480,AT5G64120,AT2G39800,AT2G30490,AT1G31910,AT5G03860,AT2G36530,AT4G18360,AT5G48930,AT1G32900,AT4G24040,AT2G22780,AT1G48130,AT5G13630,AT4G26270,AT4G02280,AT1G76690,AT1G64970,AT3G21720,AT3G15730,AT5G22300,AT4G26850,AT4G37870,AT3G52940,AT5G06720,AT4G14680,AT5G13420                                                                                                                                                       |
| KEGG | Carbon metabolism                       | KEGG:01200 | 0.00028914 | 3.53888854 | 271  | 89 | 16 AT1G65930,AT4G29130,AT1G13440,AT1G36370,AT2G26080,AT5G03860,AT2G36530,AT4G18360,AT2G42600,AT2G22780,AT4G26270,AT3G21720,AT4G37870,AT3G55800,AT2G24270,AT5G13420                                                                                                                                                                                                                                                                                                                                                                                                                                     |
| KEGG | Metabolic pathways                      | KEGG:01100 | 0.00149602 | 2.82506249 | 2337 | 89 | 58 AT5G05340,AT1G65930,AT4G29130,AT1G13440,AT5G04040,AT1G36370,AT5G13930,AT2G22910,AT2G37040,AT2G22240,AT1G27680,AT4G36750,AT1G49340,AT5G37600,AT1G74960,AT1G78570,AT2G26080,AT2G38110,AT5G48300,AT4G04955,AT1G60950,AT4G30310,AT2G41480,AT3G02470,AT5G64120,AT2G39800,AT2G30490,AT1G31910,AT4G33030,AT5G03860,AT4G21990,AT2G36530,AT4G18360,AT2G42600,AT3G29090,AT5G48930,AT1G32900,AT4G24040,AT2G22780,AT1G48130,AT5G13630,AT4G26270,AT5G19730,AT4G02280,AT1G76690,AT1G64970,AT3G21720,AT3G15730,AT5G22300,AT4G26850,AT4G37870,AT3G11470,AT3G52940,AT3G55800,AT5G06720,AT4G14680,AT2G24270,AT5G13420 |
| KEGG | Glyoxylate and dicarboxylate metabolism | KEGG:00630 | 0.00942303 | 2.02580912 | 77   | 89 | 7 AT1G36370,AT5G37600,AT2G26080,AT5G03860,AT4G18360,AT2G22780,AT3G21720                                                                                                                                                                                                                                                                                                                                                                                                                                                                                                                                |
| KEGG | Phenylpropanoid biosynthesis            | KEGG:00940 | 0.04360348 | 1.36047884 | 128  | 89 | 8 AT5G05340,AT2G37040,AT2G41480,AT5G64120,AT2G30490,AT5G48930,AT1G48130,AT5G06720                                                                                                                                                                                                                                                                                                                                                                                                                                                                                                                      |
| WP   | Glycolysis                              | WP:WP2621  | 0.03151642 | 1.50146311 | 37   | 14 | 4 AT1G13440,AT2G36530,AT2G42600,AT4G26270                                                                                                                                                                                                                                                                                                                                                                                                                                                                                                                                                              |

**Supplementary Table 7 Gene ontology and KEGG pathways annotation of Riccia fluitans transcripts with changes in polyA tails length engaged in response to high- and low-dose of micro-/nanoplastic (MNP) pollution**

| source | term_name                                                           | term_id    | adjusted_p_value         | negative_log10_of_adjusted_p_value | term_size | query_size | intersection_size | intersections                                                                                                                                                 |
|--------|---------------------------------------------------------------------|------------|--------------------------|------------------------------------|-----------|------------|-------------------|---------------------------------------------------------------------------------------------------------------------------------------------------------------|
| GO:MF  | chlorophyll binding                                                 | GO:0016168 | 0.00007774569862959006   | 4.109323629479376                  | 34        | 40         | 4                 | AT2G05070,AT1G61520,AT2G05100,AT3G27690                                                                                                                       |
| GO:MF  | protein domain specific binding                                     | GO:0019904 | 0.005365757477417515     | 2.2703689605495723                 | 97        | 40         | 4                 | AT3G16640,AT1G61520,AT2G05100,AT1G32060                                                                                                                       |
| GO:MF  | (S)-2-hydroxy-acid oxidase activity                                 | GO:0003973 | 0.006458120637776109     | 2.189893846616608                  | 5         | 40         | 2                 | AT4G18360,AT3G14415                                                                                                                                           |
| GO:MF  | oxygen binding                                                      | GO:0019825 | 0.006458120637776109     | 2.189893846616608                  | 5         | 40         | 2                 | AT2G16060,AT5G42650<br>AT2G16060,AT2G05070,AT1G61520,AT5G42650,AT2G05100,                                                                                     |
| GO:MF  | tetrapyrrole binding                                                | GO:0046906 | 0.017699059597197773     | 1.7520498083612237                 | 418       | 40         | 6                 | AT3G27690                                                                                                                                                     |
| GO:MF  | ribulose-bisphosphate carboxylase activity                          | GO:0016984 | 0.023146467521196843     | 1.6355152790784748                 | 9         | 40         | 2                 | AT2G39730,AT1G67090                                                                                                                                           |
| GO:BP  | photosynthesis, light harvesting in photosystem I                   | GO:0009768 | 2.3895026516081223e-9    | 8.621692483210508                  | 10        | 41         | 5                 | AT2G05070,AT1G61520,AT2G05100,AT3G27690,AT1G08380                                                                                                             |
| GO:BP  | photosynthesis                                                      | GO:0015979 | 4.327751807370932e-8     | 7.363737653580781                  | 281       | 41         | 10                | AT2G05070,AT1G60950,AT1G61520,AT1G67090,AT4G04640,<br>AT2G05100,AT3G27690,AT1G08380,AT1G79040,AT1G32060<br>AT2G05070,AT1G60950,AT1G61520,AT4G04640,AT2G05100, |
| GO:BP  | photosynthesis, light reaction reactive oxygen species              | GO:0019684 | 1.3596216207657801e-7    | 6.866581937863166                  | 146       | 41         | 8                 | AT3G27690,AT1G08380,AT1G79040                                                                                                                                 |
| GO:BP  | biosynthetic process                                                | GO:1903409 | 9.092136787958902e-7     | 6.041334039092154                  | 28        | 41         | 5                 | AT4G18360,AT2G05070,AT2G05100,AT3G27690,AT3G14415                                                                                                             |
| GO:BP  | photosynthesis, light harvesting                                    | GO:0009765 | 0.000003983195639511669  | 5.399768362163671                  | 37        | 41         | 5                 | AT2G05070,AT1G61520,AT2G05100,AT3G27690,AT1G08380                                                                                                             |
| GO:BP  | regulation of stomatal closure photosynthesis, light harvesting in  | GO:0090333 | 0.0000059881764000357436 | 5.2227054146693765                 | 40        | 41         | 5                 | AT2G05070,AT3G16640,AT5G23060,AT2G05100,AT3G27690                                                                                                             |
| GO:BP  | photosystem II response to low light intensity                      | GO:0009769 | 0.00001303560358409945   | 4.884868855007741                  | 4         | 41         | 3                 | AT2G05070,AT2G05100,AT3G27690                                                                                                                                 |
| GO:BP  | stimulus                                                            | GO:0009645 | 0.00002148434295293174   | 4.667877923631437                  | 19        | 41         | 4                 | AT2G05070,AT1G61520,AT2G05100,AT3G27690                                                                                                                       |
| GO:BP  | stomatal closure generation of precursor metabolites and energy     | GO:0090332 | 0.00003722769439459789   | 4.429133859905965                  | 57        | 41         | 5                 | AT2G05070,AT3G16640,AT5G23060,AT2G05100,AT3G27690<br>AT2G05070,AT1G60950,AT1G61520,AT1G76100,AT4G04640,                                                       |
| GO:BP  | positive regulation of reactive oxygen species biosynthetic process | GO:0006091 | 0.00007845768302330205   | 4.105364521404705                  | 462       | 41         | 9                 | AT2G05100,AT3G27690,AT1G08380,AT1G79040                                                                                                                       |
| GO:BP  | positive regulation of reactive oxygen species metabolic process    | GO:1903428 | 0.00011361729229759553   | 3.9445555649463255                 | 7         | 41         | 3                 | AT2G05070,AT2G05100,AT3G27690                                                                                                                                 |
| GO:BP  | regulation of stomatal movement                                     | GO:0010119 | 0.0009242179132063851    | 3.03422561823314                   | 108       | 41         | 5                 | AT2G05070,AT3G16640,AT5G23060,AT2G05100,AT3G27690                                                                                                             |
| GO:BP  | response to desiccation                                             | GO:0009269 | 0.0021789032647326462    | 2.6617620503987114                 | 17        | 41         | 3                 | AT2G05070,AT2G05100,AT3G27690                                                                                                                                 |
| GO:BP  | regulation of reactive oxygen species biosynthetic process          | GO:1903426 | 0.0021789032647326462    | 2.6617620503987114                 | 17        | 41         | 3                 | AT2G05070,AT2G05100,AT3G27690                                                                                                                                 |
| GO:BP  | response to high light intensity                                    | GO:0009644 | 0.0033142126840254916    | 2.479619624904361                  | 64        | 41         | 4                 | AT2G05070,AT1G61520,AT2G05100,AT3G27690                                                                                                                       |
| GO:BP  | response to light intensity                                         | GO:0009642 | 0.005262664723092436     | 2.278794297387061                  | 154       | 41         | 5                 | AT2G05070,AT1G60950,AT1G61520,AT2G05100,AT3G27690                                                                                                             |

|       |                                           |            |                        |                    |      |    |                                                                                                                                                                                                               |
|-------|-------------------------------------------|------------|------------------------|--------------------|------|----|---------------------------------------------------------------------------------------------------------------------------------------------------------------------------------------------------------------|
| GO:BP | response to cold                          | GO:0009409 | 0.0053051494394387305  | 2.2753023780567925 | 410  | 41 | AT2G05070,AT2G39730,AT1G61520,AT1G67090,AT2G05100,<br>7 AT3G27690,AT1G32060                                                                                                                                   |
| GO:BP | response to stress                        | GO:0006950 | 0.00668896213426236    | 2.1746412625505    | 3733 | 41 | AT4G18360,AT2G16060,AT2G05070,AT3G16640,AT4G14680,<br>AT5G18610,AT2G39730,AT1G61520,AT5G40370,AT1G67090,<br>AT2G30870,AT5G42650,AT2G05100,AT3G27690,AT1G80030,<br>19 AT3G14415,AT5G13930,AT1G27350,AT1G32060  |
| GO:BP | stomatal movement                         | GO:0010118 | 0.006727279365664212   | 2.1721605368709103 | 162  | 41 | 5 AT2G05070,AT3G16640,AT5G23060,AT2G05100,AT3G27690<br>AT2G16060,AT2G05070,AT1G60950,AT3G16640,AT2G39730,<br>AT1G61520,AT1G67090,AT5G23060,AT2G30870,AT2G05100,<br>14 AT3G27690,AT1G80030,AT5G13930,AT1G32060 |
| GO:BP | response to abiotic stimulus              | GO:0009628 | 0.009689507312456214   | 2.0136983051908692 | 2131 | 41 | AT2G05070,AT2G39730,AT1G61520,AT1G67090,AT2G05100,<br>8 AT3G27690,AT1G80030,AT1G32060                                                                                                                         |
| GO:BP | response to temperature stimulus          | GO:0009266 | 0.01156662077791716    | 1.9367935029204508 | 644  | 41 | 8 AT3G27690,AT1G80030,AT1G32060                                                                                                                                                                               |
| GO:BP | reactive oxygen species metabolic process | GO:0072593 | 0.0134354873864911     | 1.87174657445416   | 187  | 41 | 5 AT4G18360,AT2G05070,AT2G05100,AT3G27690,AT3G14415                                                                                                                                                           |
| GO:BP | cellular response to water deprivation    | GO:0042631 | 0.02845860947171233    | 1.545786323981731  | 39   | 41 | 3 AT2G05070,AT2G05100,AT3G27690                                                                                                                                                                               |
| GO:BP | cellular response to water stimulus       | GO:0071462 | 0.030726139845115227   | 1.5124919971555315 | 40   | 41 | 3 AT2G05070,AT2G05100,AT3G27690                                                                                                                                                                               |
| GO:BP | response to light stimulus                | GO:0009416 | 0.0388109156075053     | 1.411046111483211  | 764  | 41 | AT2G05070,AT1G60950,AT2G39730,AT1G61520,AT5G23060,<br>8 AT2G05100,AT3G27690,AT5G13930                                                                                                                         |
| GO:BP | response to far red light                 | GO:0010218 | 0.04097460362278145    | 1.3874852389843433 | 44   | 41 | 3 AT2G05070,AT2G05100,AT3G27690                                                                                                                                                                               |
| GO:BP | response to radiation                     | GO:0009314 | 0.04525909391683874    | 1.3442941448323737 | 781  | 41 | AT2G05070,AT1G60950,AT2G39730,AT1G61520,AT5G23060,<br>8 AT2G05100,AT3G27690,AT5G13930                                                                                                                         |
| GO:BP |                                           |            |                        |                    |      |    | AT4G01150,AT2G05070,AT3G16640,AT2G05990,AT2G39730,<br>AT1G61520,AT1G76100,AT1G67090,AT4G04640,AT5G23060,<br>AT5G42650,AT2G05100,AT3G27690,AT1G08380,AT2G26900,<br>18 AT1G79040,AT1G80030,AT1G32060            |
| GO:CC | thylakoid                                 | GO:0009579 | 1.5350583512028492e-15 | 14.813875111311383 | 596  | 40 | AT4G01150,AT2G05070,AT2G39730,AT1G61520,AT1G76100,<br>AT1G67090,AT4G04640,AT5G23060,AT5G42650,AT2G05100,<br>AT3G27690,AT1G08380,AT2G26900,AT1G79040,AT1G80030,<br>16 AT1G32060                                |
| GO:CC | chloroplast thylakoid                     | GO:0009534 | 1.0502390698993042e-13 | 12.978711829577755 | 517  | 40 | AT4G01150,AT2G05070,AT2G39730,AT1G61520,AT1G76100,<br>AT1G67090,AT4G04640,AT5G23060,AT5G42650,AT2G05100,<br>AT3G27690,AT1G08380,AT2G26900,AT1G79040,AT1G80030,<br>16 AT1G32060                                |
| GO:CC | plastid thylakoid                         | GO:0031976 | 1.1156064346507708e-13 | 12.95248898945326  | 519  | 40 | AT4G01150,AT2G05070,AT2G39730,AT1G61520,AT1G76100,<br>AT1G67090,AT4G04640,AT5G23060,AT5G42650,AT2G05100,<br>15 AT3G27690,AT1G08380,AT1G79040,AT1G80030,AT1G32060                                              |
| GO:CC | chloroplast thylakoid membrane            | GO:0009535 | 1.4286594943998935e-13 | 12.845071268287091 | 424  | 40 | AT4G01150,AT2G05070,AT2G39730,AT1G61520,AT1G76100,<br>AT1G67090,AT4G04640,AT5G23060,AT5G42650,AT2G05100,<br>15 AT3G27690,AT1G08380,AT1G79040,AT1G80030,AT1G32060                                              |
| GO:CC | plastid thylakoid membrane                | GO:0055035 | 1.5313198166136742e-13 | 12.81493409729296  | 426  | 40 | AT4G01150,AT2G05070,AT2G39730,AT1G61520,AT1G76100,<br>AT1G67090,AT4G04640,AT5G23060,AT5G42650,AT2G05100,<br>15 AT3G27690,AT1G08380,AT1G79040,AT1G80030,AT1G32060                                              |

|       |                                |            |                        |                    |      |    |                                                                                                                                                                                                                                                                                                                                                                                                                                    |
|-------|--------------------------------|------------|------------------------|--------------------|------|----|------------------------------------------------------------------------------------------------------------------------------------------------------------------------------------------------------------------------------------------------------------------------------------------------------------------------------------------------------------------------------------------------------------------------------------|
| GO:CC | thylakoid membrane             | GO:0042651 | 2.635911336768274e-13  | 12.5790692020446   | 442  | 40 | AT4G01150,AT2G05070,AT2G39730,AT1G61520,AT1G76100,AT1G67090,AT4G04640,AT5G23060,AT5G42650,AT2G05100,15 AT3G27690,AT1G08380,AT1G79040,AT1G80030,AT1G32060                                                                                                                                                                                                                                                                           |
| GO:CC | photosynthetic membrane        | GO:0034357 | 2.725037778748491e-13  | 12.56462747247421  | 443  | 40 | AT4G01150,AT2G05070,AT2G39730,AT1G61520,AT1G76100,AT1G67090,AT4G04640,AT5G23060,AT5G42650,AT2G05100,15 AT3G27690,AT1G08380,AT1G79040,AT1G80030,AT1G32060                                                                                                                                                                                                                                                                           |
| GO:CC | outer membrane                 | GO:0019867 | 5.801239334732453e-12  | 11.236479216999305 | 546  | 40 | AT4G01150,AT2G05070,AT2G39730,AT1G61520,AT1G76100,AT1G67090,AT4G04640,AT5G23060,AT5G42650,AT2G05100,15 AT3G27690,AT1G08380,AT1G79040,AT1G80030,AT1G32060                                                                                                                                                                                                                                                                           |
| GO:CC | organelle outer membrane       | GO:0031968 | 5.801239334732453e-12  | 11.236479216999305 | 546  | 40 | AT4G01150,AT2G05070,AT2G39730,AT1G61520,AT1G76100,AT1G67090,AT4G04640,AT5G23060,AT5G42650,AT2G05100,15 AT3G27690,AT1G08380,AT1G79040,AT1G80030,AT1G32060<br>AT5G36790,AT4G01150,AT2G05070,AT1G60950,AT3G16640,AT3G02630,AT4G14680,AT2G05990,AT2G39730,AT5G13560,AT1G61520,AT1G76100,AT5G40370,AT1G67090,AT4G04640,AT5G23060,AT2G30870,AT5G42650,AT2G05100,AT3G27690,AT1G08380,AT2G26900,AT1G79040,AT1G80030,AT3G14415,26 AT1G32060 |
| GO:CC | plastid                        | GO:0009536 | 2.6399419905742176e-11 | 10.57840561610377  | 2856 | 40 | AT5G36790,AT4G01150,AT2G05070,AT1G60950,AT3G16640,AT3G02630,AT4G14680,AT2G05990,AT2G39730,AT1G61520,AT1G76100,AT1G67090,AT4G04640,AT5G23060,AT2G30870,AT5G42650,AT2G05100,AT3G27690,AT1G08380,AT2G26900,24 AT1G79040,AT1G80030,AT3G14415,AT1G32060                                                                                                                                                                                 |
| GO:CC | chloroplast                    | GO:0009507 | 3.827901345939793e-11  | 10.417039263545682 | 2351 | 40 | AT4G01150,AT2G05070,AT2G39730,AT1G61520,AT1G76100,AT1G67090,AT4G04640,AT5G23060,AT5G42650,AT2G05100,15 AT3G27690,AT1G08380,AT1G79040,AT1G80030,AT1G32060<br>AT4G01150,AT2G05070,AT2G05990,AT2G39730,AT1G61520,AT1G76100,AT1G67090,AT4G04640,AT5G23060,AT5G42650,AT2G05100,AT3G27690,AT1G08380,AT2G26900,AT1G79040,17 AT1G80030,AT1G32060                                                                                           |
| GO:CC | plastid membrane               | GO:0042170 | 1.215733487098936e-10  | 9.915161620596319  | 674  | 40 | AT4G01150,AT2G05070,AT2G39730,AT1G61520,AT1G76100,AT1G67090,AT4G04640,AT5G23060,AT5G42650,AT2G05100,15 AT3G27690,AT1G08380,AT1G79040,AT1G80030,AT1G32060<br>AT4G01150,AT2G05070,AT2G05990,AT2G39730,AT1G61520,AT1G76100,AT1G67090,AT4G04640,AT5G23060,AT5G42650,AT2G05100,AT3G27690,AT1G08380,AT2G26900,AT1G79040,17 AT1G80030,AT1G32060                                                                                           |
| GO:CC | plastid envelope               | GO:0009526 | 1.5377264841008397e-10 | 9.813120905763055  | 988  | 40 | AT4G01150,AT2G05070,AT2G39730,AT1G61520,AT1G76100,AT1G67090,AT4G04640,AT5G23060,AT5G42650,AT2G05100,15 AT3G27690,AT1G08380,AT5G57190,AT1G79040,AT1G80030,17 AT5G13930,AT1G32060                                                                                                                                                                                                                                                    |
| GO:CC | bounding membrane of organelle | GO:0098588 | 3.998152004766825e-8   | 7.398140698567943  | 1406 | 40 | AT4G01150,AT2G05070,AT2G05990,AT2G39730,AT1G61520,AT1G76100,AT1G67090,AT4G04640,AT5G23060,AT5G42650,AT2G05100,AT3G27690,AT1G08380,AT2G26900,AT1G79040,17 AT1G80030,AT1G32060                                                                                                                                                                                                                                                       |
| GO:CC | organelle envelope             | GO:0031967 | 6.573049829455088e-8   | 7.1822330753759    | 1452 | 40 | AT4G01150,AT2G05070,AT2G39730,AT1G61520,AT1G76100,AT1G67090,AT4G04640,AT5G23060,AT5G42650,AT2G05100,AT3G27690,AT1G08380,AT2G26900,AT1G79040,17 AT1G80030,AT1G32060                                                                                                                                                                                                                                                                 |

|       |                                                |            |                          |                    |      |    |                                                                                                                                                                                                                                                                                                                                                        |
|-------|------------------------------------------------|------------|--------------------------|--------------------|------|----|--------------------------------------------------------------------------------------------------------------------------------------------------------------------------------------------------------------------------------------------------------------------------------------------------------------------------------------------------------|
| GO:CC | intracellular membraneless organelle           | GO:0043232 | 1.8566385974735303e-7    | 6.731272625284446  | 2568 | 40 | 21 AT4G01150,AT2G05070,AT3G16640,AT2G05990,AT2G39730,AT5G59240,AT1G61520,AT1G76100,AT1G67090,AT4G04640,AT5G23060,AT3G14360,AT5G42650,AT2G05100,AT3G27690,AT1G08380,AT2G26900,AT1G79040,AT1G80030,AT3G06680,AT1G32060                                                                                                                                   |
| GO:CC | membraneless organelle                         | GO:0043228 | 1.8566385974735303e-7    | 6.731272625284446  | 2568 | 40 | 21 AT4G01150,AT2G05070,AT2G05990,AT2G39730,AT1G67090,AT4G04640,AT5G23060,AT3G14360,AT5G42650,AT2G05100,AT3G27690,AT1G08380,AT2G26900,AT1G79040,AT1G80030,AT3G06680,AT1G32060                                                                                                                                                                           |
| GO:CC | chloroplast envelope                           | GO:0009941 | 5.794245459079478e-7     | 6.237003110915867  | 692  | 40 | 12 AT4G01150,AT2G05070,AT2G05990,AT2G39730,AT1G67090,AT4G04640,AT5G42650,AT2G05100,AT3G27690,AT2G26900,AT1G80030,AT1G32060                                                                                                                                                                                                                             |
| GO:CC | photosystem I                                  | GO:0009522 | 0.0000021380662571433538 | 5.66997884044348   | 43   | 40 | 5 AT2G05070,AT1G61520,AT2G05100,AT3G27690,AT1G08380                                                                                                                                                                                                                                                                                                    |
| GO:CC | photosystem                                    | GO:0009521 | 0.0000035512847645882296 | 5.449614501809681  | 97   | 40 | 6 AT2G05070,AT1G61520,AT2G05100,AT3G27690,AT1G08380,AT1G79040                                                                                                                                                                                                                                                                                          |
| GO:CC | plastoglobule                                  | GO:0010287 | 0.00001398039453019537   | 4.854480572519585  | 62   | 40 | 5 AT4G01150,AT2G05070,AT2G39730,AT1G61520,AT5G42650                                                                                                                                                                                                                                                                                                    |
| GO:CC | PSII associated light-harvesting complex II    | GO:0009517 | 0.000014077268177331491  | 4.851481615834561  | 6    | 40 | 3 AT2G05070,AT2G05100,AT3G27690                                                                                                                                                                                                                                                                                                                        |
| GO:CC | chloroplast stroma                             | GO:0009570 | 0.000018146902987831293  | 4.741197482476969  | 762  | 40 | 11 AT4G01150,AT2G05070,AT3G02630,AT4G14680,AT2G05990,AT2G39730,AT1G61520,AT1G67090,AT5G42650,AT3G14415,AT1G32060                                                                                                                                                                                                                                       |
| GO:CC | plastid stroma                                 | GO:0009532 | 0.00001988948751487407   | 4.70137640703794   | 769  | 40 | 11 AT4G01150,AT2G05070,AT3G02630,AT4G14680,AT2G05990,AT2G39730,AT1G61520,AT1G67090,AT5G42650,AT3G14415,AT1G32060                                                                                                                                                                                                                                       |
| GO:CC | light-harvesting complex                       | GO:0030076 | 0.000039307208313778135  | 4.405527799654205  | 8    | 40 | 3 AT2G05070,AT2G05100,AT3G27690                                                                                                                                                                                                                                                                                                                        |
| GO:CC | thylakoid light-harvesting complex             | GO:0009503 | 0.000039307208313778135  | 4.405527799654205  | 8    | 40 | 3 AT2G05070,AT2G05100,AT3G27690                                                                                                                                                                                                                                                                                                                        |
| GO:CC | photosystem II                                 | GO:0009523 | 0.00004455838322475654   | 4.3510705756733135 | 78   | 40 | 5 AT2G05070,AT1G61520,AT2G05100,AT3G27690,AT1G79040                                                                                                                                                                                                                                                                                                    |
| GO:CC | cytoplasm                                      | GO:0005737 | 0.0000930183968927115    | 4.03143114952294   | 9524 | 40 | 34 AT5G36790,AT4G01150,AT4G18360,AT2G16060,AT2G05070,AT1G60950,AT3G16640,AT3G02630,AT1G14400,AT4G14680,AT2G05990,AT2G39730,AT5G59240,AT5G13560,AT1G61520,AT1G76100,AT5G40370,AT1G67090,AT4G04640,AT5G23060,AT2G30870,AT5G42650,AT2G05100,AT3G27690,AT1G08380,AT2G26900,AT5G57190,AT1G79040,AT1G80030,AT3G14415,AT3G06680,AT5G13930,AT1G27350,AT1G32060 |
| GO:CC | organelle membrane                             | GO:0031090 | 0.00012297757939318566   | 3.910174059563678  | 2413 | 40 | 17 AT4G01150,AT2G05070,AT2G39730,AT1G61520,AT1G76100,AT1G67090,AT4G04640,AT5G23060,AT5G42650,AT2G05100,AT3G27690,AT1G08380,AT5G57190,AT1G79040,AT1G80030,AT5G13930,AT1G32060                                                                                                                                                                           |
| GO:CC | chloroplast thylakoid membrane protein complex | GO:0098807 | 0.00047138493030479515   | 3.3266243055411895 | 17   | 40 | 3 AT2G05070,AT2G05100,AT3G27690                                                                                                                                                                                                                                                                                                                        |
